# Supplementary material
Source: Royal Society of Chemistry journal article supplement (doi:10.1039/d6py00314a)
Supplement: d6py00314a1.pdf [file d6py00314a1.pdf]

Supplementary Information for

**Stereospecific polymerization of donor-acceptor cyclopropanes with C(sp<sup>3</sup>)-H bond as the dormant species**

Yong-Le Tian,<sup>a</sup> Yang-Yang Li,<sup>b</sup> Lun-Heng Wei,<sup>b</sup> Shu-Sen Chen,<sup>\*c</sup> Ren-Rong Liu<sup>a</sup> and Dian-Feng Chen<sup>\*b</sup>

<sup>a</sup>College of Chemistry and Chemical Engineering, Qingdao University, Qingdao 266071, China.

<sup>b</sup>Hefei National Research Center of Physical Sciences at the Microscale and Department of Polymer Science and Engineering, University of Science and Technology of China, Hefei, Anhui 230026, China. E-mail: cdf@ustc.edu.cn.

<sup>c</sup>School of Chemistry and Chemical Engineering, Chongqing University, Chongqing 401331, China. E-mail: shusen.chen@cqu.edu.cn.

**Table of Contents**

|                                                          |     |
|----------------------------------------------------------|-----|
| 1. Materials and Methods.....                            | S2  |
| 1.1 Materials .....                                      | S2  |
| 1.2 Methods.....                                         | S2  |
| 2. Synthesis of Monomers.....                            | S3  |
| 3. Stereospecific ROP of DACs.....                       | S13 |
| 3.1 General Polymerization Procedure .....               | S13 |
| 3.2 GPC traces for PM2–PM6 .....                         | S14 |
| 4. Small-Molecule Model Reaction .....                   | S16 |
| 5 Chain-Extension Experiment .....                       | S30 |
| 6. Thermal Analysis .....                                | S34 |
| 7. NMR Spectra of Homopolymers .....                     | S46 |
| 8. Specific Rotation and CD Spectra of Homopolymers..... | S60 |
| 9. Computation Details .....                             | S61 |
| 10. Reference .....                                      | S77 |

## 1. Materials and Methods

### 1.1 Materials

All Chemicals were purchased from TCI, J&K, Energy Chemical, and Adamas-beta, and were used as received without further purification.

Deuterated chloroform was purchased from Cambridge Isotope Laboratories.

All anhydrous solvents were purchased from J&K and were used as received.

### 1.2 Methods

<sup>1</sup>H NMR and <sup>13</sup>C NMR spectra were recorded on a Bruker 400 Hz (100 Hz for <sup>13</sup>C) spectrometer at ambient temperature. All <sup>1</sup>H and <sup>13</sup>C NMR spectra were referenced  $\delta$  7.26 ppm and  $\delta$  77.16 ppm for CDCl<sub>3</sub>.

The number average molecular weight ( $M_n$ ), weight-average molecular weight ( $M_w$ ), and dispersity ( $D = M_w/M_n$ ) were measured by gel permeation chromatography (GPC) using an Agilent 1200 infinity system with one guard column and two MZ-Gel LS columns (300×8.0 mm, 5  $\mu$ m) and coupled with a Wyatt Optilab refractive index detector. The analyses were carried out at 35 °C using CHCl<sub>3</sub> as the eluent at a flow rate of 1.0 mL/min.

High performance liquid chromatography (HPLC) analysis was performed on Waters e2695 system equipped with Chiralpak IC or OD-H column (Daicel Chemical Industries, LTD).

TGA analyses were recorded on a TA Q50 TGA instrument by heating the polymer samples from 20 °C to 700 °C at the rate of 10 °C/min. DSC analyses were recorded on a TA Q20 DSC instrument at a rate of 10 °C/min.

MALDI-TOF-MS analyses of low MW polymer was performed on a Bruker Autoflex Speed TOF/TOF instrument. Trans-2-[3-(4-tert-Butylphenyl)-2-methyl-2-propenylidene]malononitrile (DCTB) was used as the matrix and CF<sub>3</sub>CO<sub>2</sub>Na was used as the cationic reagent. High resolution mass (HRMS) analyses were performed on a ThermoFisher LTQ-Orbitrap XL instrument.

Specific optical rotations were recorded on a Polarimeter 341 plus instrument at 20 °C, using sodium lamp ( $\lambda = 589$  nm, 20 W). The specific rotation  $[\alpha]_D^{20}$  were calculated as follows:  $[\alpha]_D^{20} = (100 \times \alpha) / (c \times d)$ ,  $\alpha$ , optical rotation; conc, concentration in CHCl<sub>3</sub> (1 g/100 mL); d, optical tube length (dm). The circular dichroism (CD) spectra were measured in a 2.0 mm quartz cell on a JASCO J-1700 spectropolarimeter.

## 2. Synthesis of Monomers

**M1–M4, M6, (R)-M1–(R)-M4, (R)-M6, (S)-M1–(S)-M4, and (S)-M6** were synthesized according to literature procedures.<sup>1–3</sup> **M5** was synthesized according to previous report.<sup>4</sup> All data are in consistent with literatures.

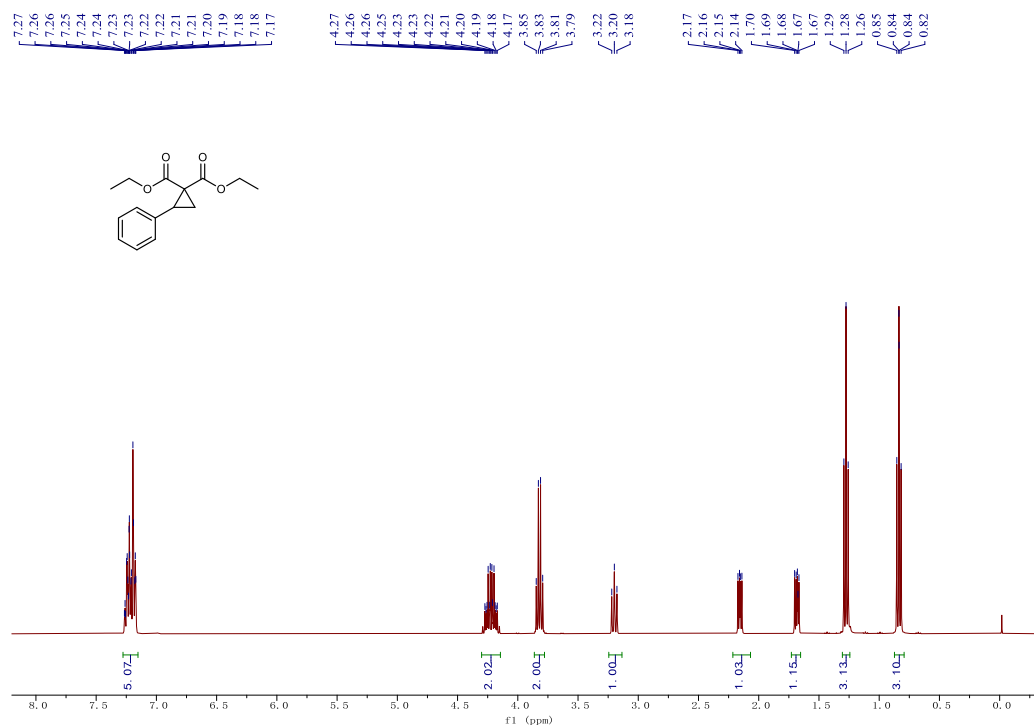

**Fig. S1** <sup>1</sup>H NMR spectrum of **M1** in CDCl<sub>3</sub>

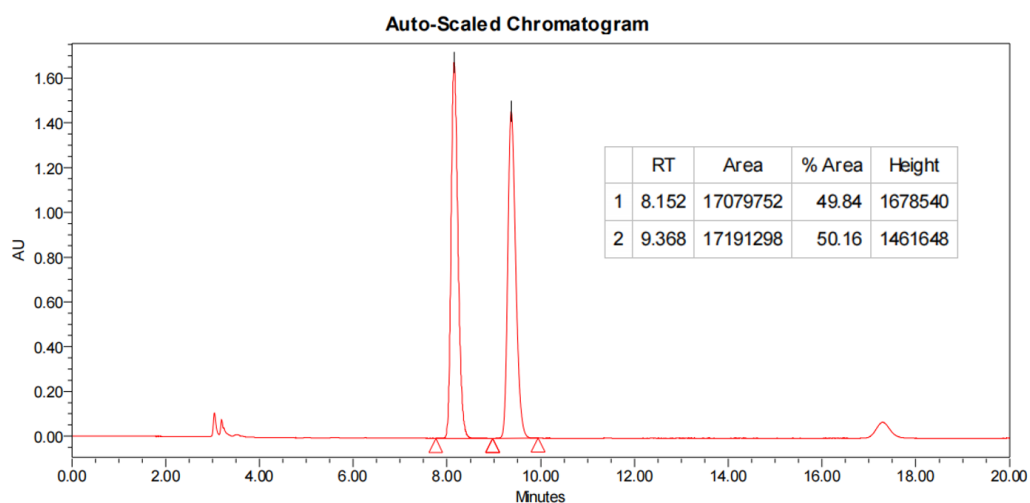

**Fig. S2** HPLC spectrum of **M1**. Chiralpak IC, hexane/isopropanol = 95/5, 1 mL/min, 30 °C, 220 nm

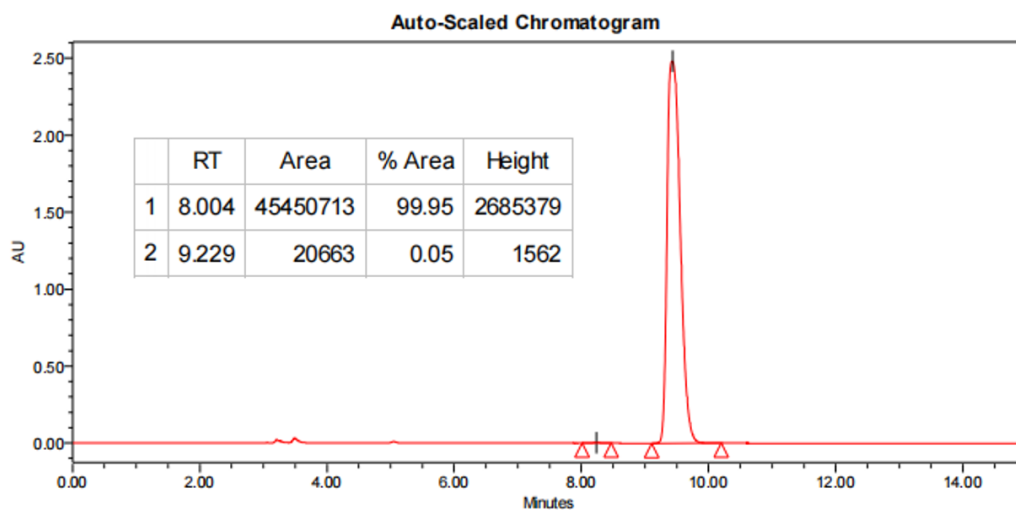

**Fig. S3** HPLC spectrum of (*R*)-**M1**. Chiralpak IC, hexane/isopropanol = 95/5, 1 mL/min, 30 °C, 220 nm

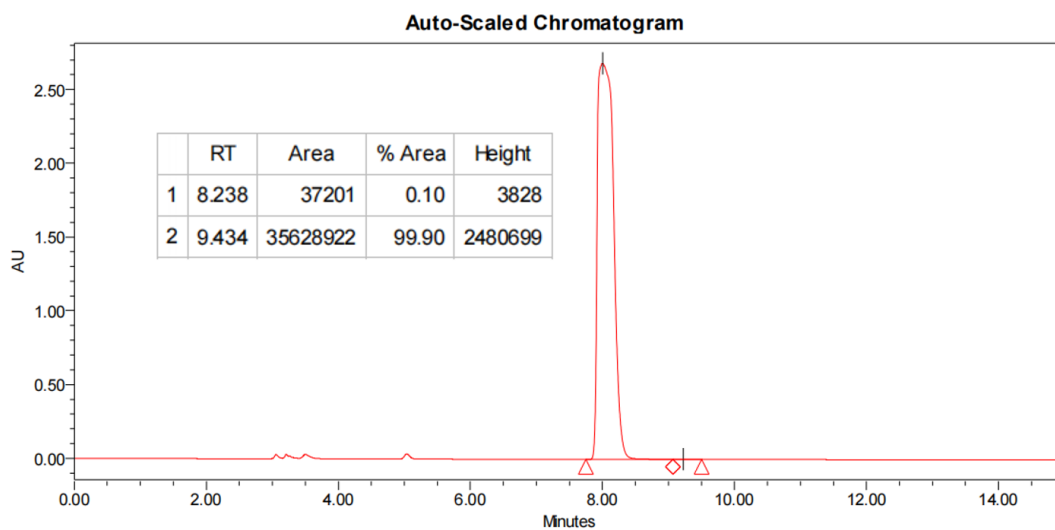

**Fig. S4** HPLC spectrum of (*S*)-**M1**. Chiralpak IC, hexane/isopropanol = 95/5, 1 mL/min, 30 °C, 220 nm

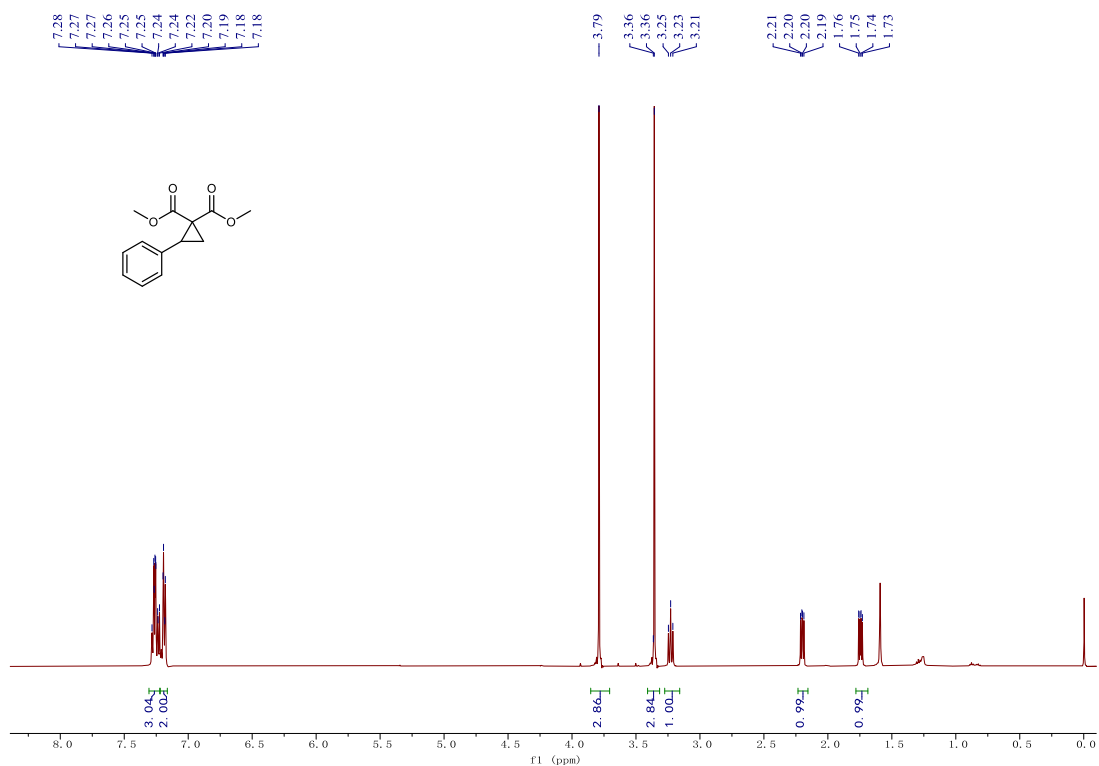

**Fig. S5**  $^1\text{H}$  NMR spectrum of **M2** in  $\text{CDCl}_3$

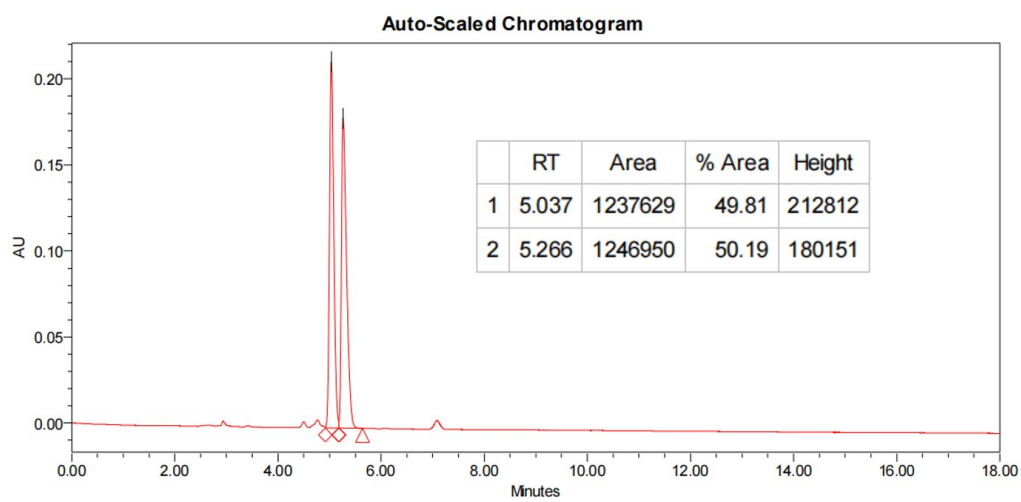

**Fig. S6** HPLC spectrum of **M2**. Chiralpak OD, hexane/isopropanol = 90/10, 1 mL/min, 30 °C, 254 nm

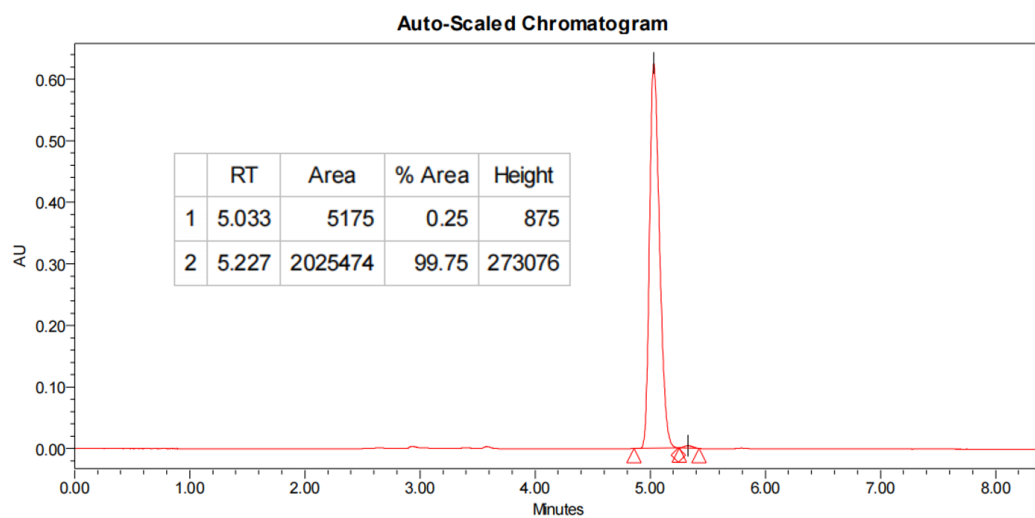

**Fig. S7** HPLC spectrum of (*R*)-**M2**. Chiralpak OD, hexane/isopropanol = 90/10, 1 mL/min, 30 °C, 254 nm

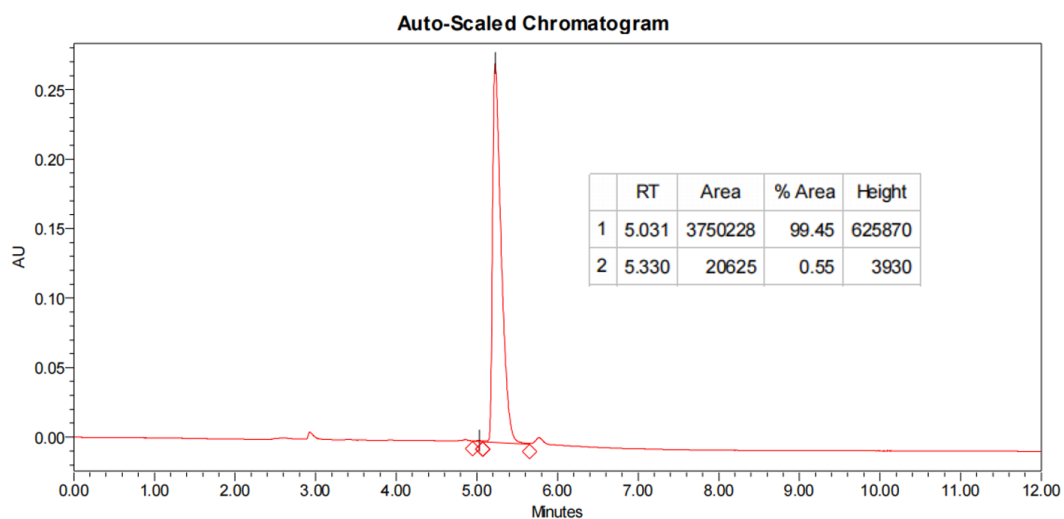

**Fig. S8** HPLC spectrum of (*S*)-**M2**. Chiralpak OD, hexane/isopropanol = 90/10, 1 mL/min, 30 °C, 254 nm

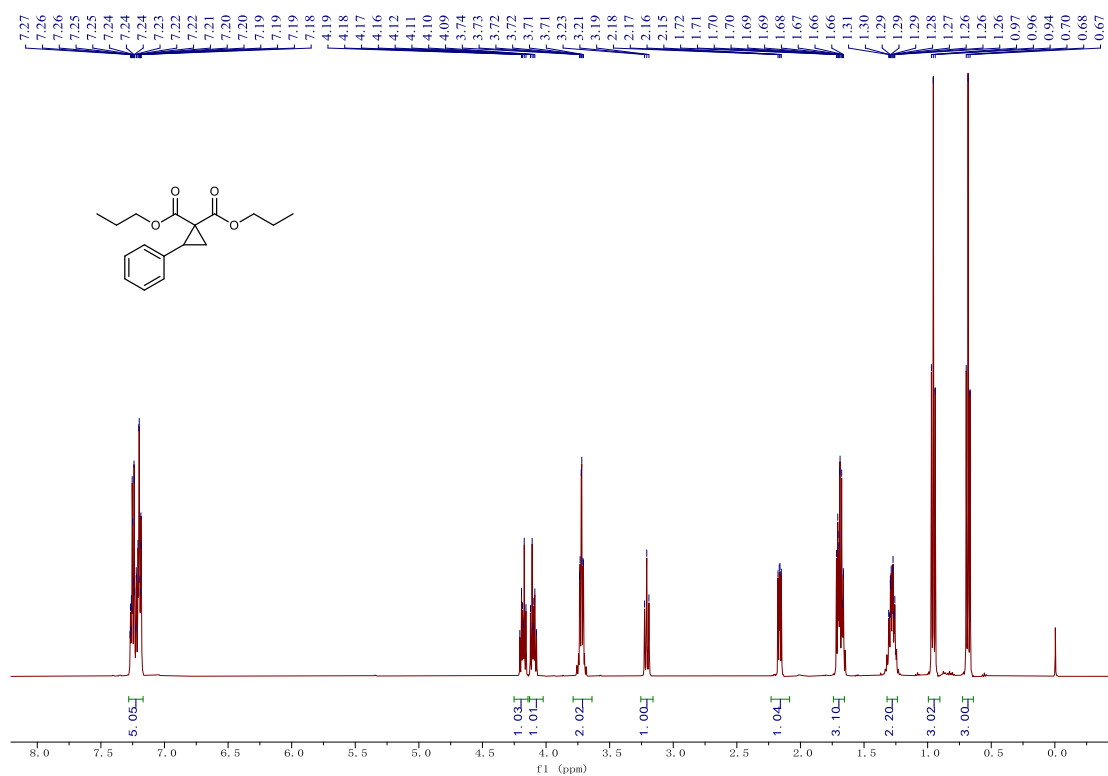

Fig. S9  $^1\text{H}$  NMR spectrum of M3 in  $\text{CDCl}_3$

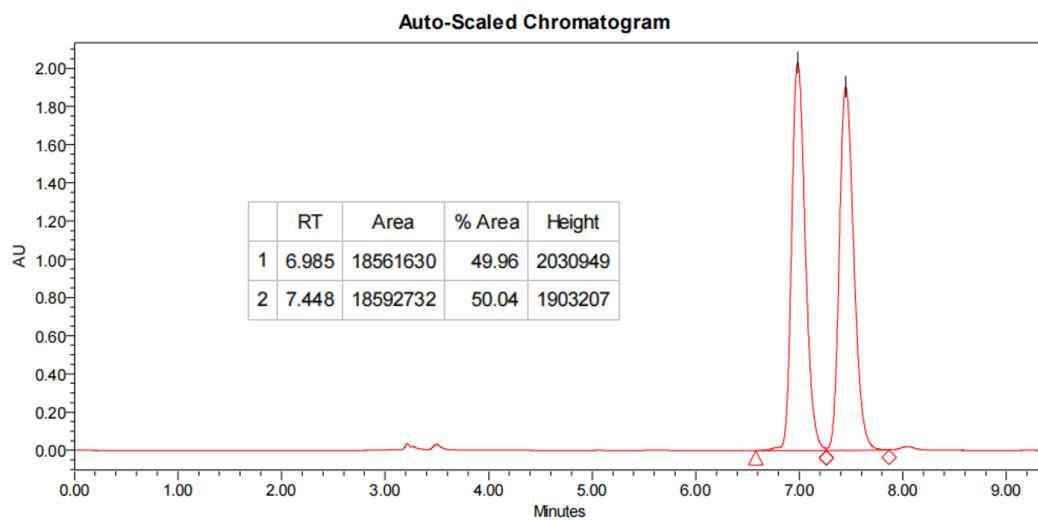

Fig. S10 HPLC spectrum of M3. Chiralpak IC, hexane/isopropanol = 95/5, 1 mL/min, 30 °C, 220 nm

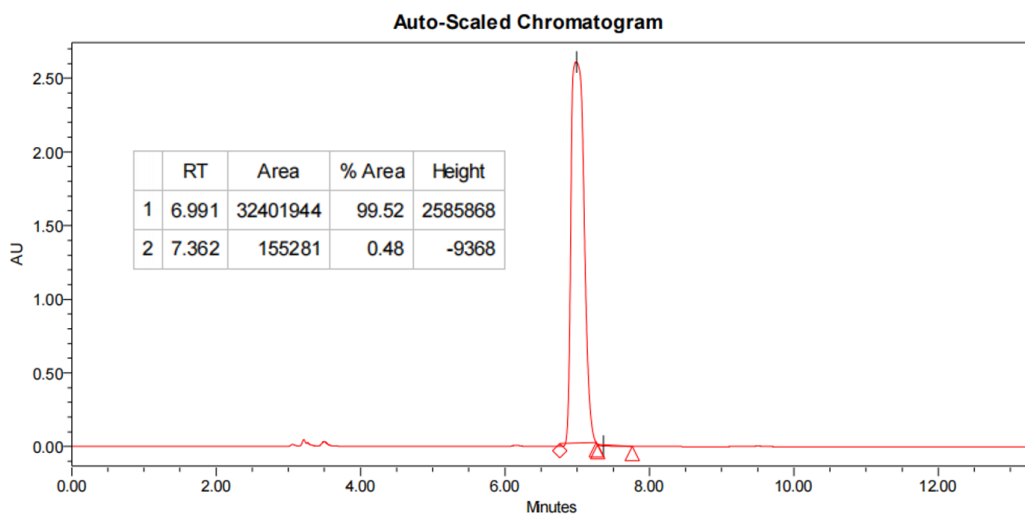

**Fig. S11** HPLC spectrum of (*R*)-**M3**. Chiralpak IC, hexane/isopropanol = 95/5, 1 mL/min, 30 °C, 220 nm

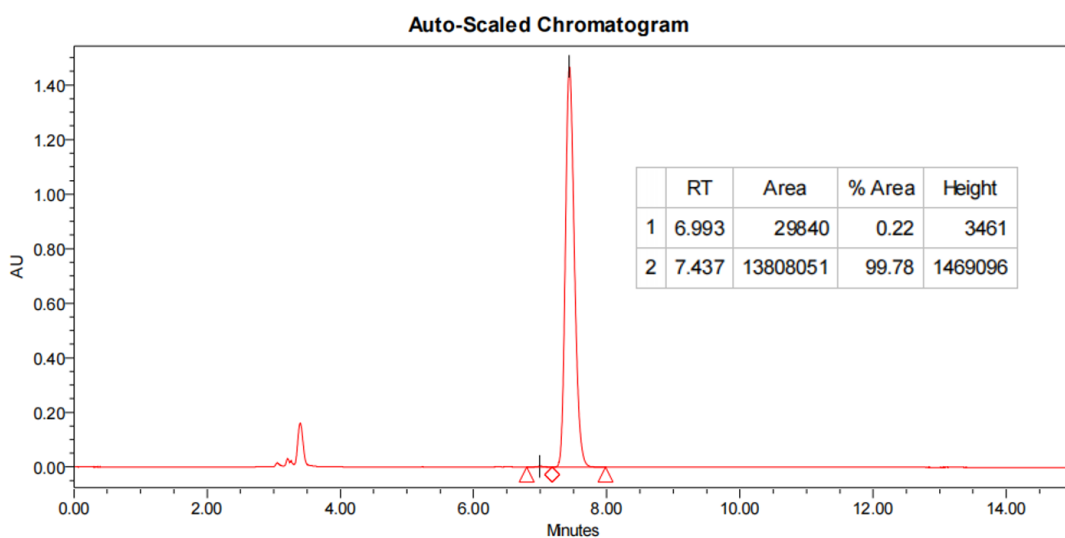

**Fig. S12** HPLC spectrum of (*S*)-**M3**. Chiralpak IC, hexane/isopropanol = 95/5, 1 mL/min, 30 °C, 220 nm

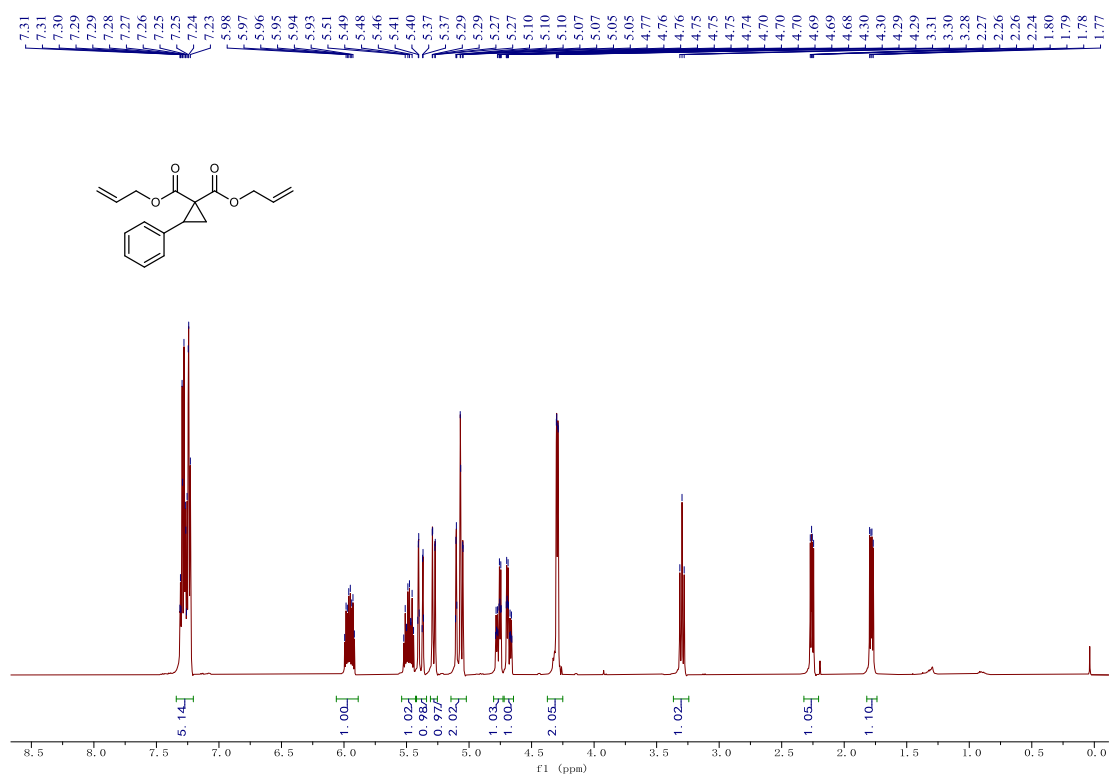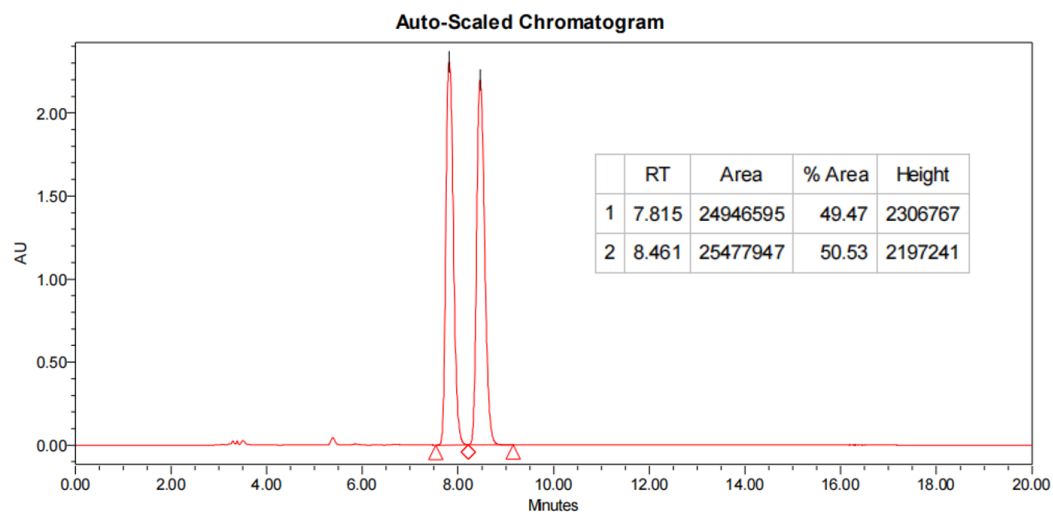

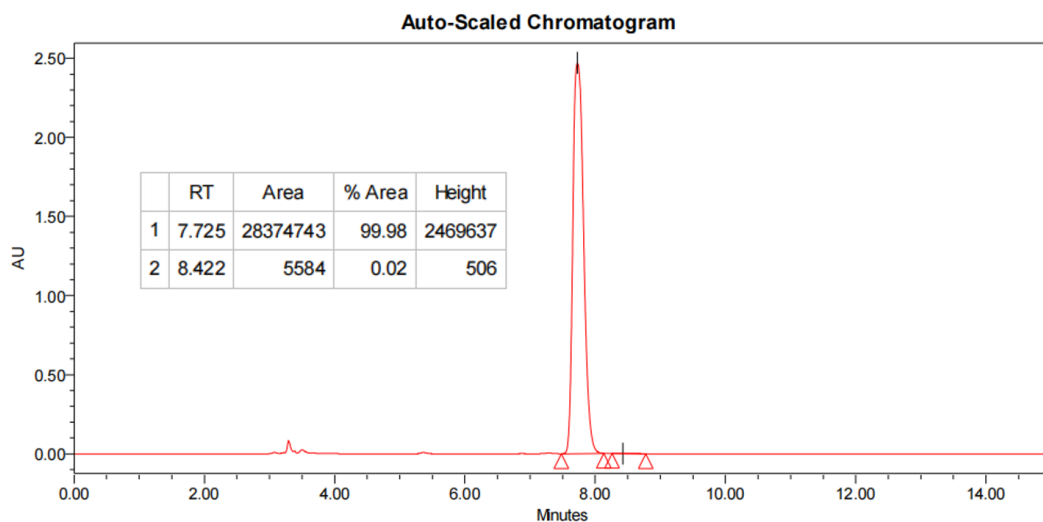

**Fig. S15** HPLC spectrum of (*R*)-**M4**. Chiralpak IC, hexane/isopropanol = 97/3, 1 mL/min, 30 °C, 220 nm

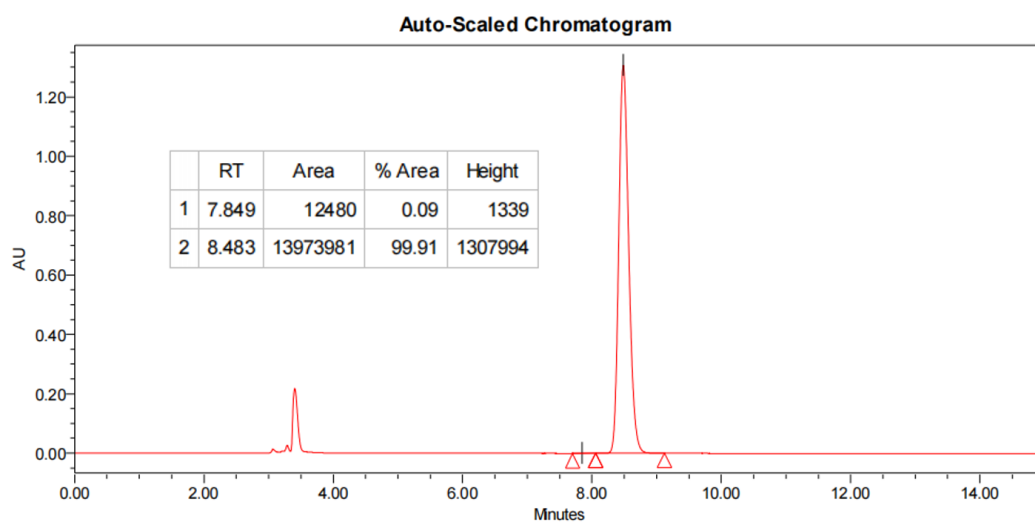

**Fig. S16** HPLC spectrum of (*S*)-**M4**. Chiralpak IC, hexane/isopropanol = 97/3, 1 mL/min, 30 °C, 220 nm

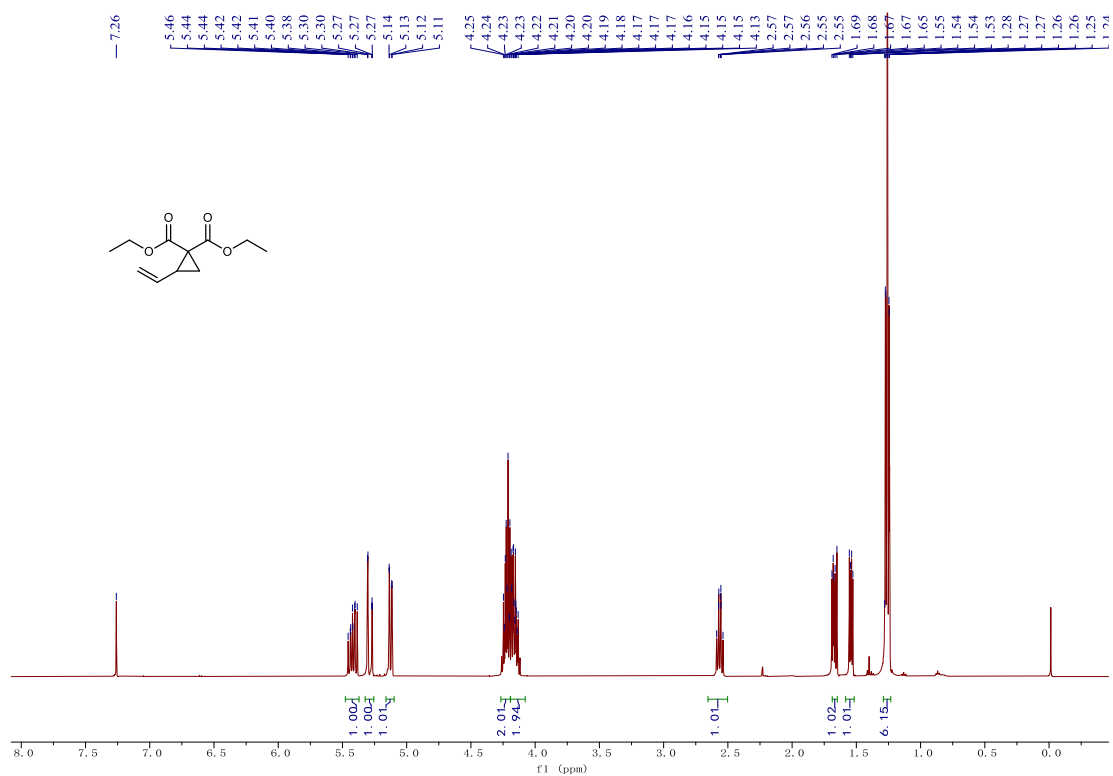

**Fig. S17**  $^1\text{H}$  NMR spectrum of **M6** in  $\text{CDCl}_3$

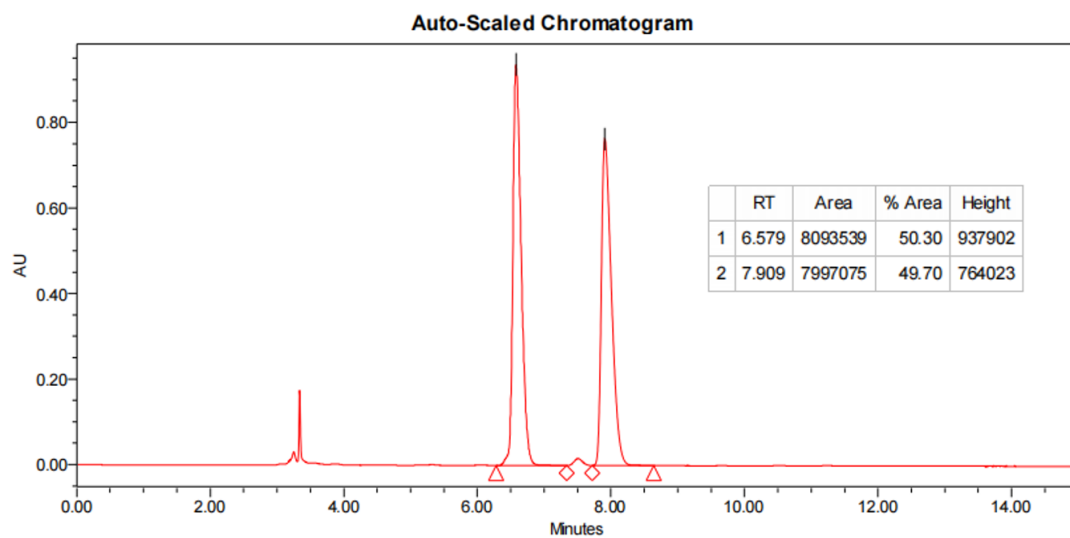

**Fig. S18** HPLC spectrum of **M6**. Chiralpak IC, hexane/isopropanol = 97/3, 1 mL/min, 30 °C, 220 nm

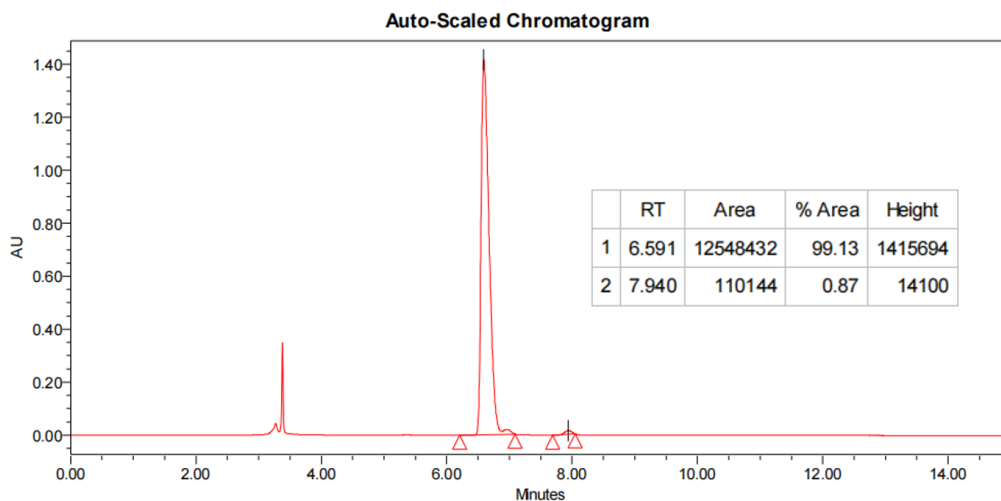

**Fig. S19** HPLC spectrum of (*R*)-**M6**. Chiralpak IC, hexane/isopropanol = 97/3, 1 mL/min, 30 °C, 220 nm

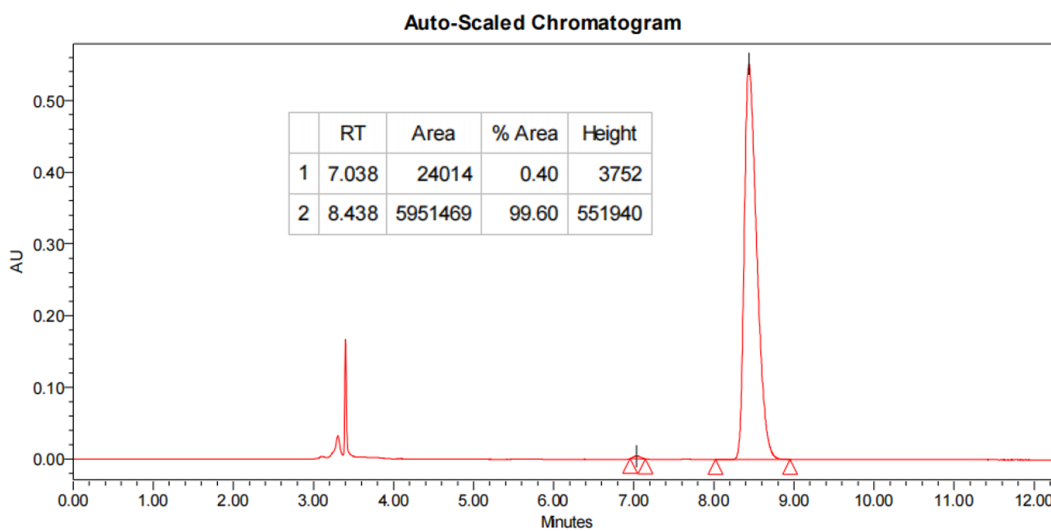

**Fig. S20** HPLC spectrum of (*S*)-**M6**. Chiralpak IC, hexane/isopropanol = 97/3, 1 mL/min, 30 °C, 220 nm

### 3. Stereospecific ROP of DACs

#### 3.1 General Polymerization Procedure

In a N<sub>2</sub>-filled glove box, to an oven-dried 10 mL Schlenk tube containing a magnetic stir bar were added monomer (0.4 mmol), anhydrous MeCN (0.4 mL), dry MgBr<sub>2</sub> (0.02 mmol), DBU (0.02 mmol), and initiator (0.02 mmol). The reaction was stirred at 50 °C for 24 h. An aliquot was taken for <sup>1</sup>H NMR analysis to determine the monomer conversion, then dried under vacuum for direct GPC analysis to obtain the M<sub>n</sub> and Đ. For further purification, the reaction mixture was slowly added into 10.0 mL of hexane while stirring at room temperature. The precipitated polymer was collected by vacuum filtration, washed with hexane (5.0 mL × 2) and dried overnight under vacuum at 50 °C to a constant weight.

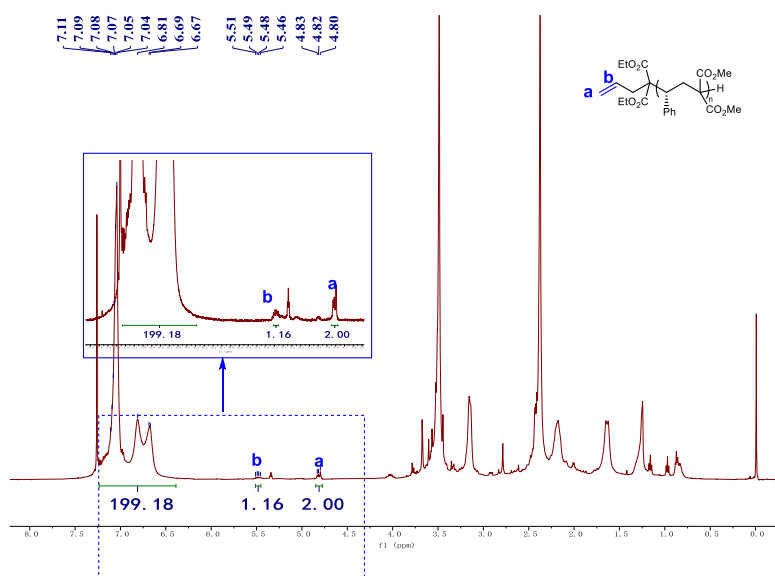

Fig. S21 <sup>1</sup>H NMR of P[(S)-M2] in CDCl<sub>3</sub>.  $M_{n,NMR} = 199.18/5 * 234.25 + 220.23 = 9.6$  kDa

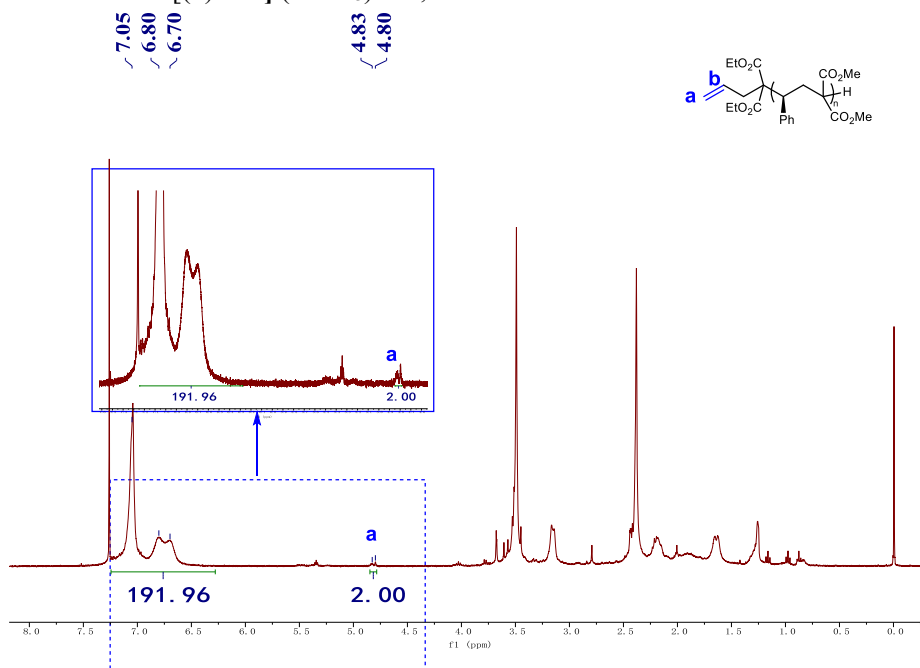

Fig. S22 <sup>1</sup>H NMR of P[(R)-M2] in CDCl<sub>3</sub>,  $M_{n,NMR} = 191.96/5 * 234.25 + 220.23 = 9.1$  kDa

**Table S1.** Monomer Racemization

| entry | monomer (ee%)         | time (min) | conv. (%) | ee% of recovered monomer |
|-------|-----------------------|------------|-----------|--------------------------|
| 1     | ( <i>S</i> )-M1 (>99) | 150        | 48        | >99                      |
| 2     | ( <i>S</i> )-M2 (>99) | 110        | 74        | >99                      |
| 3     | ( <i>S</i> )-M3 (>99) | 180        | 36        | >99                      |
| 4     | ( <i>S</i> )-M4 (>99) | 120        | 62        | >99                      |
| 5     | ( <i>S</i> )-M6 (>99) | 90         | 45        | 38                       |

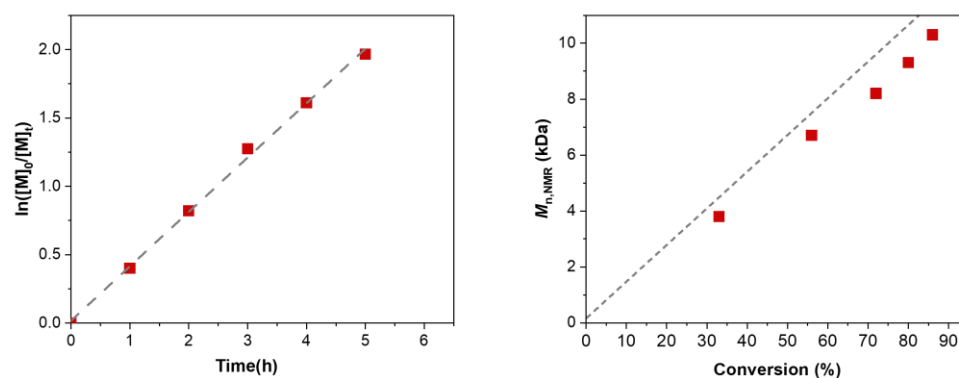**Fig. S23** Progress analysis for the polymerization of (*S*)-M1 under conditions of [(*S*)-M1]/[diethyl 2-allylmalonate]/[MgBr<sub>2</sub>]/[DBU] = 100/2/5/5 in MeCN at 50°C.

### 3.2 GPC traces for PM2–PM6

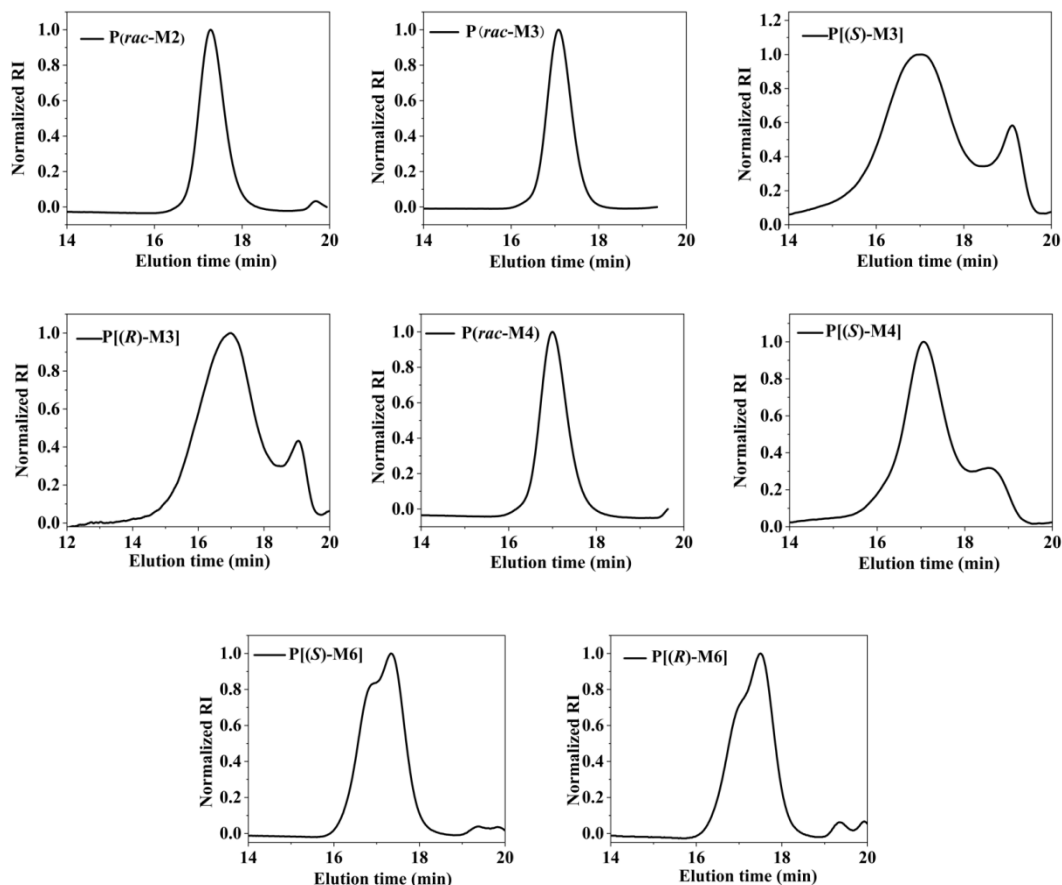

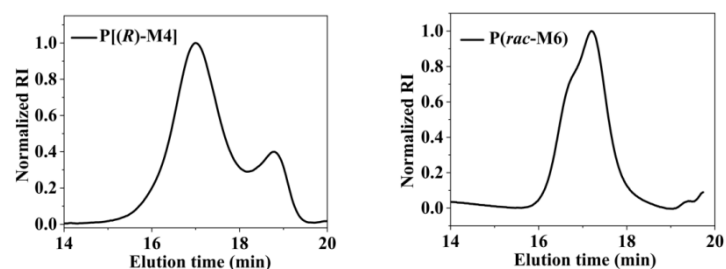

The low-MW tail ( $M_n \sim 3$  kDa) of P[(S)-M1] was separated via diffusion dialysis in dichloromethane. The mass cutoff was 3.5 kDa. The obtained low-MW polymer was characterized by MALDI-TOF mass spectrometry, which showed a major set of peaks that supported the high fidelity of diethyl malonate chain ends, and a minor set of peaks that corresponded to water-initiation and Dieckmann condensation-type backbiting.

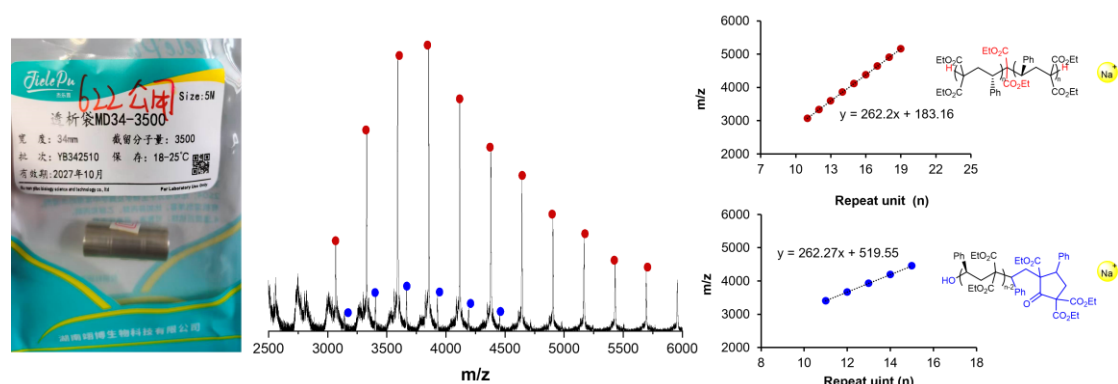

**Fig. S24** Separation and characterization of low-MW P[(S)-M1].

Although the MALDI-TOF mass analysis for the high-MW (>15 kDa) polymer was unsuccessful, major peaks in their  $^1\text{H}$  NMR spectra were almost identical—at least the repeating units remain the same.

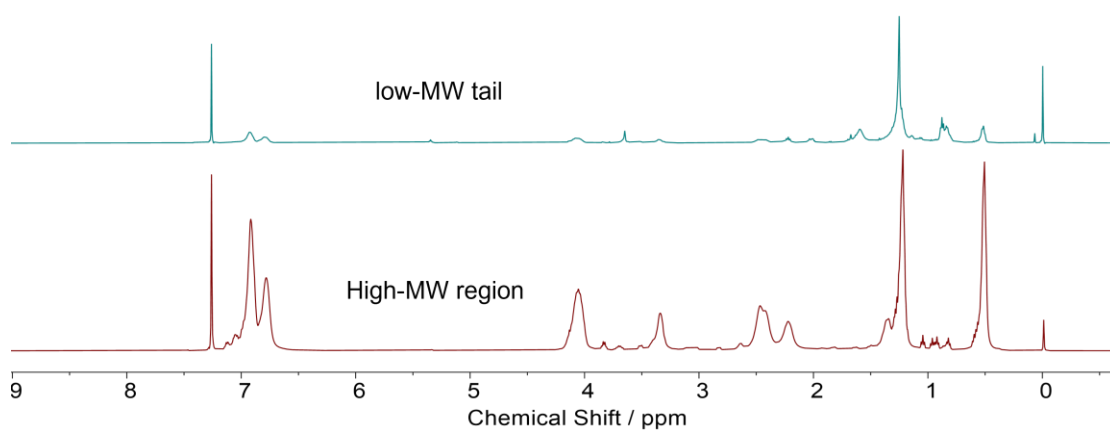

**Fig. S25** Comparison of the  $^1\text{H}$  NMR spectra of low- and high-MW P[(S)-M1].

## 4. Small-Molecule Model Reaction

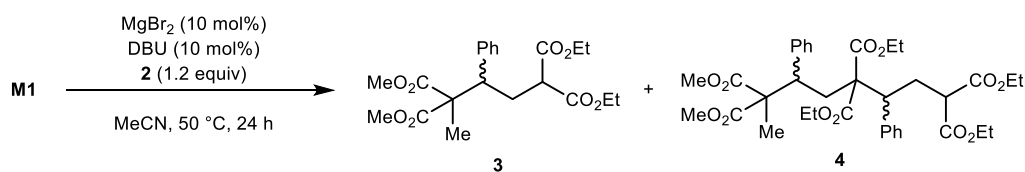

To an oven-dried 10 mL Schlenk tube equipped with a magnetic stir bar in a  $\text{N}_2$ -filled glove box, **M1** (1.0 equiv, 0.3 mmol),  $\text{MgBr}_2$  (0.1 equiv, 0.03 mmol), DBU (0.1 equiv, 0.03 mmol), diethyl methylmalonate (1.2 equiv, 0.36 mmol) and anhydrous MeCN (1.0 mL) were sequentially added. The tube was stirred at 50 °C for 24 h. Then the solvent was removed under reduced pressure and the residue was purified by column chromatography on silica gel (*n*-pentane/EtOAc = 5:1) to give **3** as a colorless liquid (88mg, 72% yield) and **4** as a colorless liquid (28mg, 14% yield).

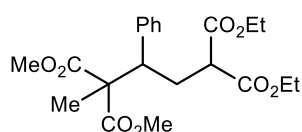

### Tetraethyl 3-phenylpentane-1,1,4,4-tetracarboxylate (**3**)

Colorless liquid.  $^1\text{H NMR}$  (400 MHz,  $\text{CDCl}_3$ )  $\delta$  7.37 – 7.27 (m, 3H), 7.20 (dd,  $J = 7.9, 1.7$  Hz, 2H), 4.27 (qd,  $J = 7.1, 2.2$  Hz, 2H), 4.01 (p,  $J = 7.0$  Hz, 2H), 3.79 (s, 3H), 3.61 (s, 3H), 3.51 (dd,  $J = 12.1, 2.9$  Hz, 1H), 3.06 (dd,  $J = 10.2, 4.6$  Hz, 1H), 2.59 – 2.39 (m, 2H), 1.44 (s, 3H), 1.33 (t,  $J = 7.1$  Hz, 3H), 1.18 (t,  $J = 7.1$  Hz, 3H).  $^{13}\text{C NMR}$  (126 MHz,  $\text{CDCl}_3$ )  $\delta$  171.3, 169.1, 168.9, 137.4, 129.5, 128.3, 127.6, 61.2, 61.2, 58.3, 52.4, 52.3, 50.5, 47.8, 30.2, 17.7, 14.0, 13.8. **HRMS:** (ESI)  $m/z$ :  $[\text{M}+\text{H}]^+$  Calcd for  $\text{C}_{21}\text{H}_{29}\text{O}_8$  409.1857, found 409.1858.

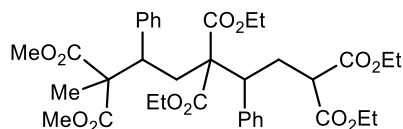

### Hexaethyl 3,6-diphenyloctane-1,1,4,4,7,7-hexacarboxylate (**4**)

$^1\text{H NMR}$  (500 MHz,  $\text{CDCl}_3$ )  $\delta$  7.31 – 6.99 (m, 10H), 4.36 – 4.10 (m, 3H), 4.01 – 3.83 (m, 3H), 3.62 – 3.54 (m, 4H), 3.43 (d,  $J = 52.7$  Hz, 4H), 3.33 – 3.02 (m, 2H), 2.92 (ddd,  $J = 9.9, 4.8, 2.0$  Hz, 1H), 2.73 – 2.45 (m, 2H), 2.39 – 2.11 (m, 2H), 1.31 (dd,  $J = 25.4, 7.1$  Hz, 3H), 1.27 – 1.22 (m, 3H), 1.20 (d,  $J = 7.2$  Hz, 3H), 1.10 (td,  $J = 7.1, 3.4$  Hz, 3H), 0.98 (q,  $J = 7.4$  Hz, 3H).  $^{13}\text{C NMR}$  (126 MHz,  $\text{CDCl}_3$ )  $\delta$  171.5, 171.5, 171.4, 171.2, 169.9, 169.8, 169.7, 169.5, 169.2, 169.1, 169.0, 138.3, 138.2, 138.1, 137.6, 128.2, 128.0, 127.5, 127.5, 127.4, 127.1, 127.0, 61.2, 61.2, 61.2, 61.1, 61.0, 60.8, 60.7, 60.6, 59.6, 59.6, 52.3, 52.2, 52.0, 52.0, 51.0, 50.8, 50.7, 48.9, 47.3, 46.6, 37.5, 34.7, 31.5, 31.3, 20.0, 19.3, 14.1, 13.8, 13.5, 13.4. **HRMS:** (ESI)  $m/z$ :  $[\text{M}+\text{H}]^+$  Calcd for  $\text{C}_{36}\text{H}_{47}\text{O}_{12}$  671.3062, found 671.3063.

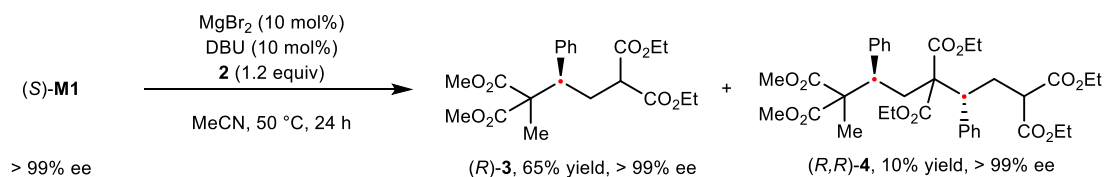

To an oven-dried 10 mL Schlenk tube equipped with a magnetic stir bar in a N<sub>2</sub>-filled glove box, (*S*)-**M1** (1.0 equiv, 0.3 mmol), MgBr<sub>2</sub> (0.1 equiv, 0.03 mmol), DBU (0.1 equiv, 0.03 mmol), dimethyl methylmalonate (1.2 equiv, 0.36 mmol) and anhydrous MeCN (1.0 mL) were sequentially added. The tube was stirred at 50 °C for 24 h. Then the solvent was removed under reduced pressure and the residue was purified by column chromatography on silica gel (*n*-pentane/EtOAc = 5:1) to give (*R*)-**3** as a colorless liquid (80 mg, 65% yield, 99% ee) and (*R,R*)-**4** as a colorless liquid (21 mg, 10% yield).

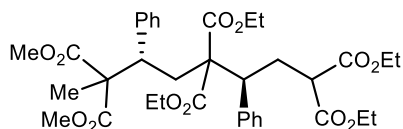

#### Hexaethyl (3*S*,6*S*)-3,6-diphenyloctane-1,1,4,7,7-hexacarboxylate (*R,R*)-**4**

<sup>1</sup>H NMR (400 MHz, CDCl<sub>3</sub>) δ 7.31 – 7.03 (m, 10H), 4.31 – 4.09 (m, 4H), 3.90 (qd, *J* = 7.1, 1.3 Hz, 2H), 3.49 (s, 4H), 3.38 (s, 3H), 3.27 – 3.16 (m, 2H), 3.07 (dd, *J* = 10.7, 7.2 Hz, 1H), 2.93 (dd, *J* = 9.9, 4.7 Hz, 1H), 2.60 (ddd, *J* = 14.2, 12.2, 4.8 Hz, 1H), 2.50 (dd, *J* = 14.8, 11.0 Hz, 1H), 2.34 (ddd, *J* = 14.2, 9.9, 2.5 Hz, 1H), 2.15 (dd, *J* = 14.8, 1.3 Hz, 1H), 1.33 (t, *J* = 7.1 Hz, 3H), 1.25 (t, *J* = 7.1 Hz, 3H), 1.18 (s, 3H), 1.10 (t, *J* = 7.1 Hz, 3H), 0.99 (t, *J* = 7.1 Hz, 3H). <sup>13</sup>C NMR (101 MHz, CDCl<sub>3</sub>) δ 171.5, 171.2, 169.9, 169.5, 169.2, 169.0, 138.3, 137.7, 128.2, 127.5, 127.4, 127.1, 61.2, 61.2, 61.0, 60.8, 59.6, 52.0, 52.0, 51.0, 50.8, 47.3, 37.5, 31.3, 20.0, 14.1, 13.8, 13.4. HRMS: (ESI) *m/z*: [M+H]<sup>+</sup> Calcd for C<sub>36</sub>H<sub>47</sub>O<sub>12</sub> 671.3062, found 671.3063.

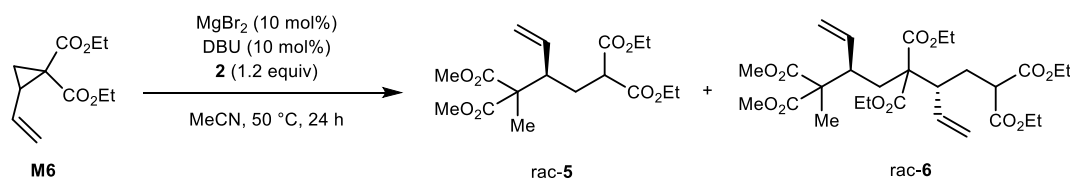

To an oven-dried 10 mL Schlenk tube equipped with a magnetic stir bar in a N<sub>2</sub>-filled glove box, **M6** (1.0 equiv, 0.3 mmol), MgBr<sub>2</sub> (0.1 equiv, 0.03 mmol), DBU (0.1 equiv, 0.03 mmol), diethyl methylmalonate (1.2 equiv, 0.36 mmol) and anhydrous MeCN (1.0 mL) were sequentially added. The tube was stirred at 50 °C for 24 h. Then the solvent was removed under reduced pressure and the residue was purified by column chromatography on silica gel (*n*-pentane/EtOAc = 5:1) to give *rac*-**5** as a colorless liquid (43 mg, 40% yield) and *rac*-**6** as a colorless liquid (19 mg, 11% yield).

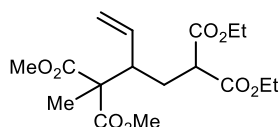

#### Tetraethyl 3-vinylpentane-1,1,4-tetracarboxylate (*rac*-**5**)

<sup>1</sup>H NMR (400 MHz, CDCl<sub>3</sub>) δ 5.58 (dt, *J* = 16.9, 10.0 Hz, 1H), 5.19 – 5.02 (m, 2H), 4.21 (qd, *J* = 7.1, 1.1 Hz, 2H), 4.12 (tq, *J* = 7.1, 3.5 Hz, 2H), 3.67 (d, *J* = 11.1 Hz, 6H), 3.32 (dd, *J* = 10.4, 4.3 Hz, 1H), 2.68 (ddd, *J* = 12.0, 9.9, 2.3 Hz, 1H), 2.11 (ddd, *J* = 13.7, 10.5, 2.3 Hz, 1H), 1.89 (ddd, *J* = 13.7, 11.7, 4.3 Hz, 1H), 1.39 (s, 3H), 1.24 (dt, *J* = 19.2, 7.1 Hz, 6H). <sup>13</sup>C NMR (126 MHz, CDCl<sub>3</sub>) δ 171.3, 171.2, 169.3, 168.9, 135.5, 120.1, 61.4, 61.3, 57.4, 52.4, 52.4, 50.1, 47.2, 28.9, 17.4, 14.0, 13.9. HRMS: (ESI) *m/z*: [M+H]<sup>+</sup> Calcd for C<sub>17</sub>H<sub>27</sub>O<sub>8</sub> 359.1700, found 359.1701.



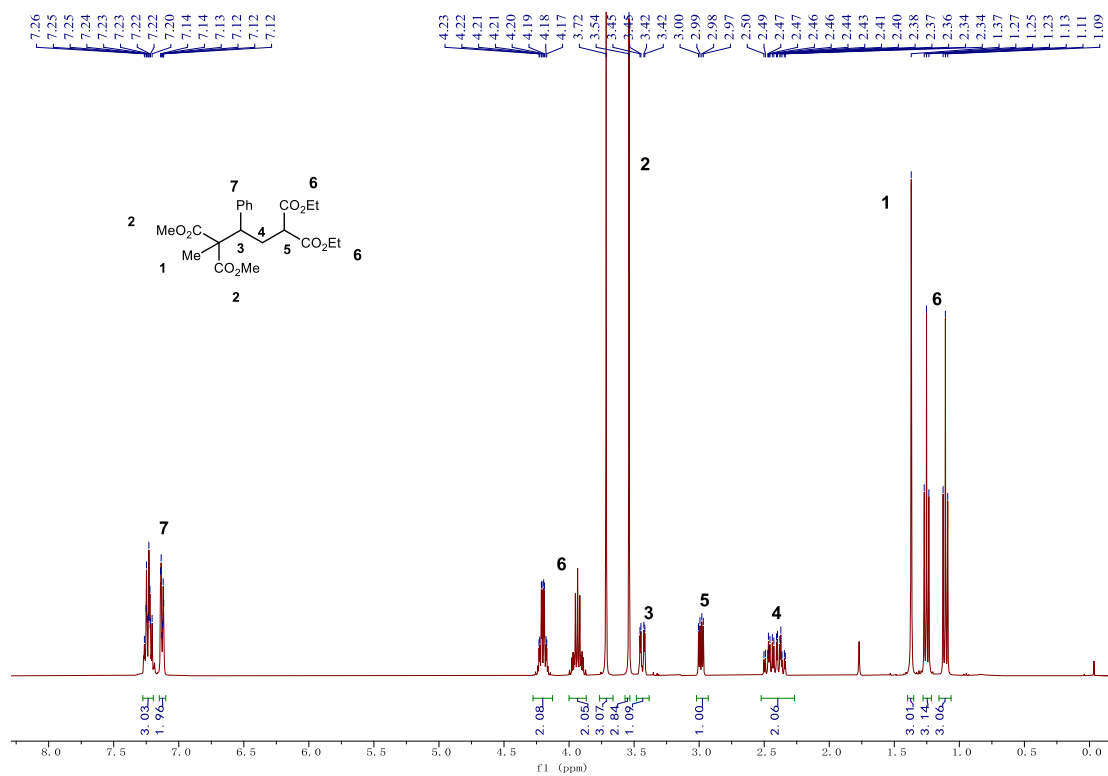

**Fig. S26** <sup>1</sup>H NMR spectrum of **3** in CDCl<sub>3</sub>

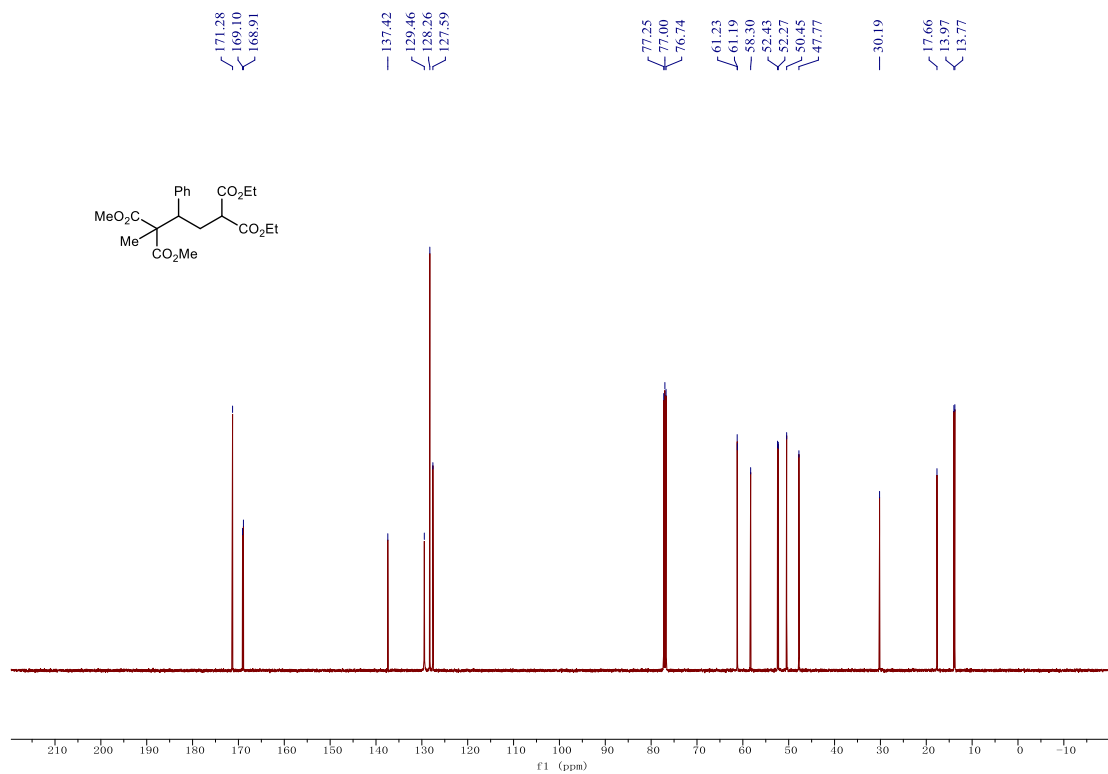

**Fig. S27** <sup>13</sup>C NMR spectrum of **3** in CDCl<sub>3</sub>

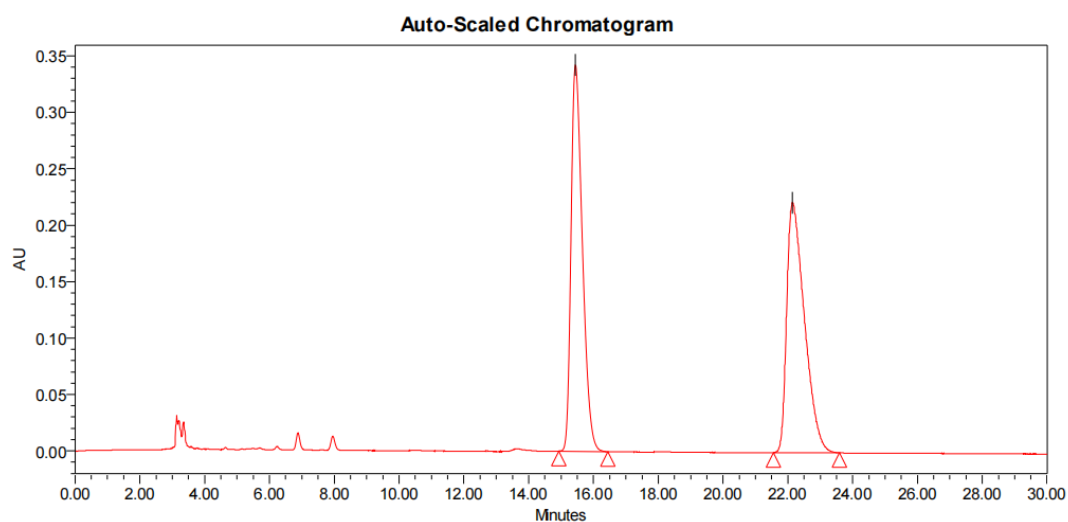

|   | RT     | Area    | % Area | Height |
|---|--------|---------|--------|--------|
| 1 | 15.442 | 8329653 | 49.71  | 342337 |
| 2 | 22.143 | 8426674 | 50.29  | 221491 |

**Fig. S28** HPLC spectrum of **3**. Chiralpak IC, hexane/isopropanol = 90/10, 1 mL/min, 30 °C, 220 nm

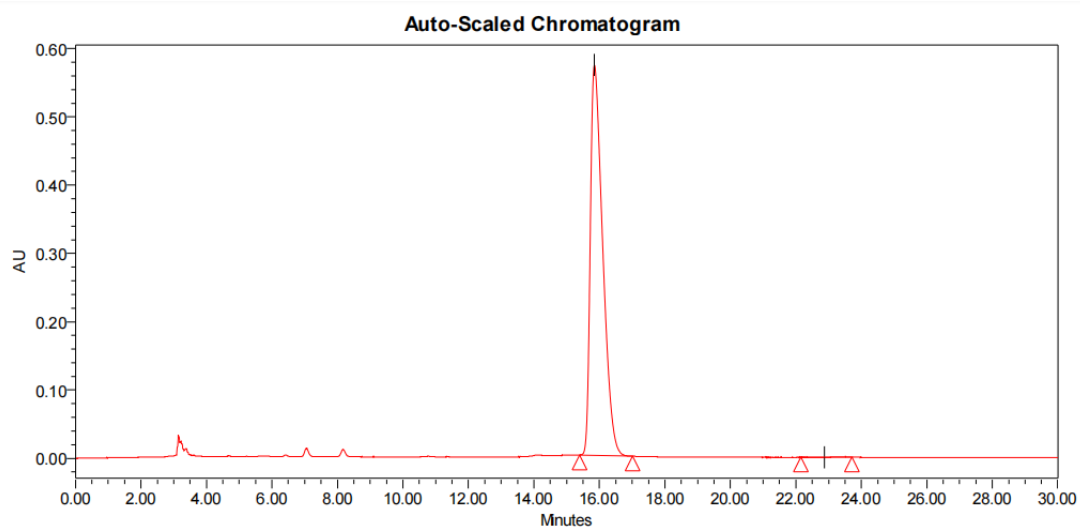

|   | RT     | Area     | % Area | Height |
|---|--------|----------|--------|--------|
| 1 | 15.848 | 15025002 | 99.90  | 571768 |
| 2 | 22.867 | 15195    | 0.10   | -303   |

**Fig. S29** HPLC spectrum of (*R*)-**3**. Chiralpak IC, hexane/isopropanol = 90/10, 1 mL/min, 30 °C, 220 nm

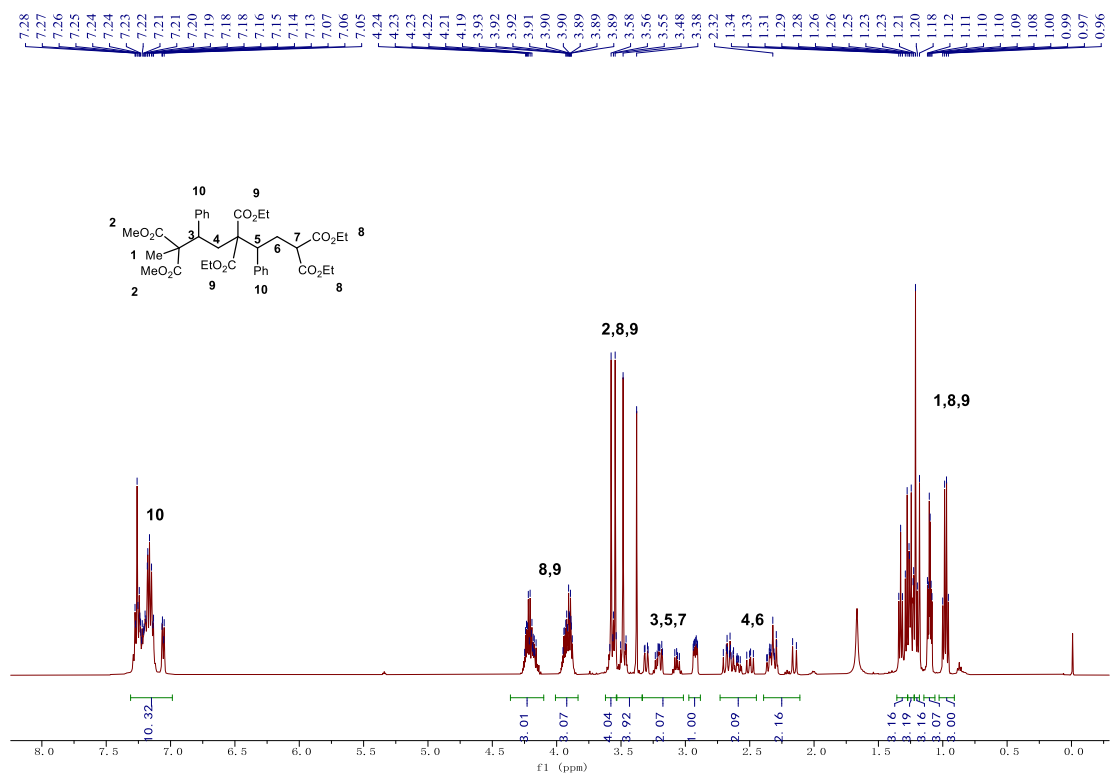

Fig. S30 <sup>1</sup>H NMR spectrum of 4 in CDCl<sub>3</sub>

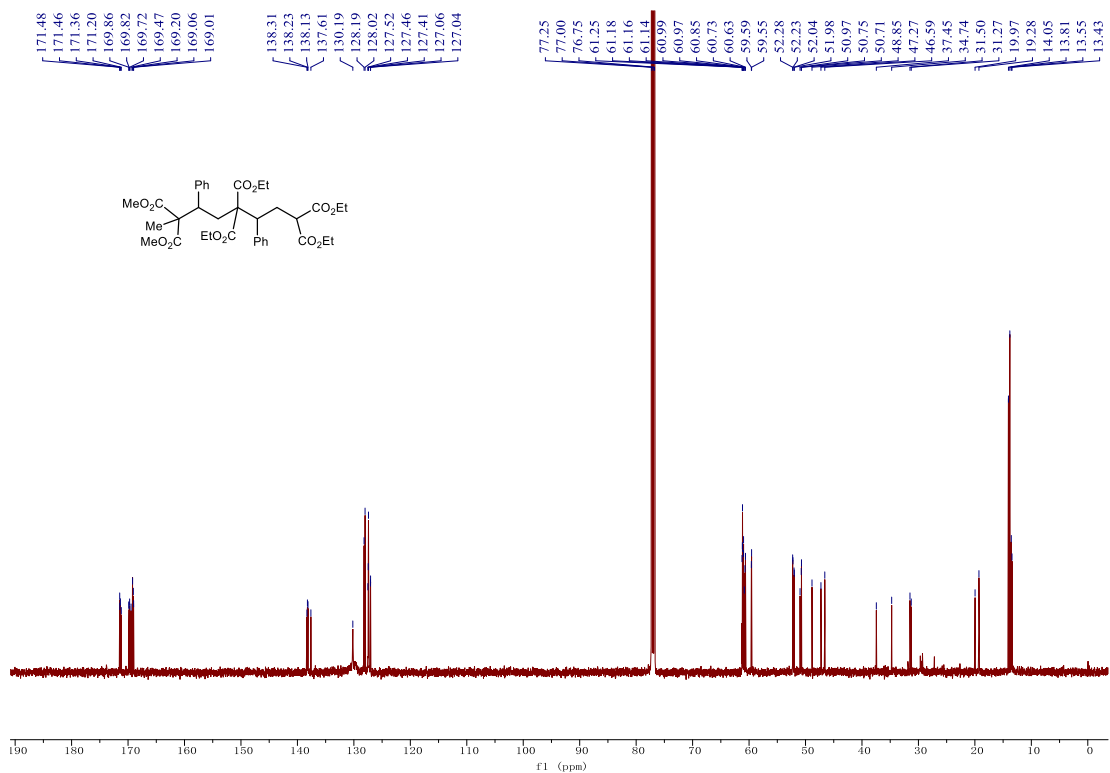

Fig. S31 <sup>13</sup>C NMR spectrum of 4 in CDCl<sub>3</sub>



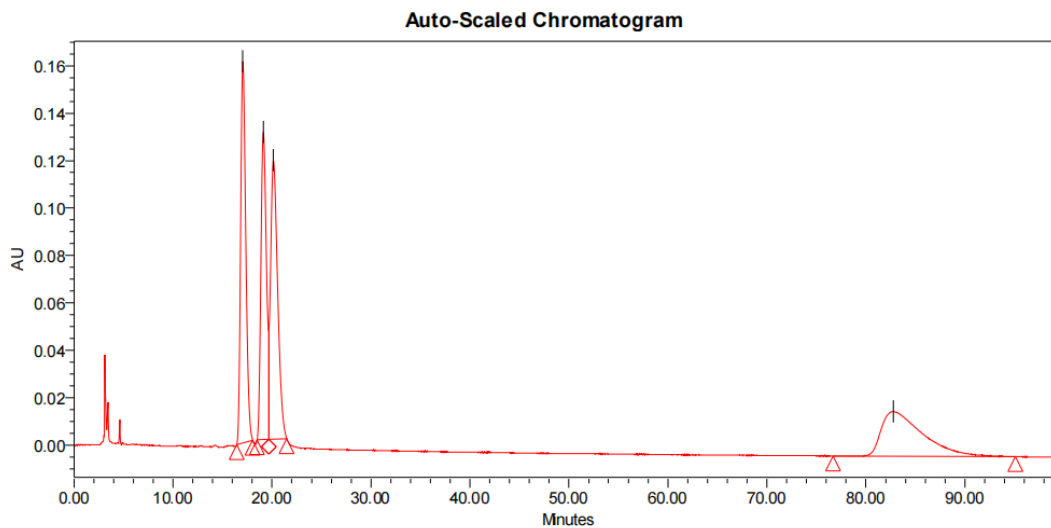

|   | RT     | Area    | % Area | Height |
|---|--------|---------|--------|--------|
| 1 | 17.047 | 5769474 | 26.04  | 160976 |
| 2 | 19.119 | 4982597 | 22.48  | 129711 |
| 3 | 20.140 | 5924686 | 26.74  | 117625 |
| 4 | 82.790 | 5483313 | 24.74  | 18823  |

**Fig. S34** HPLC spectrum of **4**. Chiralpak IC, hexane/isopropanol = 90/10, 1 mL/min, 30 °C, 220 nm

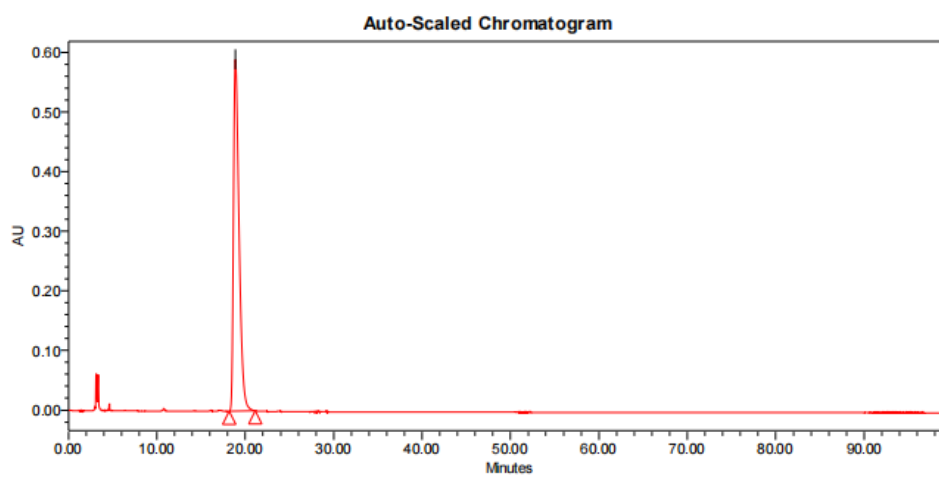

|   | RT     | Area     | % Area | Height |
|---|--------|----------|--------|--------|
| 1 | 18.879 | 25848769 | 100.00 | 590150 |

**Fig. S35** HPLC spectrum of (*R,R*)-**4**. Chiralpak IC, hexane/isopropanol = 90/10, 1 mL/min, 30 °C, 220 nm

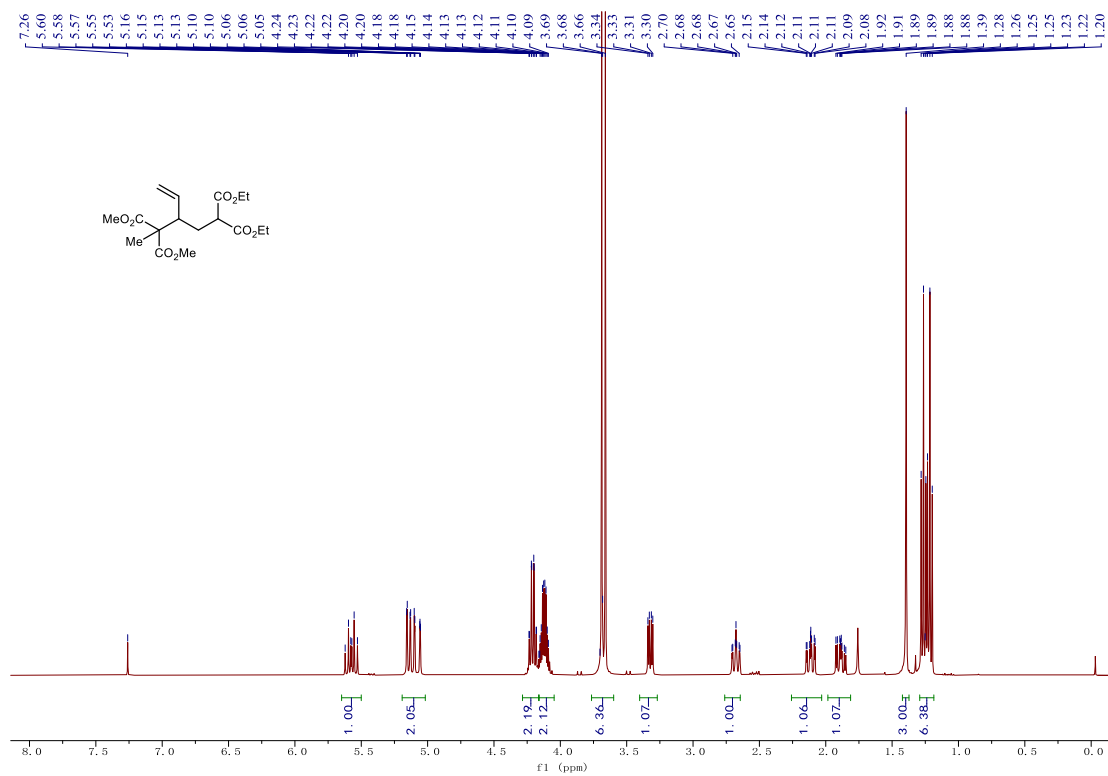

Fig. S36 <sup>1</sup>H NMR spectrum of *rac-5* in CDCl<sub>3</sub>

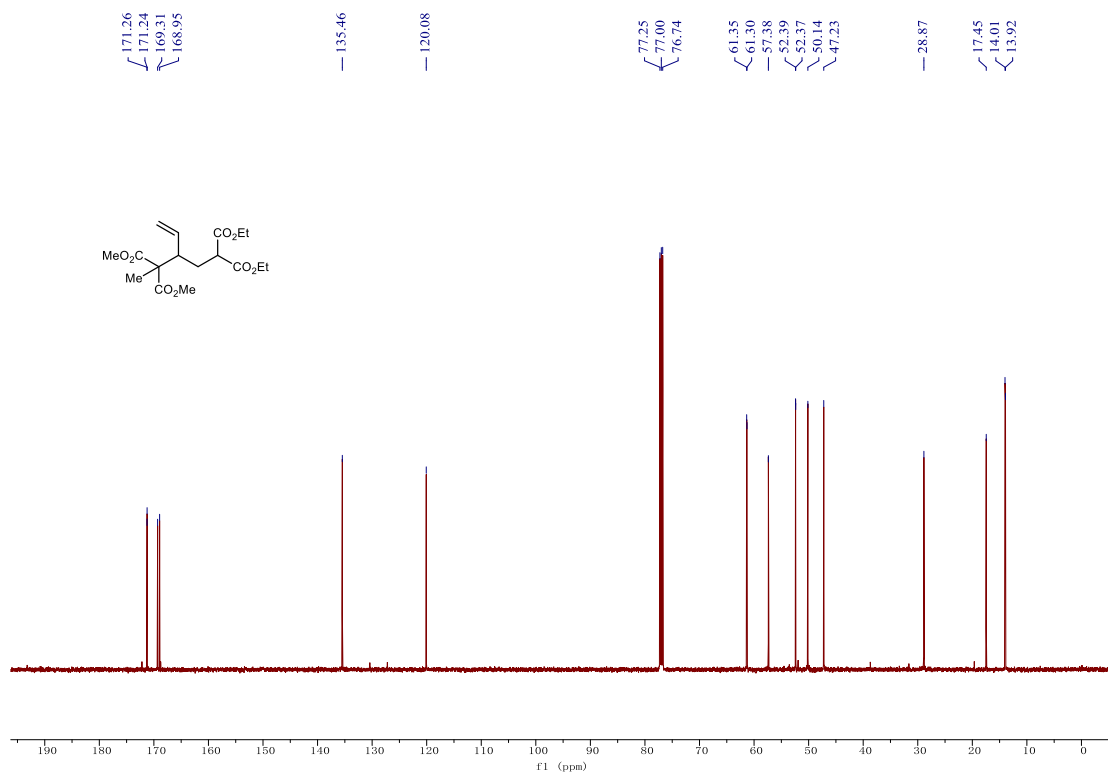

Fig. S37 <sup>13</sup>C NMR spectrum of *rac-5* in CDCl<sub>3</sub>

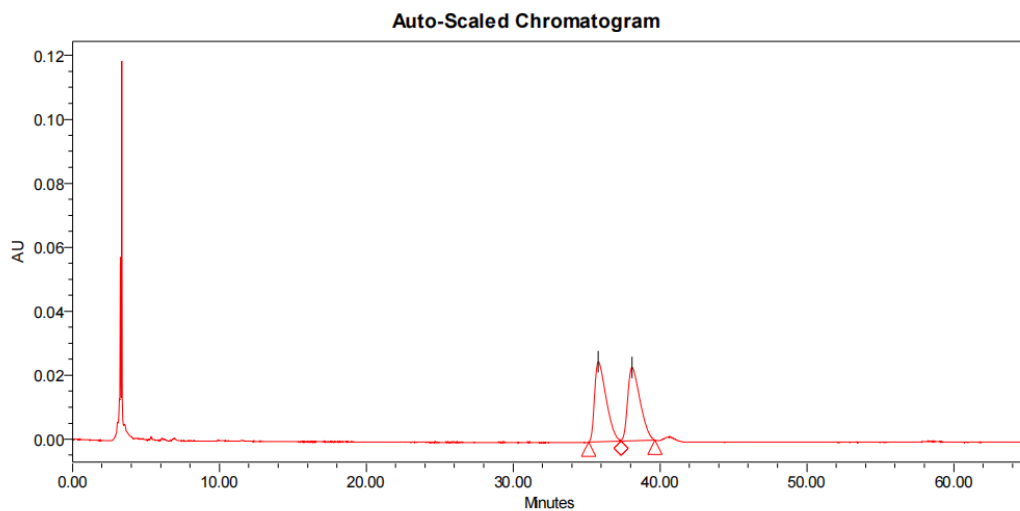

|   | RT     | Area    | % Area | Height |
|---|--------|---------|--------|--------|
| 1 | 35.794 | 1369264 | 50.54  | 25040  |
| 2 | 38.101 | 1339861 | 49.46  | 22916  |

**Fig. S38** HPLC spectrum of *rac*-**5**. Chiralpak IC, hexane/isopropanol = 97/3, 1 mL/min, 30 °C, 220 nm

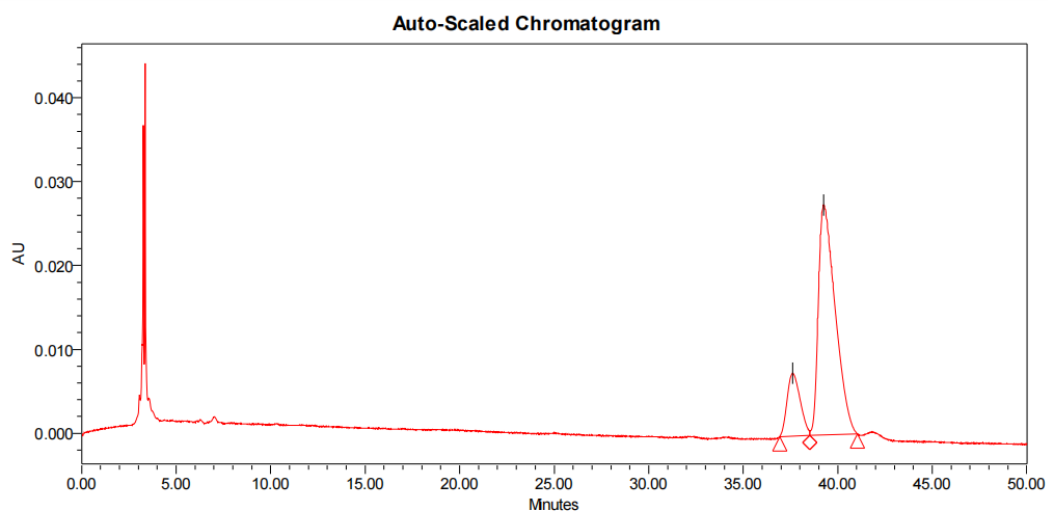

|   | RT     | Area    | % Area | Height |
|---|--------|---------|--------|--------|
| 1 | 37.607 | 358868  | 17.24  | 7526   |
| 2 | 39.251 | 1723166 | 82.76  | 27431  |

**Fig. S39** HPLC spectrum of **5**. Chiralpak IC, hexane/isopropanol = 97/3, 1 mL/min, 30 °C, 220 nm

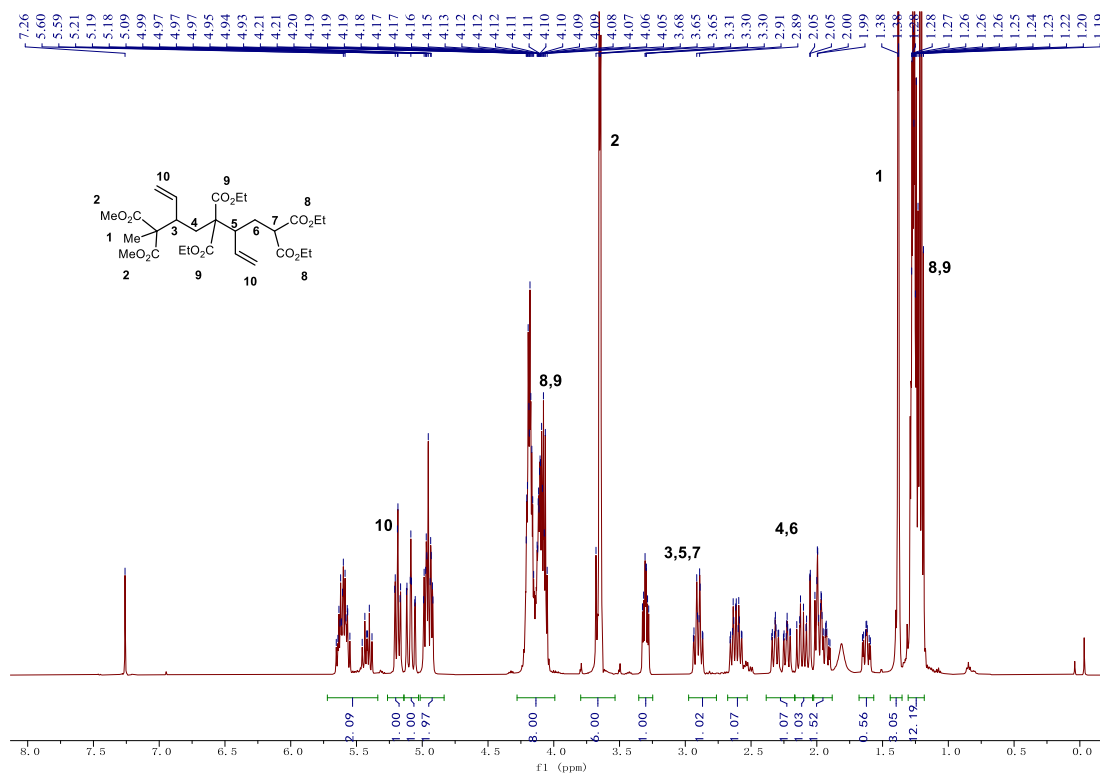

Fig. S40 <sup>1</sup>H NMR spectrum of *rac-6* in CDCl<sub>3</sub>

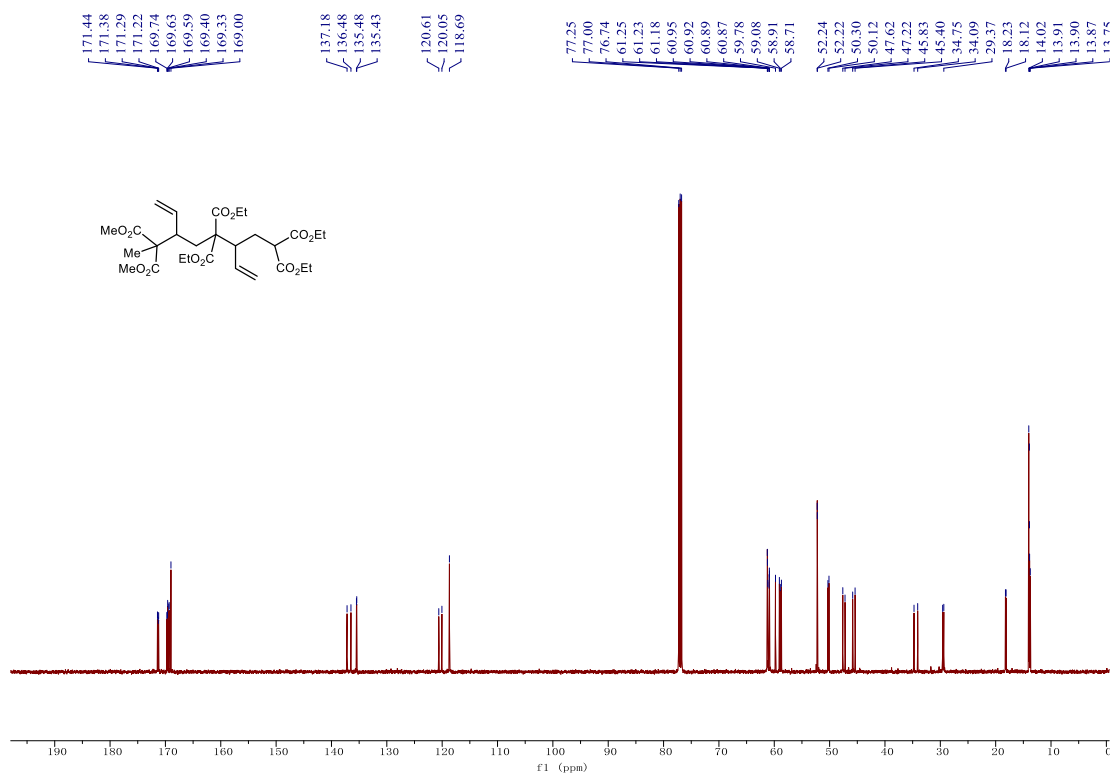

Fig. S41 <sup>13</sup>C NMR spectrum of *rac-6* in CDCl<sub>3</sub>

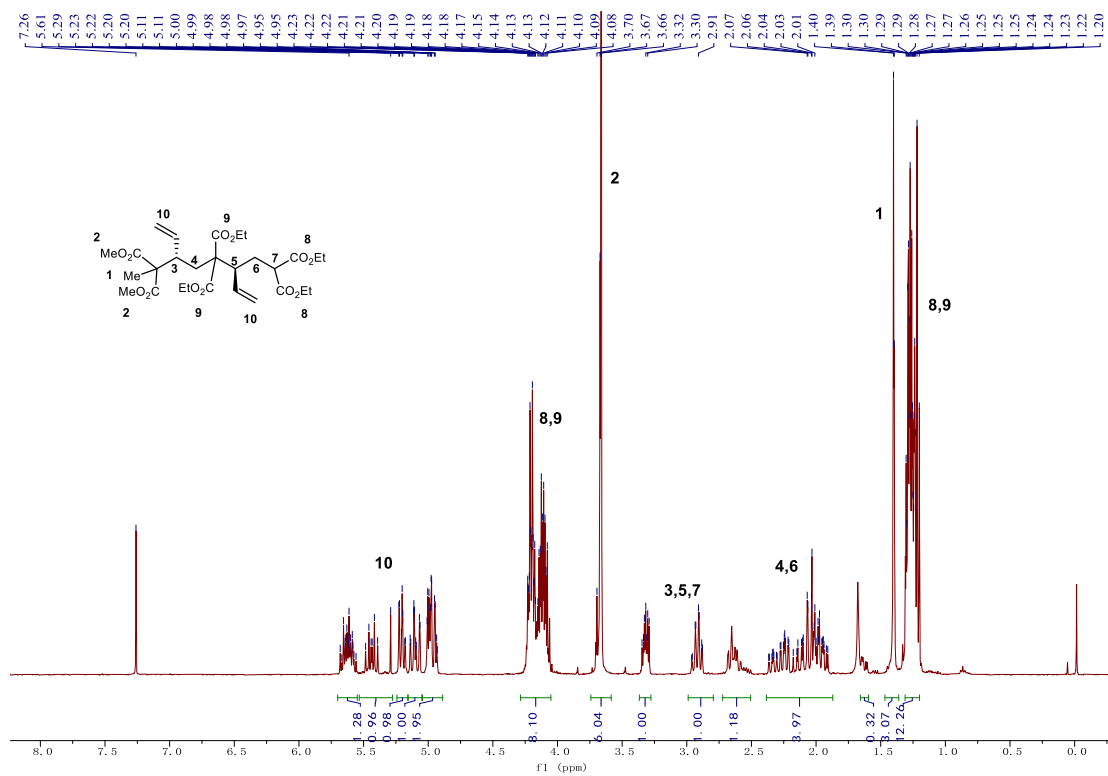

Fig. S42 <sup>1</sup>H NMR spectrum of 6 in CDCl<sub>3</sub>

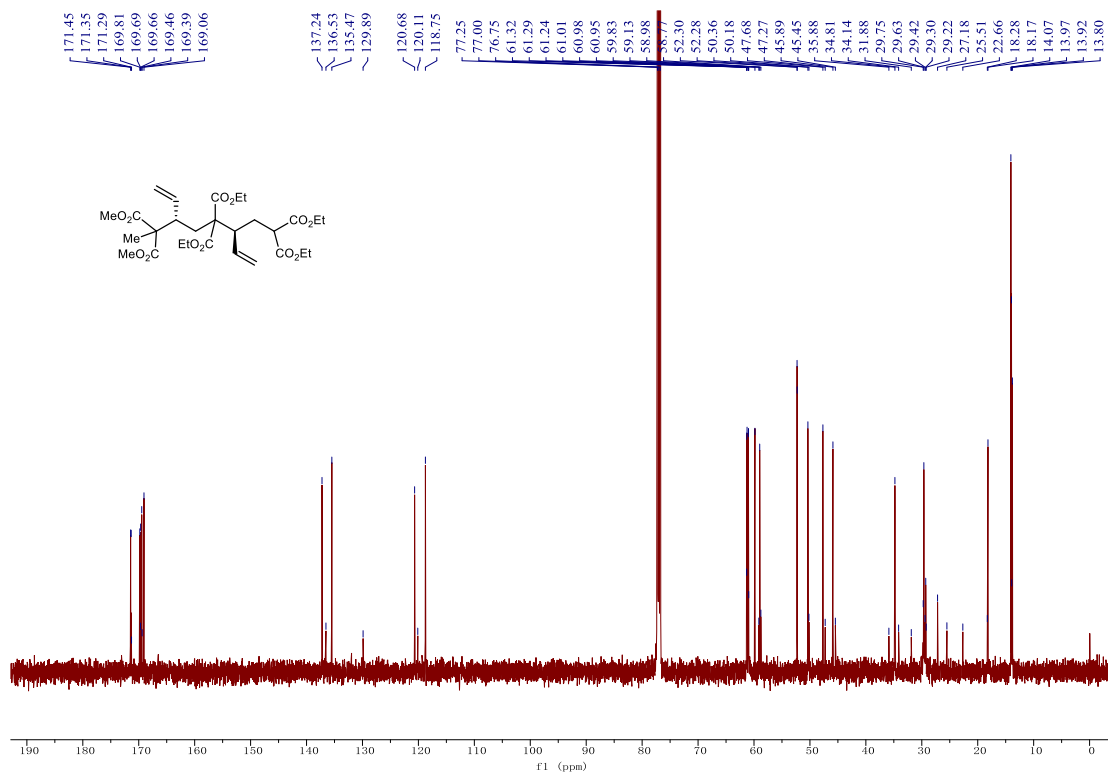

Fig. S43 <sup>13</sup>C NMR spectrum of 6 in CDCl<sub>3</sub>

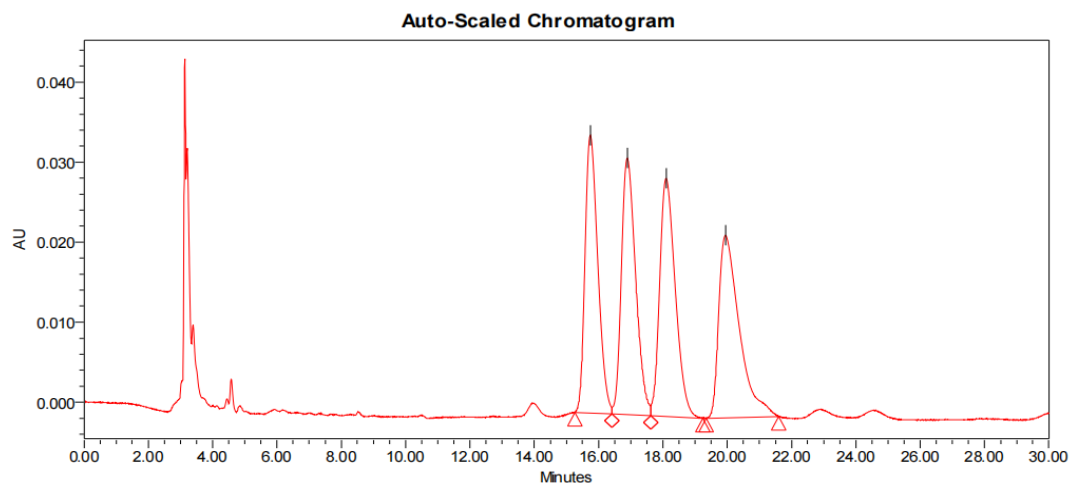

|   | RT     | Area    | % Area | Height |
|---|--------|---------|--------|--------|
| 1 | 15.747 | 954091  | 24.15  | 34727  |
| 2 | 16.895 | 987007  | 24.99  | 32089  |
| 3 | 18.109 | 1000403 | 25.33  | 29768  |
| 4 | 19.947 | 1008488 | 25.53  | 22814  |

**Fig. S44** HPLC spectrum of *rac*-6. Chiralpak IC, hexane/isopropanol = 90/10, 1 mL/min, 30 °C, 220 nm

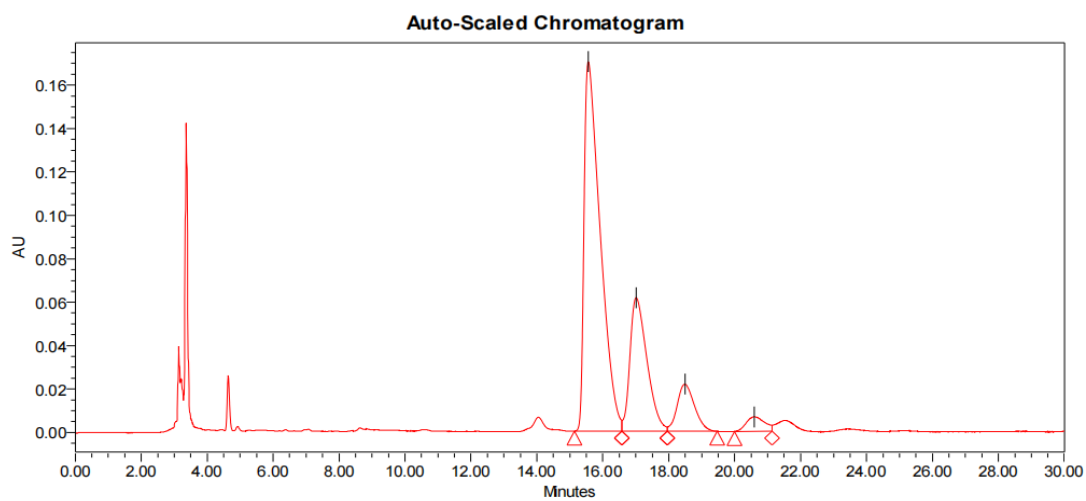

|   | RT     | Area    | % Area | Height |
|---|--------|---------|--------|--------|
| 1 | 15.558 | 5803542 | 63.94  | 170218 |
| 2 | 17.017 | 2213355 | 24.39  | 61480  |
| 3 | 18.500 | 795935  | 8.77   | 21697  |
| 4 | 20.588 | 263696  | 2.91   | 6714   |

**Fig. S45** HPLC spectrum of 6. Chiralpak IC, hexane/isopropanol = 90/10, 1 mL/min, 30 °C, 220 nm

## 5. Chain-Extension Experiment

**P[(S)-M1] macroinitiator:** an oven-dried 10 mL Schlenk tube equipped with a magnetic stir bar was transferred into a N<sub>2</sub>-filled glove box. To this tube, (S)-M1 (0.4 mmol), anhydrous MeCN (0.4 mL), MgBr<sub>2</sub> (0.02 mmol), DBU (0.02 mmol) and diethyl 2-allylmalonate (0.016 mmol) were sequentially added. The tube was taken out of the glove box and stirred at 50 °C for 24 h. The reaction mixture was slowly added into 20.0 mL of hexane while stirring at room temperature. The precipitated polymer was collected by vacuum filtration, washed with hexane and dried overnight under vacuum at 50 °C to a constant weight. 90 mg,  $M_{n, GPC} = 7.0$  kDa,  $\bar{D} = 1.19$ ,  $[\alpha]_D^{20} = +15.31$ .

**PM5 macroinitiator:** an oven-dried 25 mL Schlenk tube equipped with a magnetic stir bar was transferred into a N<sub>2</sub>-filled glove box. To this tube, La(OTf)<sub>3</sub> (0.2 mmol), DBU (0.2 mmol), diethyl 2-allylmalonate (0.16 mmol), anhydrous MeCN (4.0 mL) and M5 (4.0 mmol), were sequentially added. The tube was taken out of the glove box and stirred at 50 °C for 24 h. The reaction mixture was slowly added into 20.0 mL of hexane while stirring at room temperature. The precipitated polymer was collected by vacuum filtration, washed with hexane and dried overnight under vacuum at 50 °C to a constant weight.  $M_{n, GPC} = 5.4$  kDa,  $\bar{D} = 1.09$ .

**P[(S)-M1]-b-P[(R)-M1]:** an oven-dried 10 mL Schlenk tube equipped with a stirring bar was transferred into a N<sub>2</sub>-filled glove box. To this tube, P[(S)-M1] macroinitiator (0.002 mmol), (R)-M1 (0.2 mmol), dry MgBr<sub>2</sub> (0.02 mmol), DBU (0.02 mmol) and anhydrous MeCN (0.4 mL) were quickly added. The tube was taken out of the glove box and stirred at 50 °C. After 24 h, an aliquot was taken for <sup>1</sup>H NMR analysis to determine the monomer conversion (86%) and for GPC analysis to obtain polymer MW and its distribution ( $M_{n, GPC} = 15.7$  kDa,  $\bar{D} = 1.20$ ,  $[\alpha]_D^{20} = +1.29$ ). For further purification, the reaction mixture was slowly added into 10.0 mL of hexane while stirring at room temperature. The precipitated polymer was collected by vacuum filtration, washed with hexane and dried overnight under vacuum at 50 °C to a constant weight.

**P[(S)-M1]-b-PM5-b-P[(S)-M1]:** an oven-dried 10 mL Schlenk tube equipped with a stirring bar was transferred into a N<sub>2</sub>-filled glove box. To this tube, PM5 macroinitiator (0.008 mmol), (S)-M1 (0.2 mmol), dry MgBr<sub>2</sub> (0.02 mmol), DBU (0.02 mmol) and anhydrous MeCN (0.4 mL) were quickly added. The tube was taken out of the glove box and stirred at 50 °C. After 24 h, an aliquot was taken for <sup>1</sup>H NMR analysis to determine the monomer conversion (98%) and for GPC analysis to obtain polymer MW and its distribution ( $M_{n, GPC} = 12.3$  kDa,  $\bar{D} = 1.05$ ,  $[\alpha]_D^{20} = +10.54$ ). For further purification, the reaction mixture was slowly added into 10.0 mL of hexane while stirring at room temperature. The precipitated polymer was collected by vacuum filtration, washed with hexane and dried overnight under vacuum at 50 °C to a constant weight.

**P[(R)-M1]-b-P[(S)-M1]-b-PM5-b-P[(S)-M1]-b-P[(R)-M1]:** an oven-dried 10 mL Schlenk tube equipped with a stirring bar was transferred into a N<sub>2</sub>-filled glove box. To this tube, P[(S)-M1]-b-PM5-b-P[(S)-M1] macroinitiator (0.008 mmol), (R)-M1 (0.2 mmol), dry MgBr<sub>2</sub> (0.02 mmol), DBU (0.02 mmol) and anhydrous MeCN (0.4 mL) were quickly added. The tube was taken out of the glove box and stirred at 50 °C. After 24 h, an aliquot was taken for <sup>1</sup>H NMR analysis to determine the monomer conversion (98%) and for GPC analysis to obtain polymer MW and its distribution ( $M_{n, GPC} = 18.2$  kDa,  $\bar{D} = 1.07$ ,  $[\alpha]_D^{20} = +1.61$ ). For further purification, the reaction mixture was slowly added into 10.0 mL of hexane while stirring at room temperature. The precipitated polymer was collected by vacuum filtration, washed with hexane and dried overnight under vacuum at 50 °C to a constant weight.

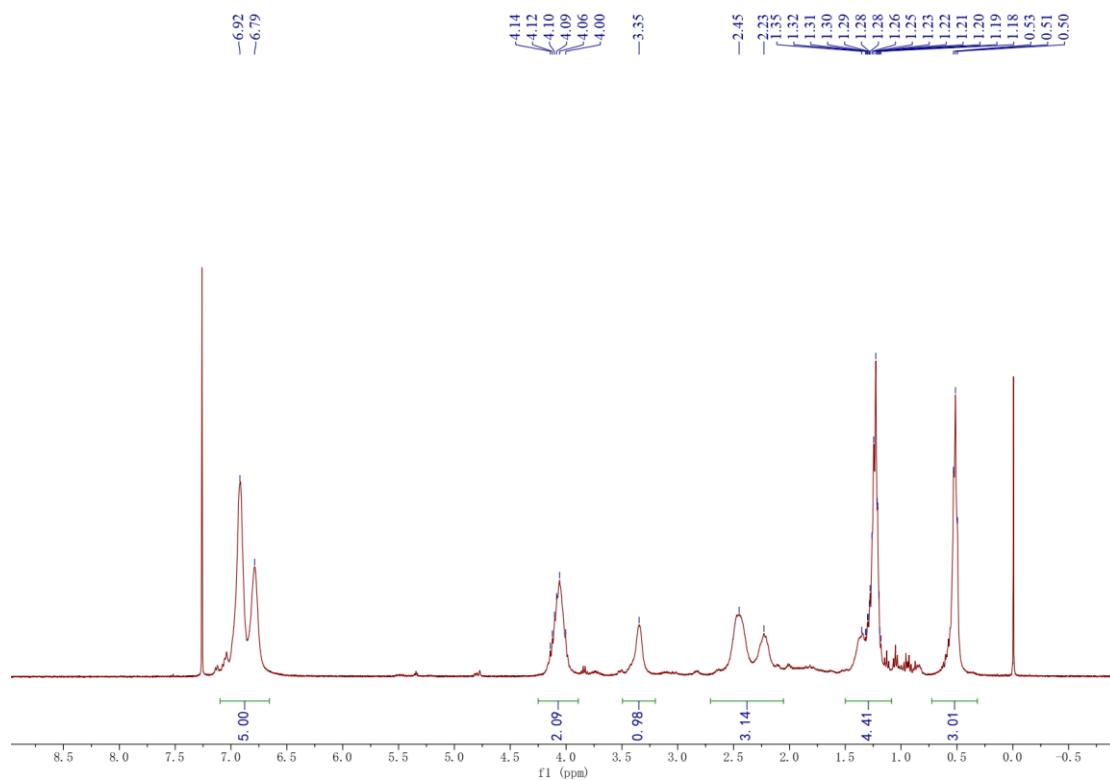

**Fig. S46**  $^1\text{H}$  NMR spectrum of P[(*S*)-M1]-b-P[(*R*)-M1] in  $\text{CDCl}_3$

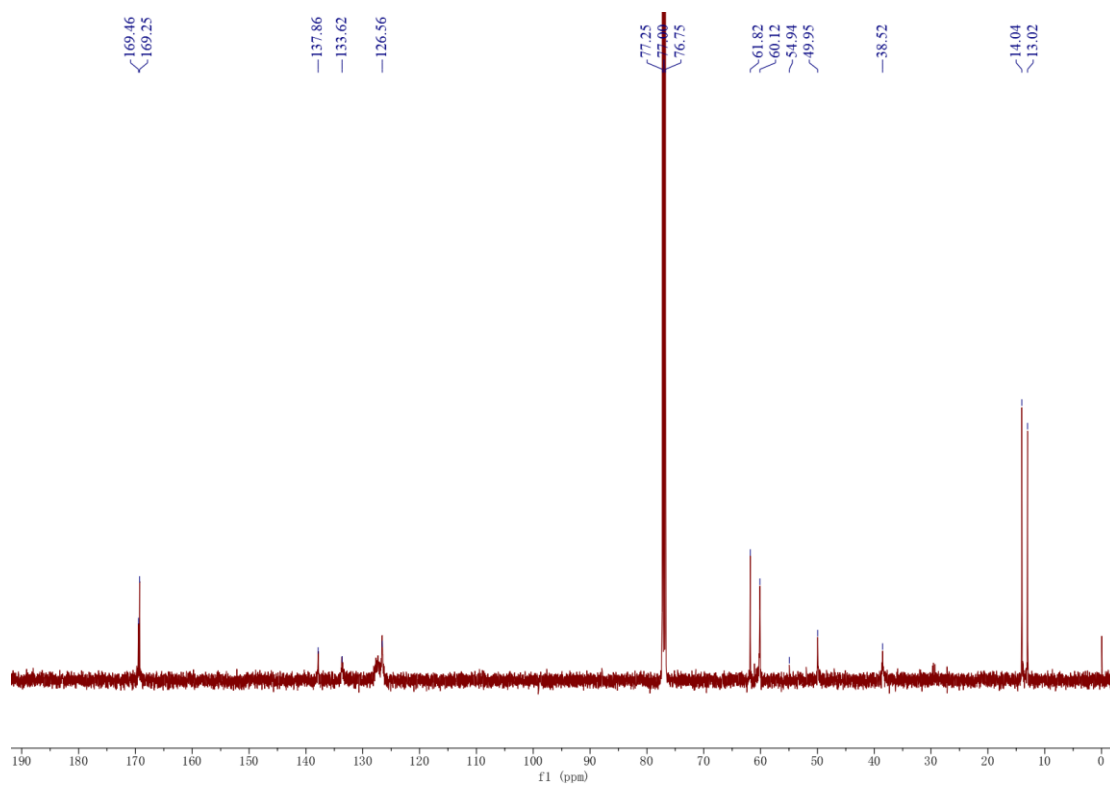

**Fig. S47**  $^{13}\text{C}$  NMR spectrum of P[(*S*)-M1]-b-P[(*R*)-M1] in  $\text{CDCl}_3$

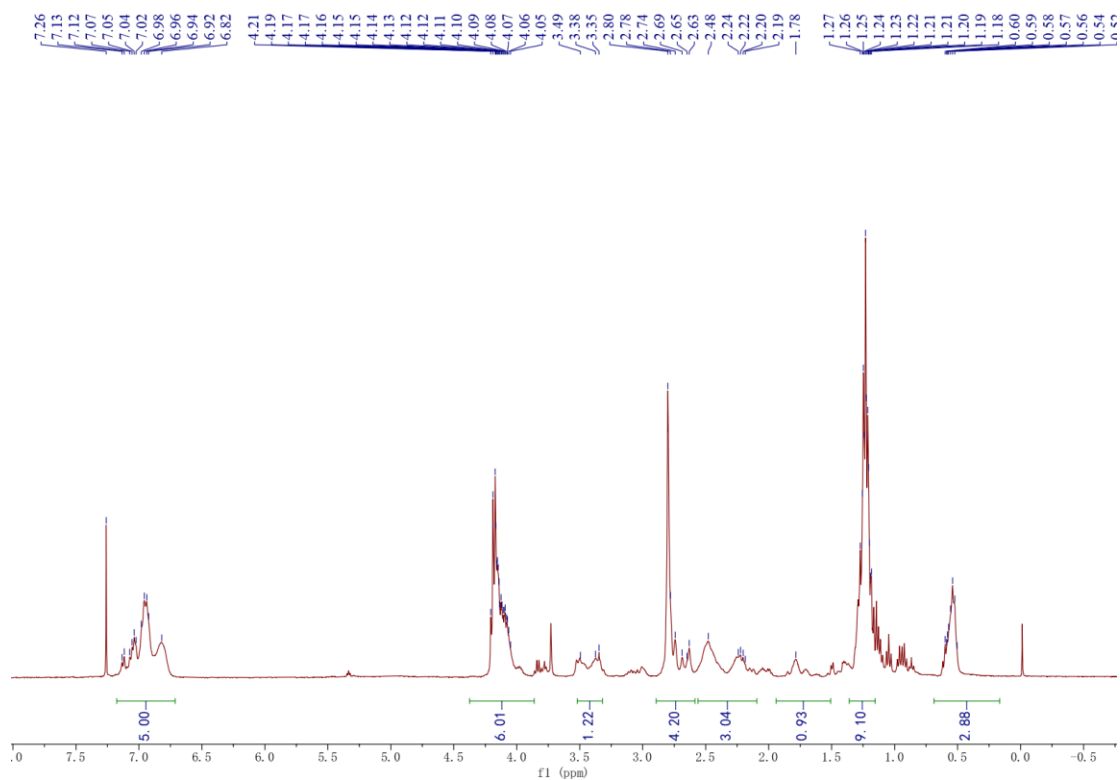

**Fig. S48**  $^1\text{H}$  NMR spectrum of  $\text{P}[(S)\text{-M1}]\text{-b-PM5-b-P}[(S)\text{-M1}]$  in  $\text{CDCl}_3$

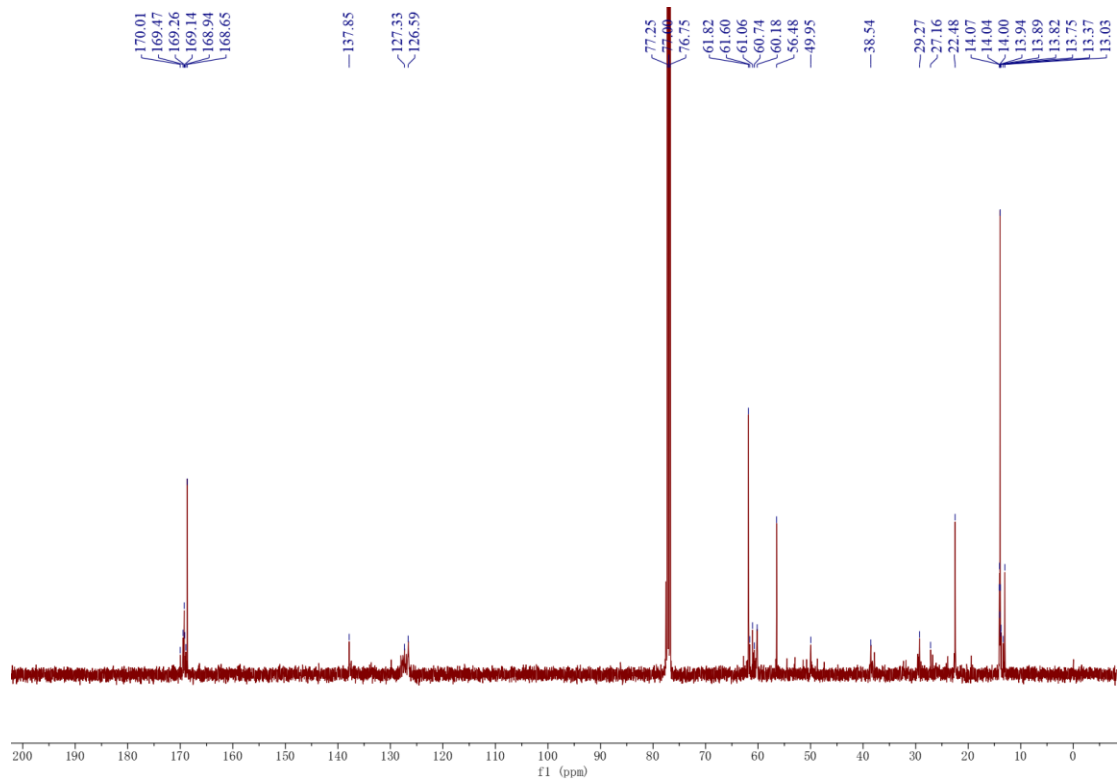

**Fig. S49**  $^{13}\text{C}$  NMR spectrum of  $\text{P}[(S)\text{-M1}]\text{-b-PM5-b-P}[(S)\text{-M1}]$  in  $\text{CDCl}_3$

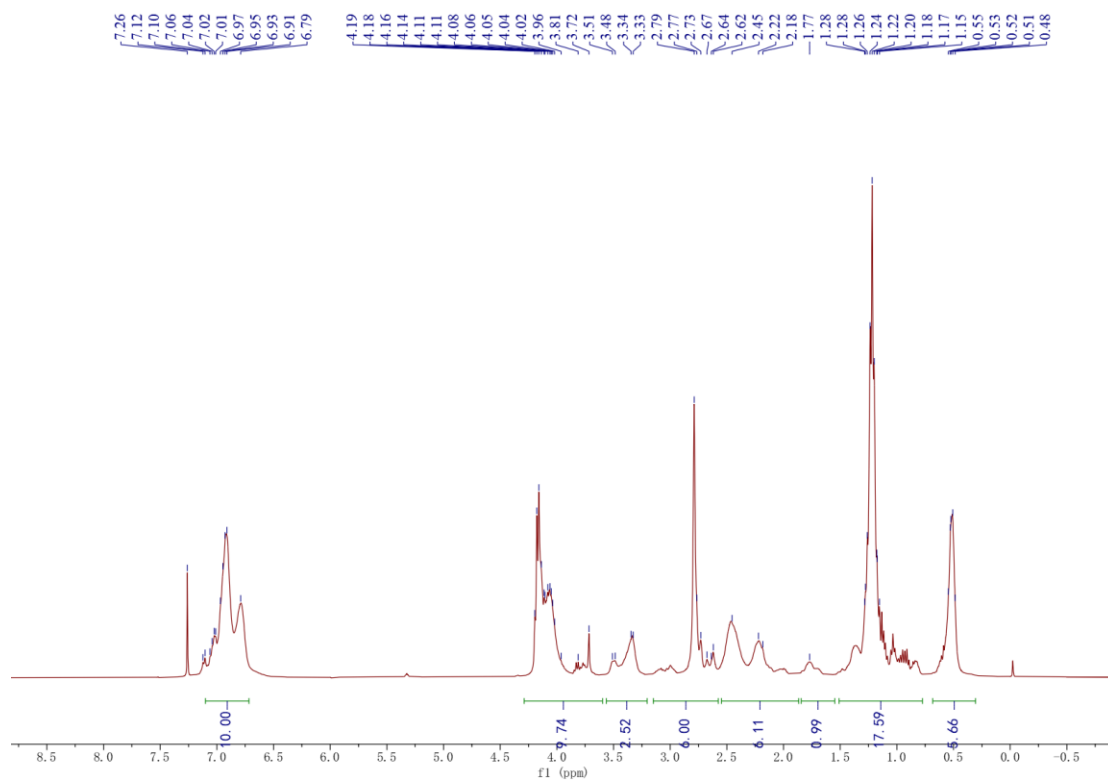

**Fig. S50**  $^1\text{H}$  NMR spectrum of P[(*R*)-M1]-b-P[(*S*)-M1]-b-PM5-b-P[(*S*)-M1]-b-P[(*R*)-M1] in  $\text{CDCl}_3$

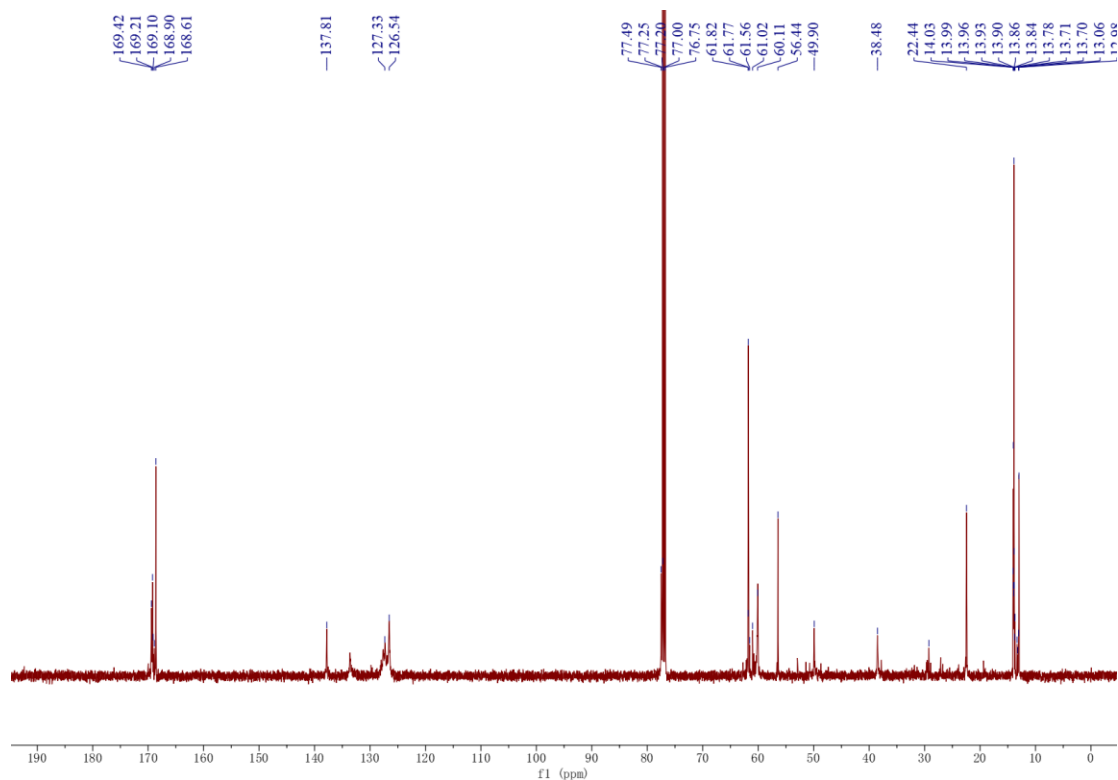

**Fig. S51**  $^{13}\text{C}$  NMR spectrum of P[(*R*)-M1]-b-P[(*S*)-M1]-b-PM5-b-P[(*S*)-M1]-b-P[(*R*)-M1] in  $\text{CDCl}_3$

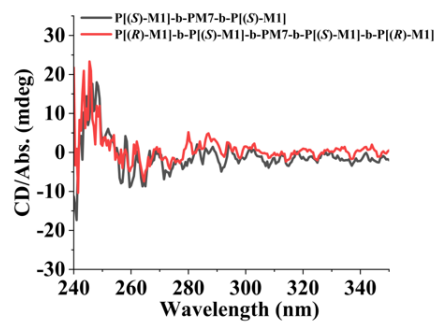

**Fig. S52** CD spectra of P[(S)-M1]-b-PM5-b-P[(S)-M1] and P[(R)-M1]-b-P[(S)-M1]-b-PM5-b-P[(S)-M1]-b-P[(R)-M1] in CHCl<sub>3</sub> at  $1 \times 10^{-5}$  M.

## 6. Thermal Analysis

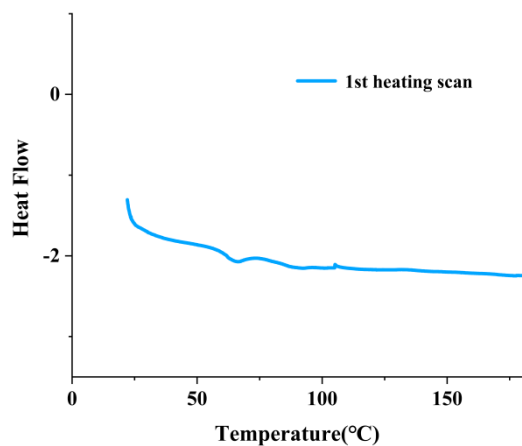

Fig. S53 DSC curves of **PM1** (12.2 kDa,  $D = 1.05$ ).  $T_g = 66$  °C (1<sup>st</sup> heating scan).

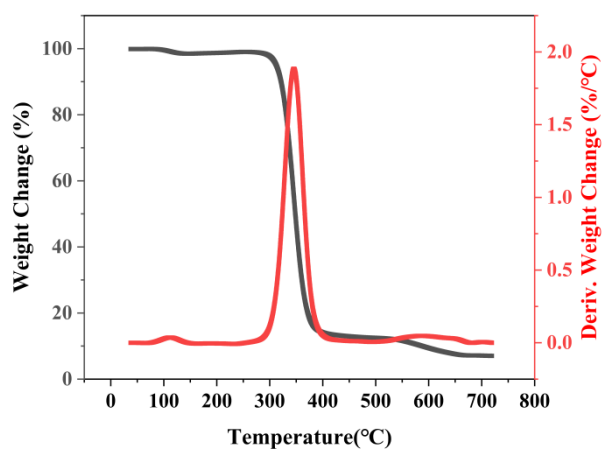

Fig. S54 TGA and DTG curves of **PM1** (12.2 kDa,  $D = 1.05$ ).  $T_d^{5\%} = 311$  °C,  $T_{max} = 336$  °C.

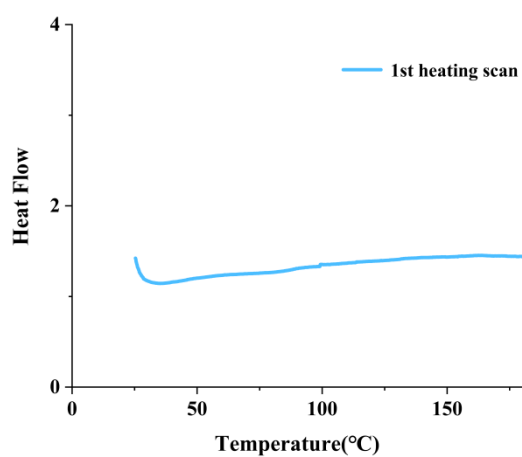

Fig. S55 DSC curves of **P[(S)-M1]** (13.9 kDa,  $D = 1.36$ ). (1<sup>st</sup> heating scan).

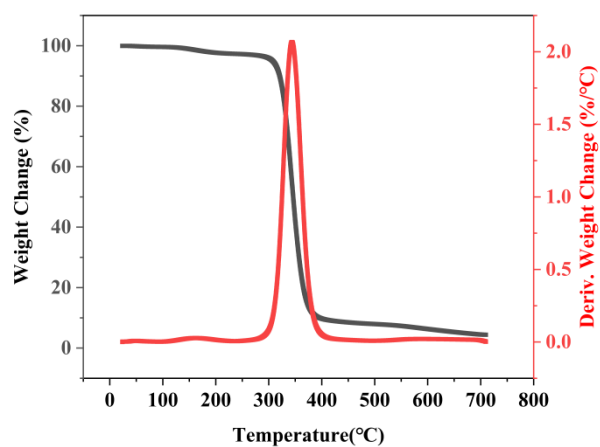

Fig. S56 TGA and DTG curves of P[(S)-M1] (13.9 kDa,  $\bar{D} = 1.36$ ).  $T_d^{5\%} = 307$  °C,  $T_{max} = 344$  °C.

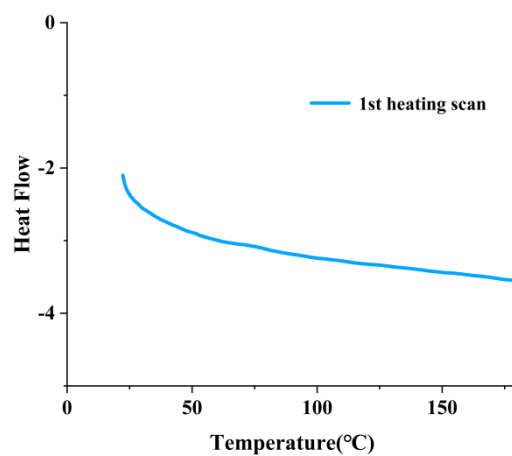

Fig. S57 DSC curves of P[(R)-M1] (14.2 kDa,  $\bar{D} = 1.30$ ). (1<sup>st</sup> heating scan).

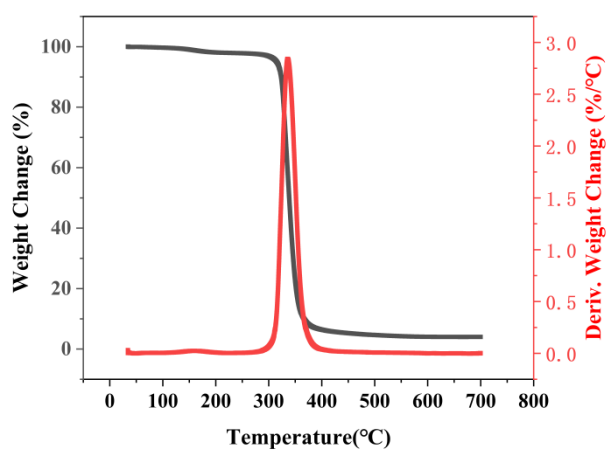

Fig. S58 TGA and DTG curves of P[(R)-M1] (14.2 kDa,  $\bar{D} = 1.30$ ).  $T_d^{5\%} = 314$  °C,  $T_{max} = 337$  °C.

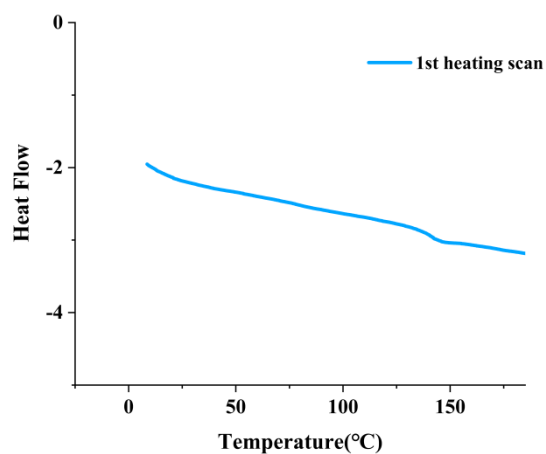

Fig. S59 DSC curves of PM2 (9.6 kDa,  $D = 1.07$ ).  $T_g = 140$  °C (2<sup>nd</sup> heating scan)

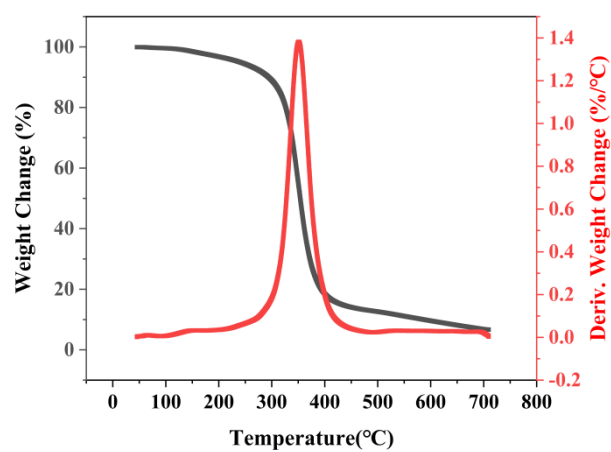

Fig. S60 TGA and DTG curves of PM2 (9.6 kDa,  $D = 1.07$ ).  $T_d^{5\%} = 240$  °C,  $T_{max} = 351$  °C.

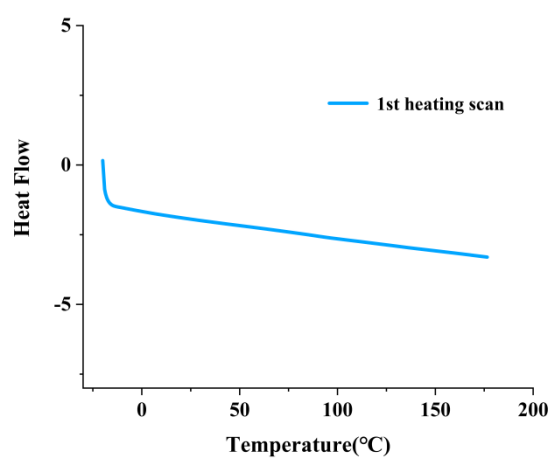

Fig. S61 DSC curves of P[(S)-M2] (1<sup>st</sup> heating scan).

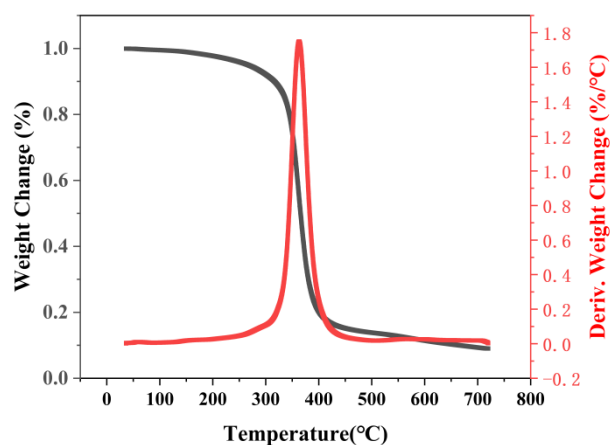

Fig. S62 TGA and DTG curves of P[(S)-M2].  $T_d^{5\%} = 251\text{ }^\circ\text{C}$ ,  $T_{max} = 362\text{ }^\circ\text{C}$ .

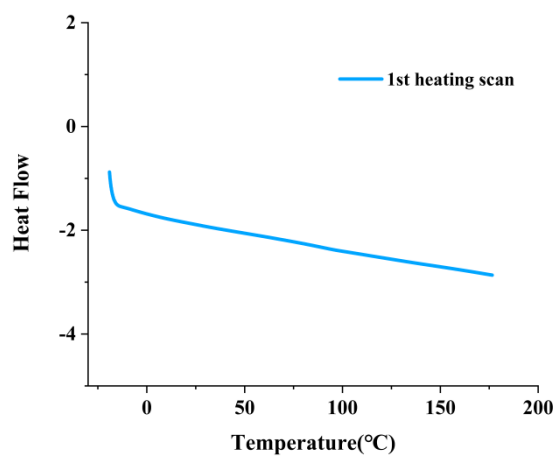

Fig. S63 DSC curves of P[(R)-M2] (1<sup>st</sup> heating scan).

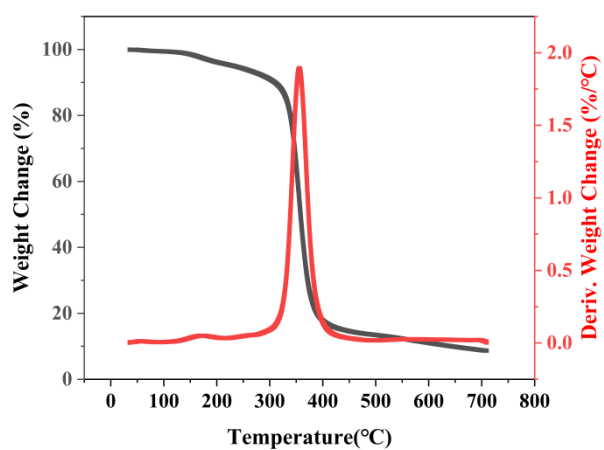

Fig. S64 TGA and DTG curves of P[(R)-M2].  $T_d^{5\%} = 232\text{ }^\circ\text{C}$ ,  $T_{max} = 355\text{ }^\circ\text{C}$ .

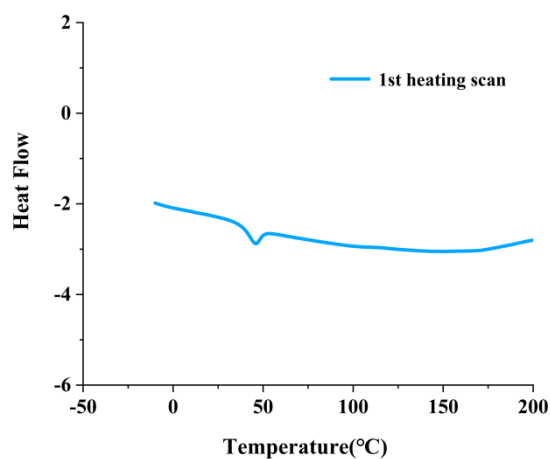

Fig. S65 DSC curves of **PM3** (11.5 kDa,  $\bar{D} = 1.07$ ).  $T_g = 35$  °C (1<sup>st</sup> heating scan)

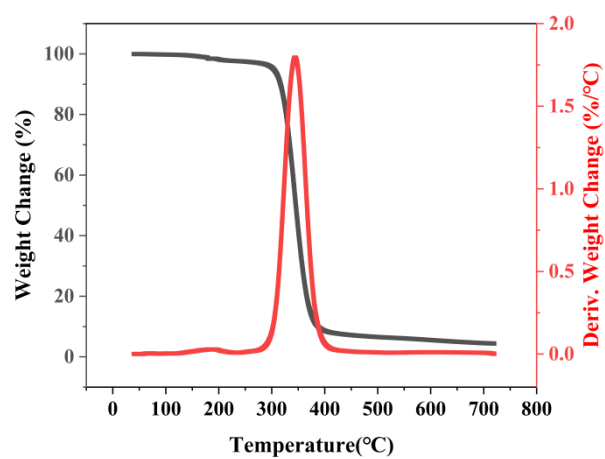

Fig. S66 TGA and DTG curves of **PM3** (11.5 kDa,  $\bar{D} = 1.07$ ).  $T_d^{5\%} = 293$  °C,  $T_{max} = 337$  °C.

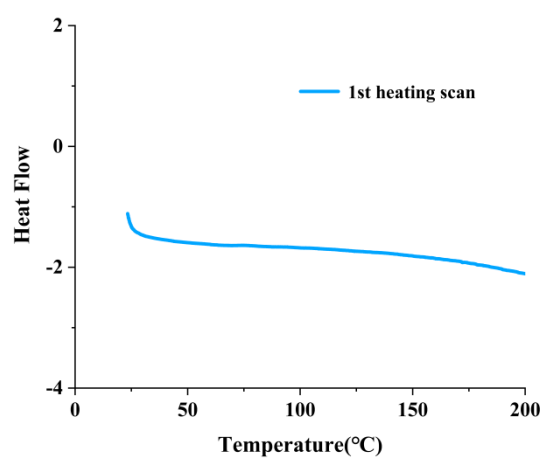

Fig. S67 DSC curves of **P[(S)-M3]** (15.0 kDa,  $\bar{D} = 1.35$ ) (1<sup>st</sup> heating scan).

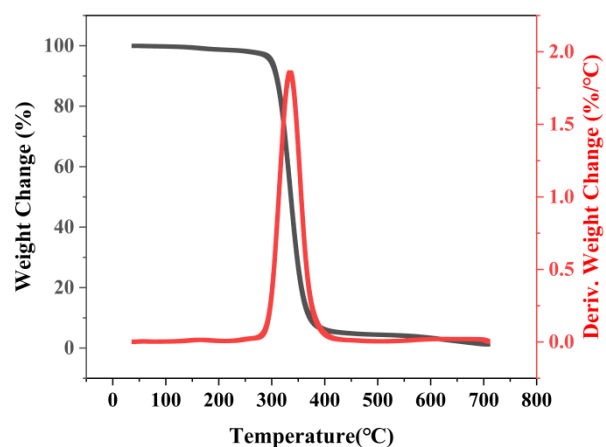

**Fig. S68** TGA and DTG curves of **P[(S)-M3]** (15.0 kDa,  $\bar{D} = 1.35$ ).  $T_d^{5\%} = 297$  °C,  $T_{max} = 334$  °C.

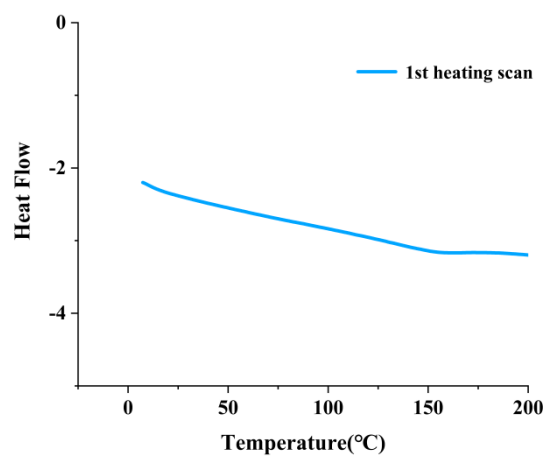

**Fig. S69** DSC curves of **P[(R)-M3]** (16.0 kDa,  $\bar{D} = 1.37$ ) (1<sup>st</sup> heating scan).

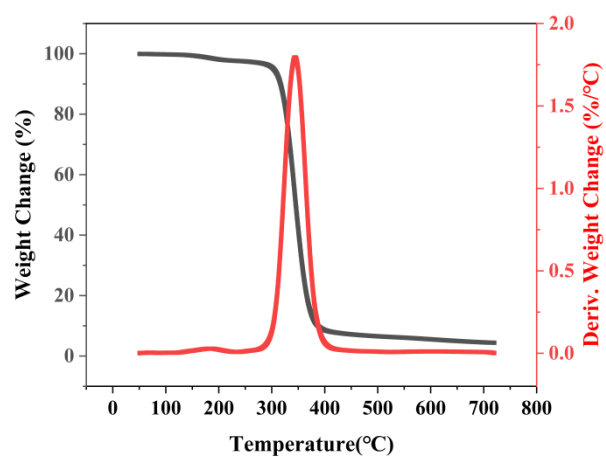

**Fig. S70** TGA and DTG curves of **P[(R)-M3]** (16.0 kDa,  $\bar{D} = 1.37$ ).  $T_d^{5\%} = 299$  °C,  $T_{max} = 343$  °C.

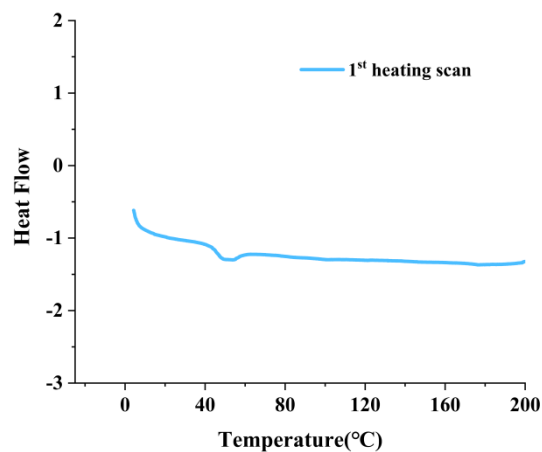

**Fig. S71** DSC curves of **PM4** (12.1 kDa,  $\bar{D} = 1.07$ ).  $T_g = 45$  °C (1<sup>st</sup> heating scan)

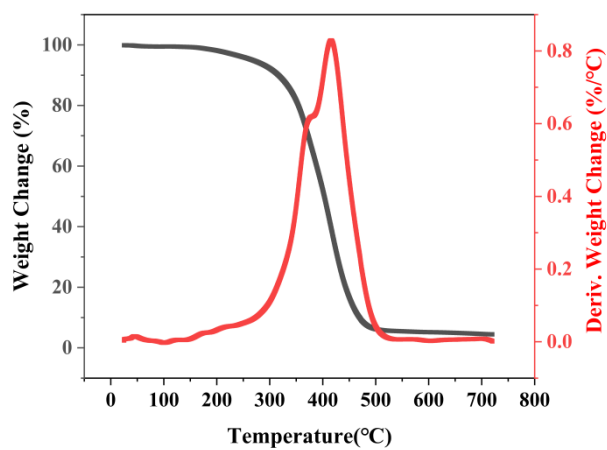

**Fig. S72** TGA and DTG curves of **PM4** (12.1 kDa,  $\bar{D} = 1.07$ ).  $T_d^{5\%} = 267$  °C,  $T_{max} = 418$  °C.

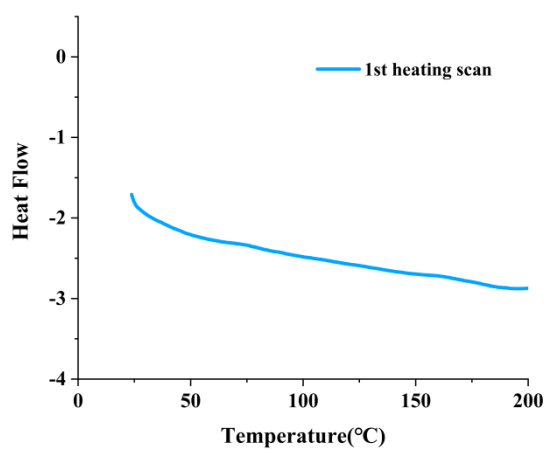

**Fig. S73** DSC curves of **P[(S)-M4]** (14.8 kDa,  $\bar{D} = 1.19$ ). (1<sup>st</sup> heating scan)

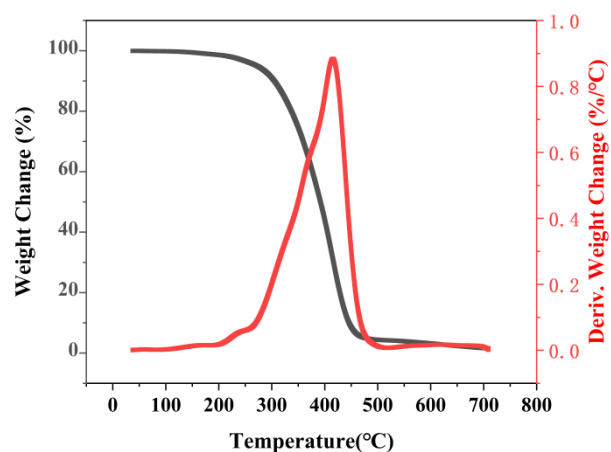

Fig. S74 TGA and DTG curves of P[(S)-M4] (14.8 kDa,  $D = 1.19$ ).  $T_d^{5\%} = 271$  °C,  $T_{max} = 414$  °C.

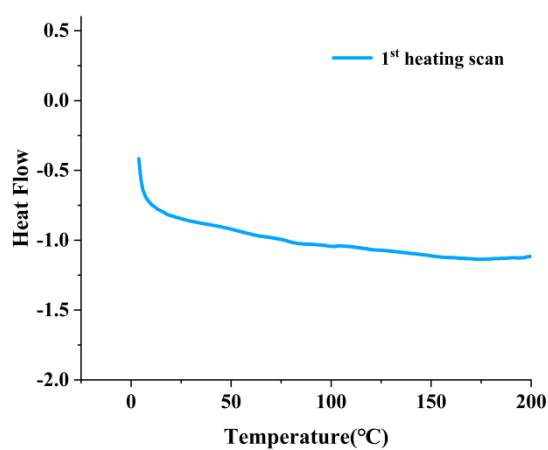

Fig. S75 DSC curves of P[(R)-M4] (15.0 kDa,  $D = 1.19$ ). (1<sup>st</sup> heating scan)

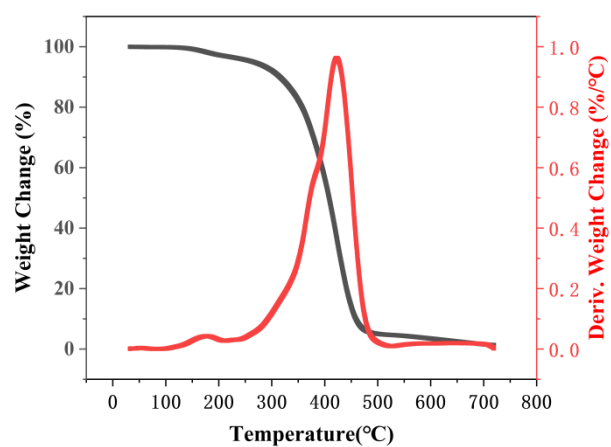

Fig. S76 TGA and DTG curves of P[(R)-M4] (15.0 kDa,  $D = 1.19$ ).  $T_d^{5\%} = 264$  °C,  $T_{max} = 424$  °C.

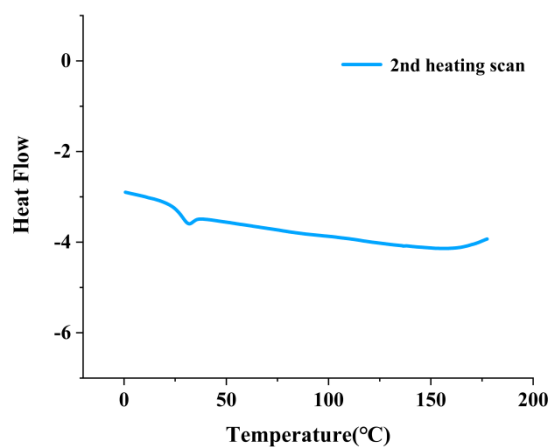

Fig. S77 DSC curves of **PM6** (9.4 kDa,  $D = 1.15$ ).  $T_g = 22$  °C (2<sup>nd</sup> heating scan)

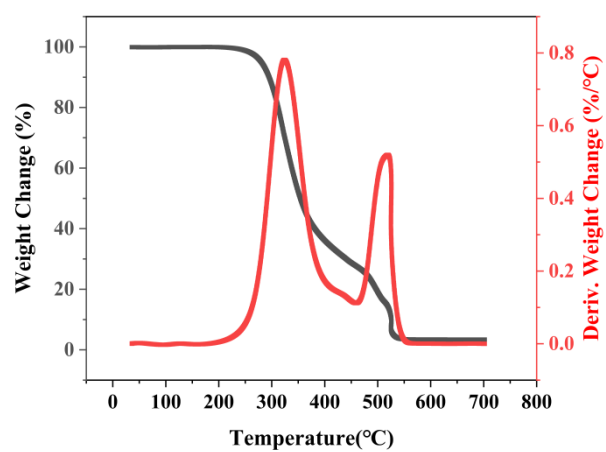

Fig. S78 TGA and DTG curves of **PM6** (9.4 kDa,  $D = 1.15$ ).  $T_d^{5\%} = 280$  °C,  $T_{max} = 323$  °C.

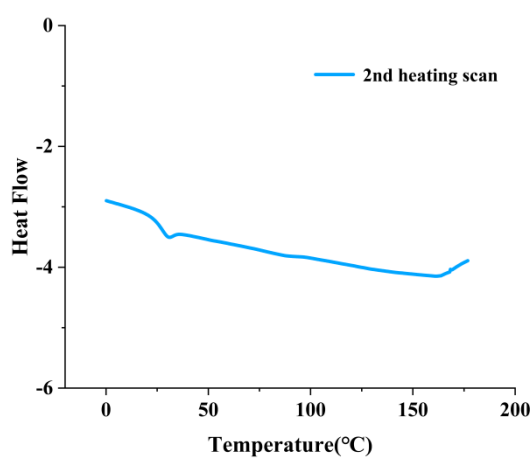

Fig. S79 DSC curves of **P[(S)-M6]** (10.8 kDa,  $D = 1.16$ ).  $T_g = 22$  °C (2<sup>nd</sup> heating scan)

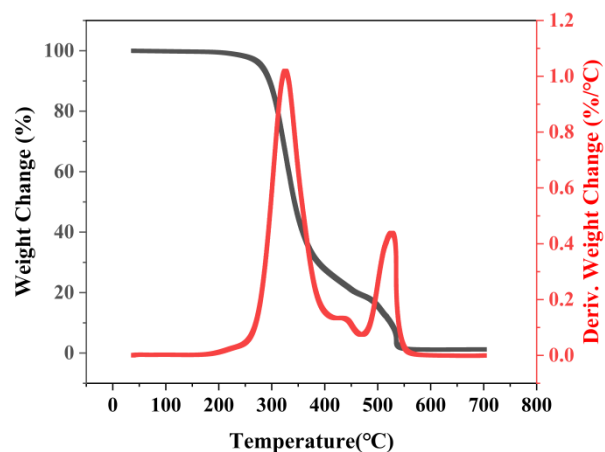

**Fig. S80** TGA and DTG curves of **P[(S)-M6]** (10.8 kDa,  $D = 1.16$ ).  $T_d^{5\%} = 282$  °C,  $T_{max} = 325$  °C.

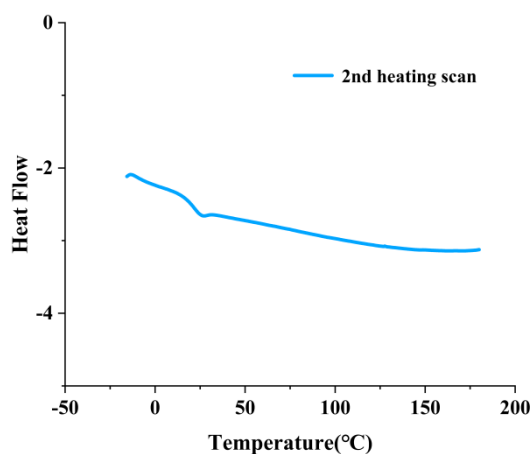

**Fig. S81** DSC curves of **P[(R)-M6]** (11.3 kDa,  $D = 1.14$ ).  $T_g = 22$  °C (2<sup>nd</sup> heating scan)

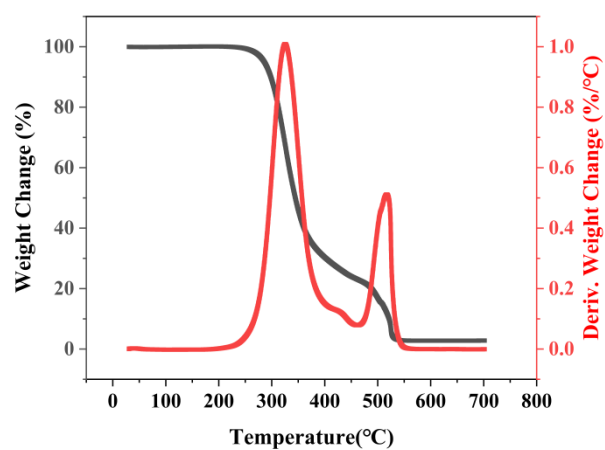

**Fig. S82** TGA and DTG curves of **P[(R)-M6]** (11.3 kDa,  $D = 1.14$ ).  $T_d^{5\%} = 281$  °C,  $T_{max} = 323$  °C.

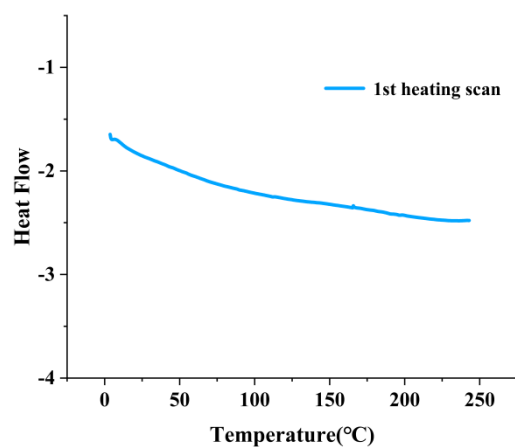

**Fig. S83** DSC curves of  $\text{P}[(S)\text{-M1}]\text{-}b\text{-P}[(R)\text{-M1}]$  (15.7 kDa,  $D = 1.20$ ). (1<sup>st</sup> heating scan)

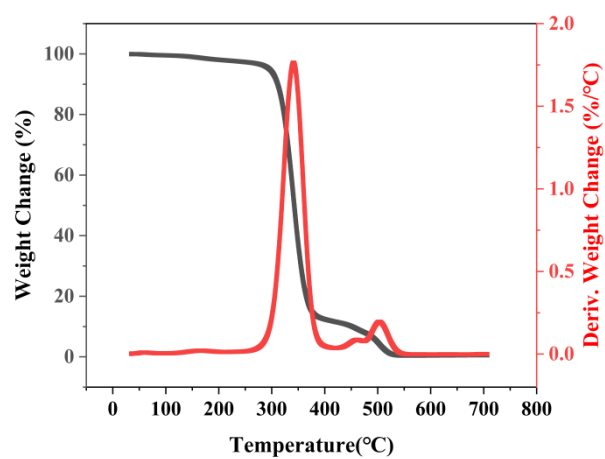

**Fig. S84** TGA and DTG curves of  $\text{P}[(S)\text{-M1}]\text{-}b\text{-P}[(R)\text{-M1}]$  (15.7 kDa,  $D = 1.20$ ).  $T_d^{5\%} = 295$  °C,  $T_{max} = 341$  °C.

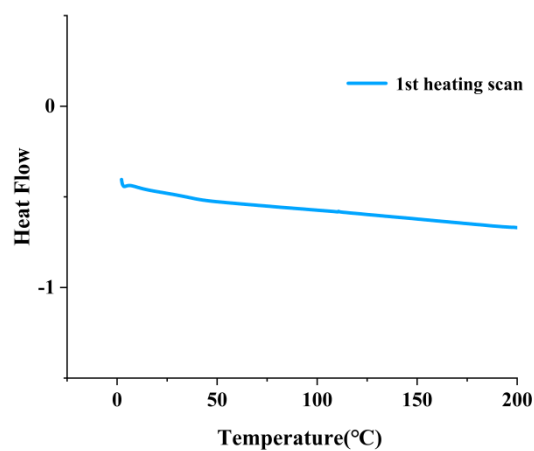

**Fig. S85** DSC curves of  $\text{P}[(S)\text{-M1}]\text{-}b\text{-PM5}\text{-}b\text{-P}[(S)\text{-M1}]$  (12.3 kDa,  $D = 1.05$ ). (1<sup>st</sup> heating scan)

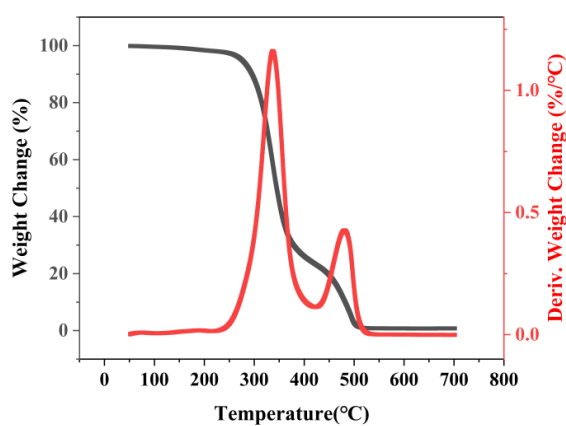

**Fig. S86** TGA and DTG curves of  $\text{P}[(S)\text{-M1}]\text{-}b\text{-PM5}\text{-}b\text{-P}[(S)\text{-M1}]$  (12.3 kDa,  $\mathcal{D} = 1.05$ ).  $T_d^{5\%} = 274\text{ }^\circ\text{C}$ ,  $T_{max} = 336\text{ }^\circ\text{C}$ .

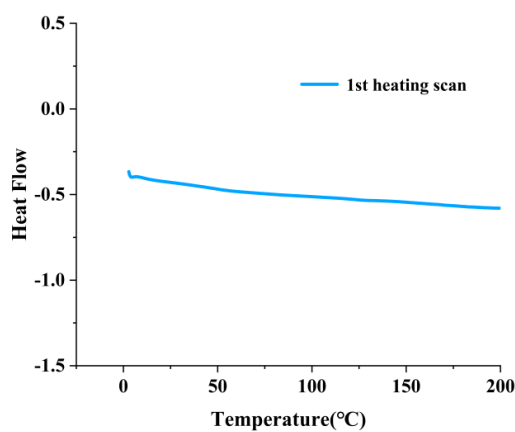

**Fig. S87** DSC curves of  $\text{P}[(R)\text{-M1}]\text{-}b\text{-P}[(S)\text{-M1}]\text{-}b\text{-PM5}\text{-}b\text{-P}[(S)\text{-M1}]\text{-}b\text{-P}[(R)\text{-M1}]$  (18.2 kDa,  $\mathcal{D} = 1.07$ ). (1<sup>st</sup> heating scan)

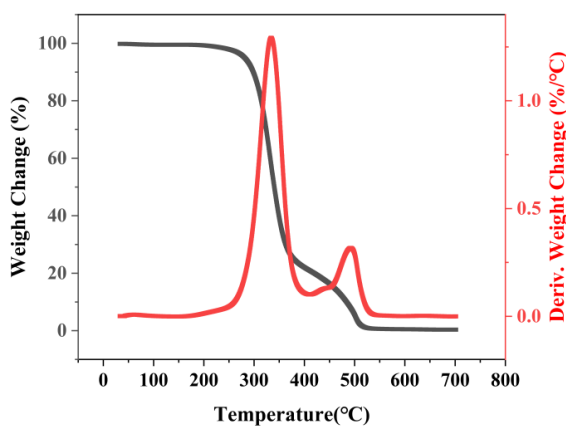

**Fig. S88** TGA and DTG curves of  $\text{P}[(R)\text{-M1}]\text{-}b\text{-P}[(S)\text{-M1}]\text{-}b\text{-PM5}\text{-}b\text{-P}[(S)\text{-M1}]\text{-}b\text{-P}[(R)\text{-M1}]$  (18.2 kDa,  $\mathcal{D} = 1.07$ ).  $T_d^{5\%} = 280\text{ }^\circ\text{C}$ ,  $T_{max} = 333\text{ }^\circ\text{C}$ .

## 7. NMR Spectra of Homopolymers

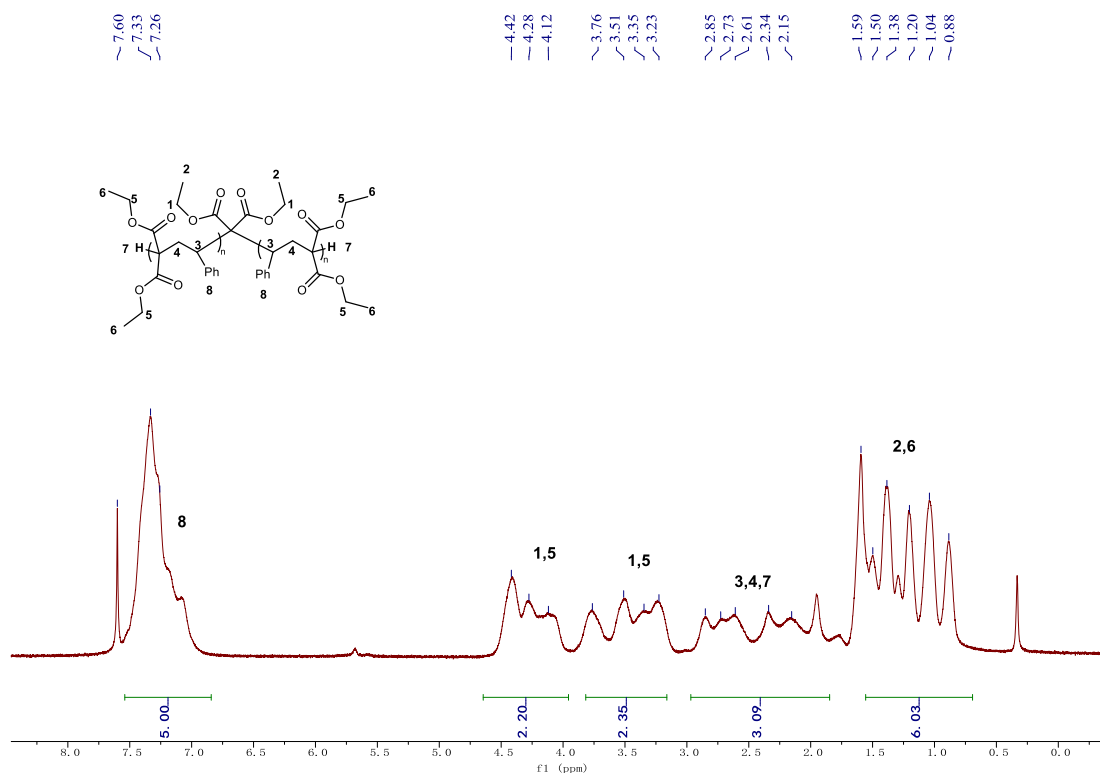

Fig. S89 <sup>1</sup>H NMR spectrum of PM1 in CDCl<sub>3</sub>

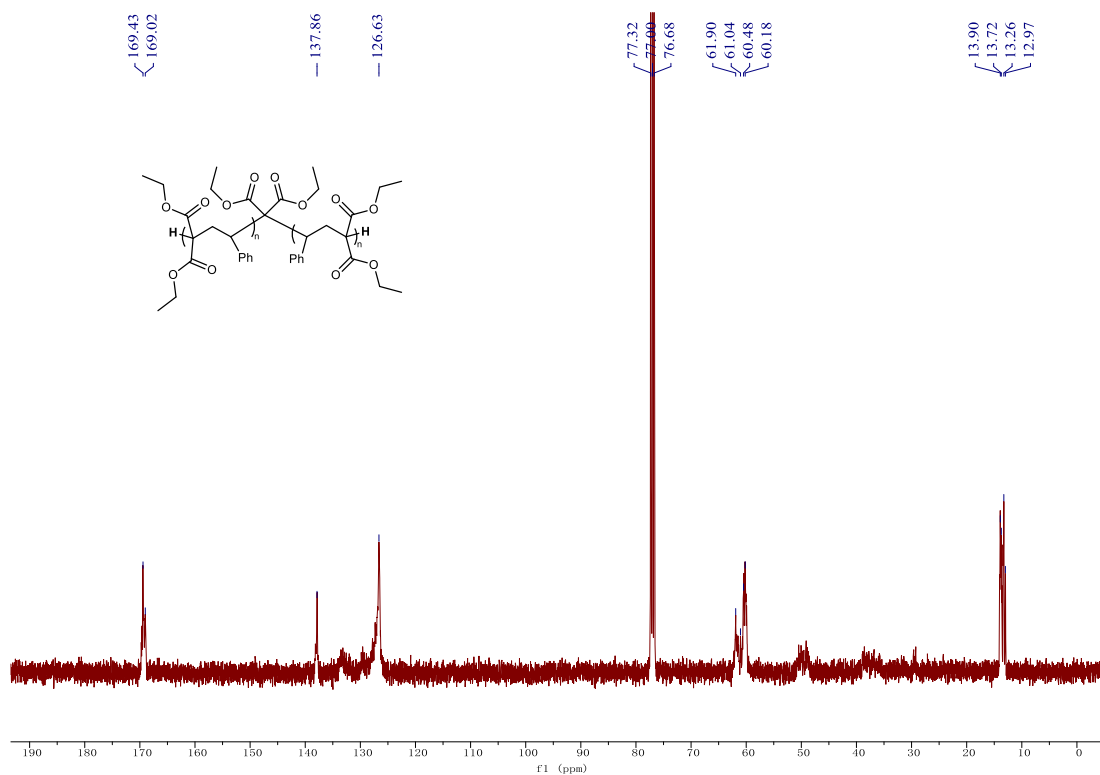

Fig. S90 <sup>13</sup>C NMR spectrum of PM1 in CDCl<sub>3</sub>

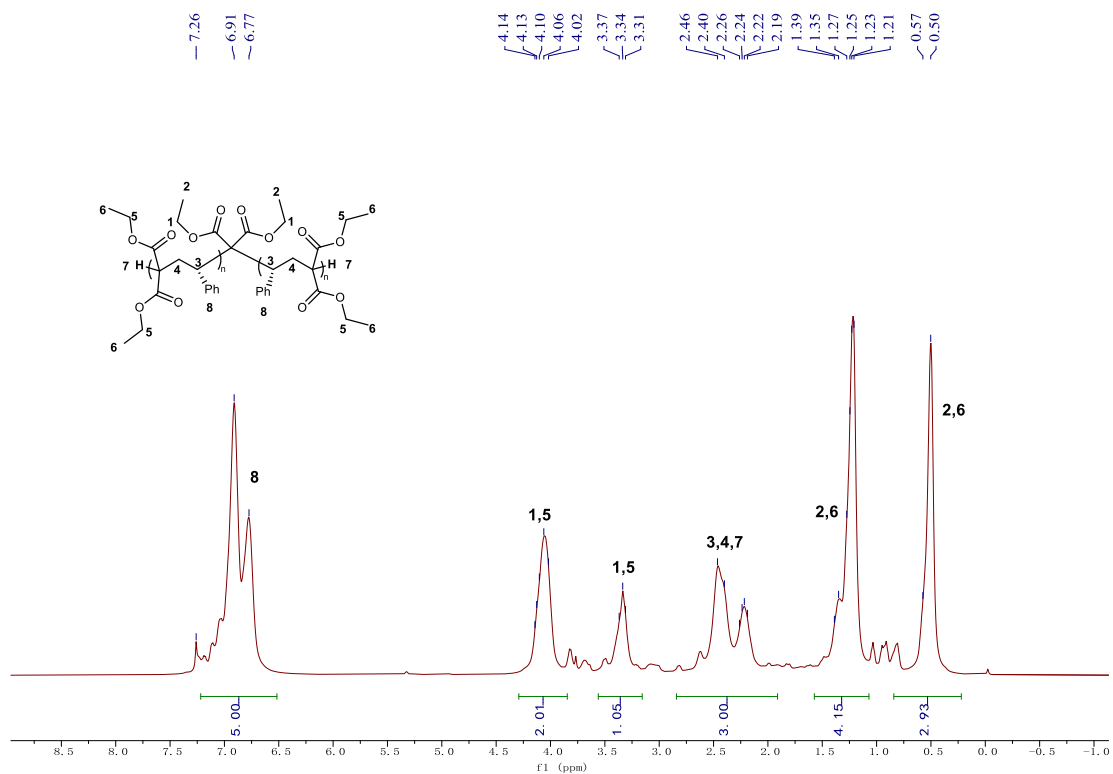

Fig. S91  $^1\text{H}$  NMR spectrum of P[(S)-M1] in  $\text{CDCl}_3$

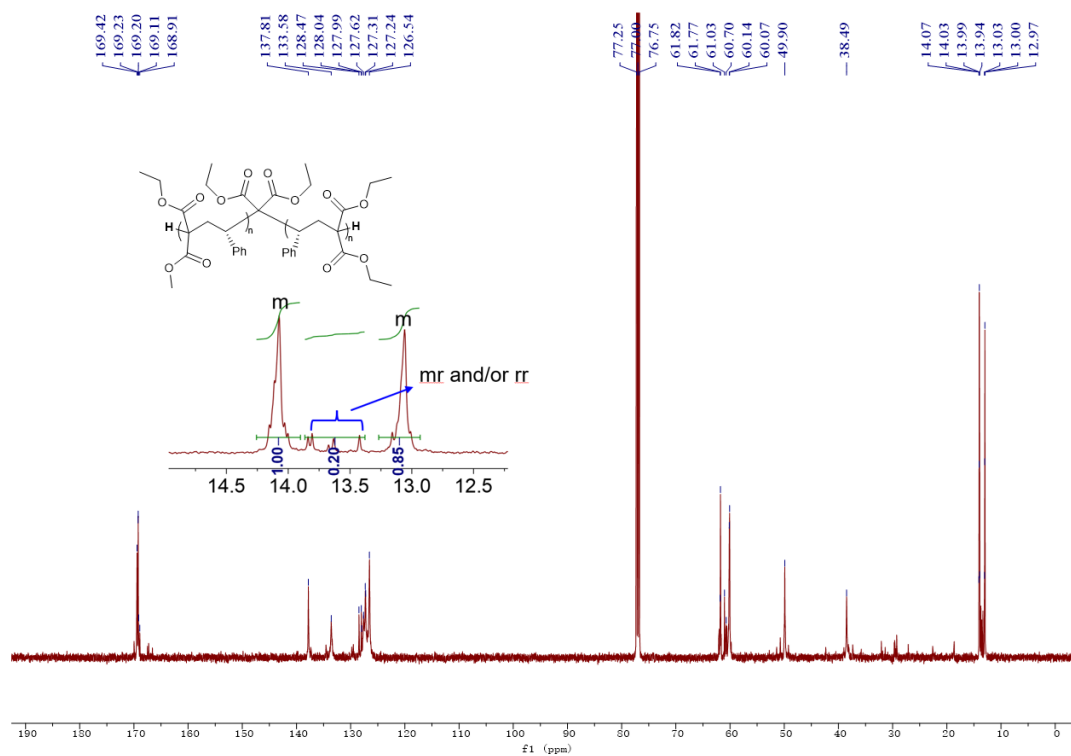

Fig. S92  $^{13}\text{C}$  NMR spectrum of P[(S)-M1] in  $\text{CDCl}_3$ . The tacticity was determined to be  $> 90\%$ m.

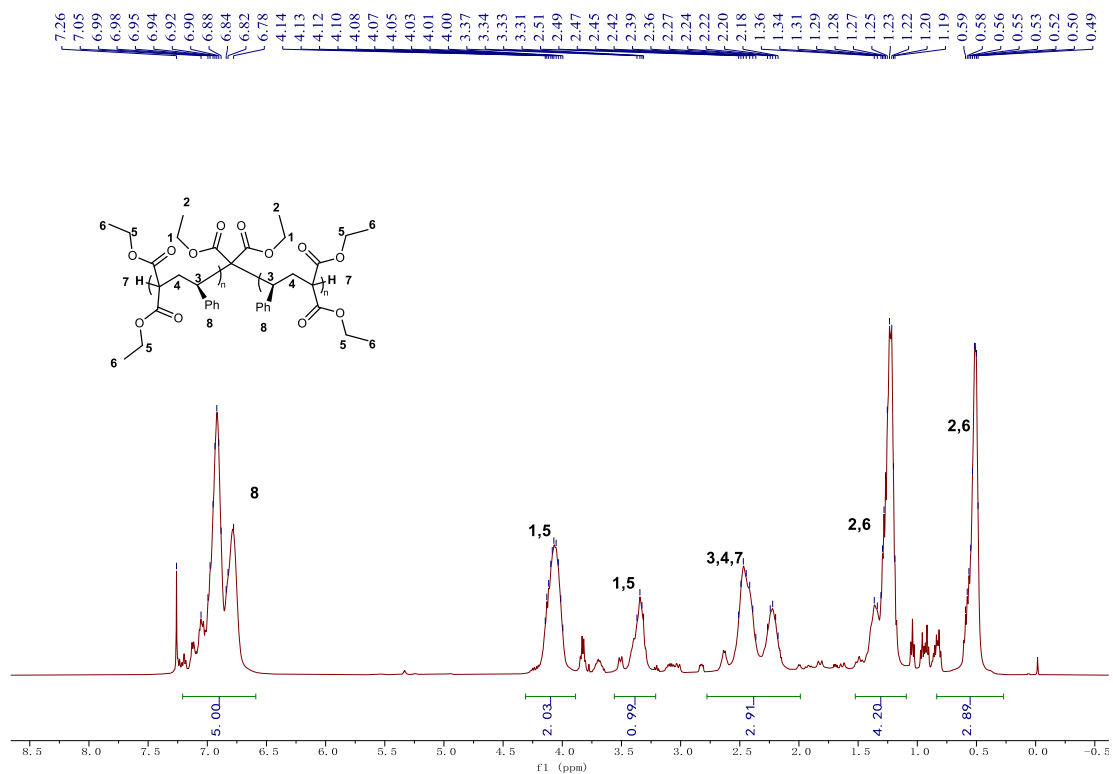

Fig. S93 <sup>1</sup>H NMR spectrum of P[(R)-M1] in CDCl<sub>3</sub>

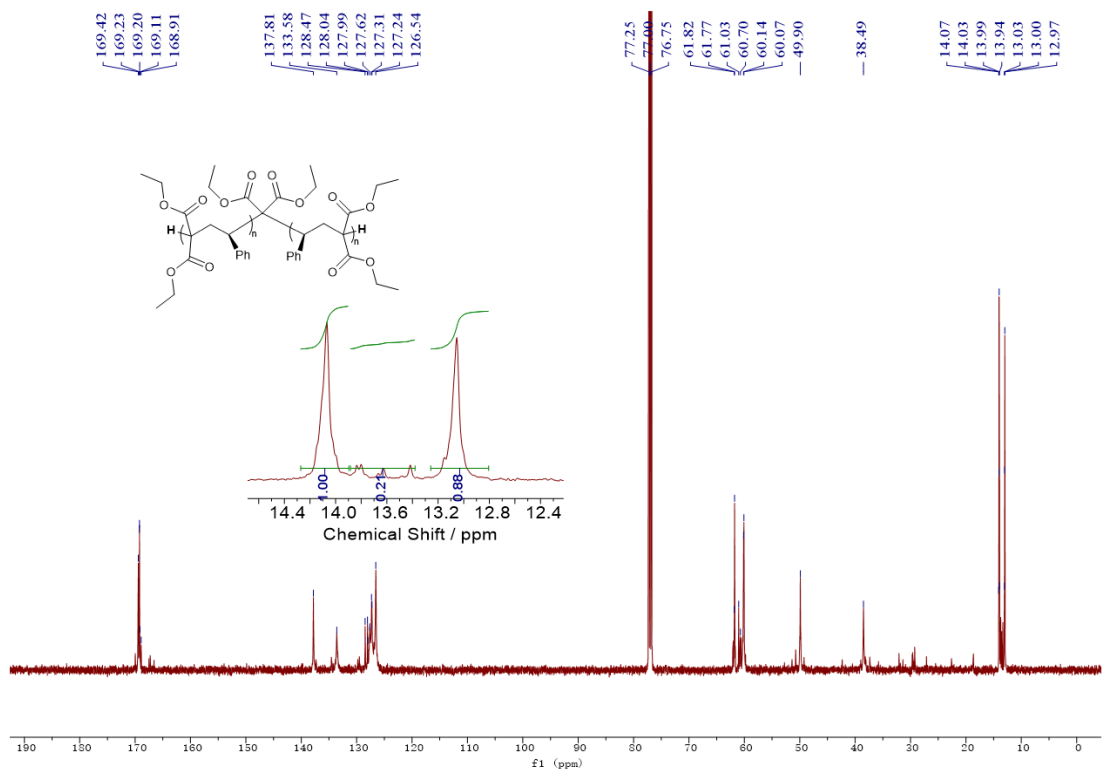

Fig. S94 <sup>13</sup>C NMR spectrum of P[(R)-M1] in CDCl<sub>3</sub>. The tacticity was determined to be > 90%*m*.

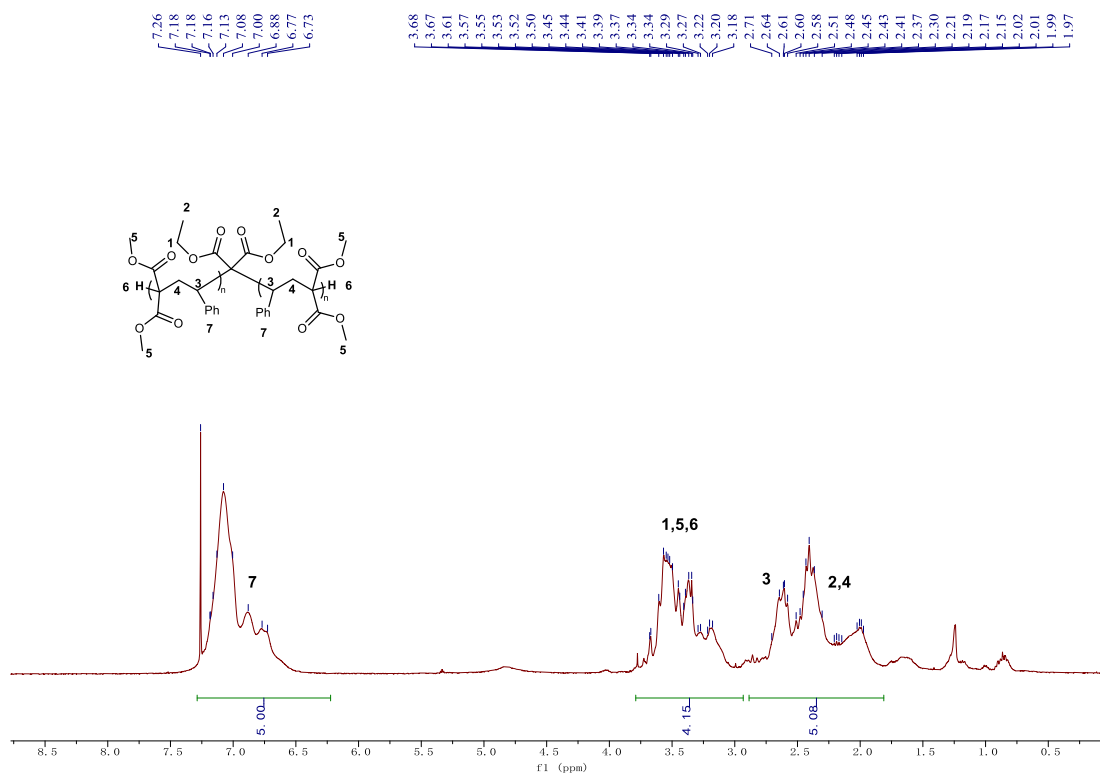

Fig. S95  $^1\text{H}$  NMR spectrum of PM2 in  $\text{CDCl}_3$

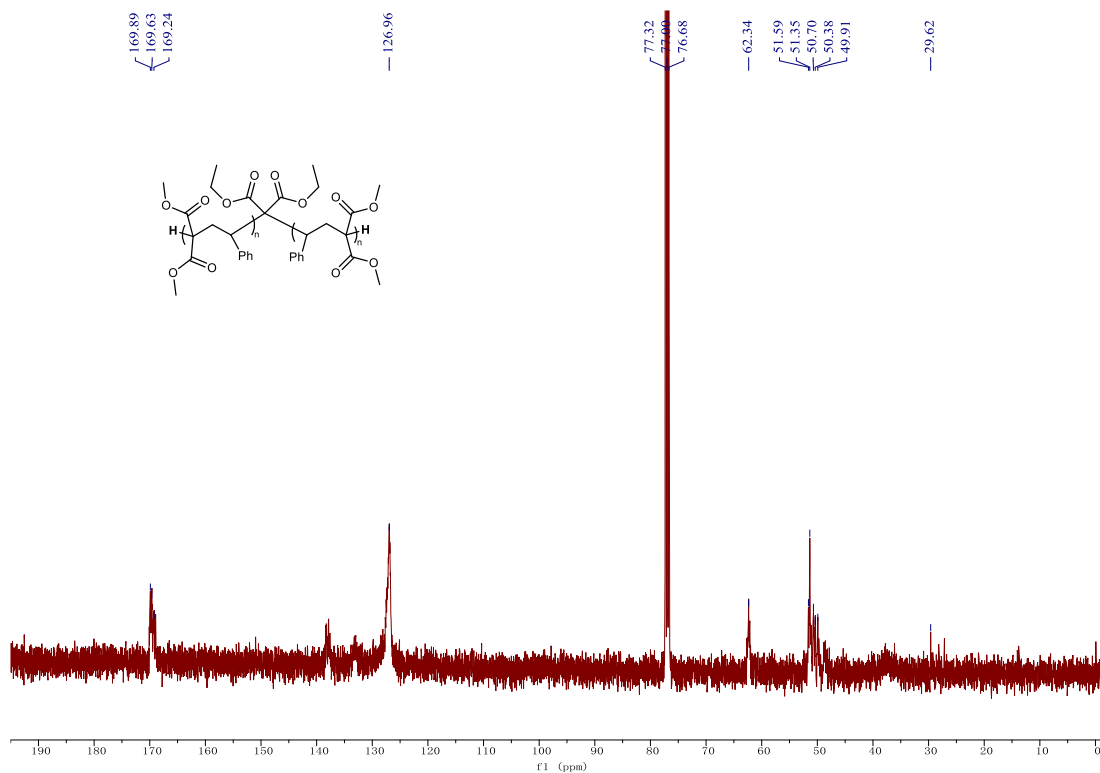

Fig. S96  $^{13}\text{C}$  NMR spectrum of PM2 in  $\text{CDCl}_3$

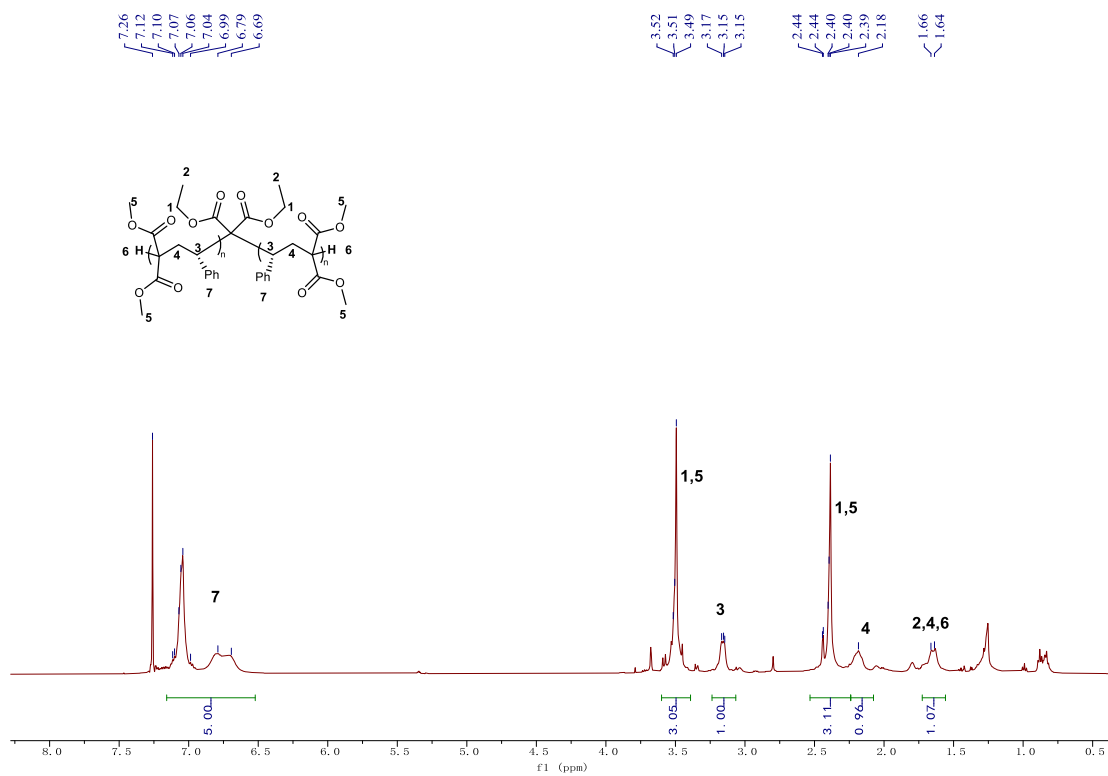

Fig. S97 <sup>1</sup>H NMR spectrum of P[(S)-M2] in CDCl<sub>3</sub>

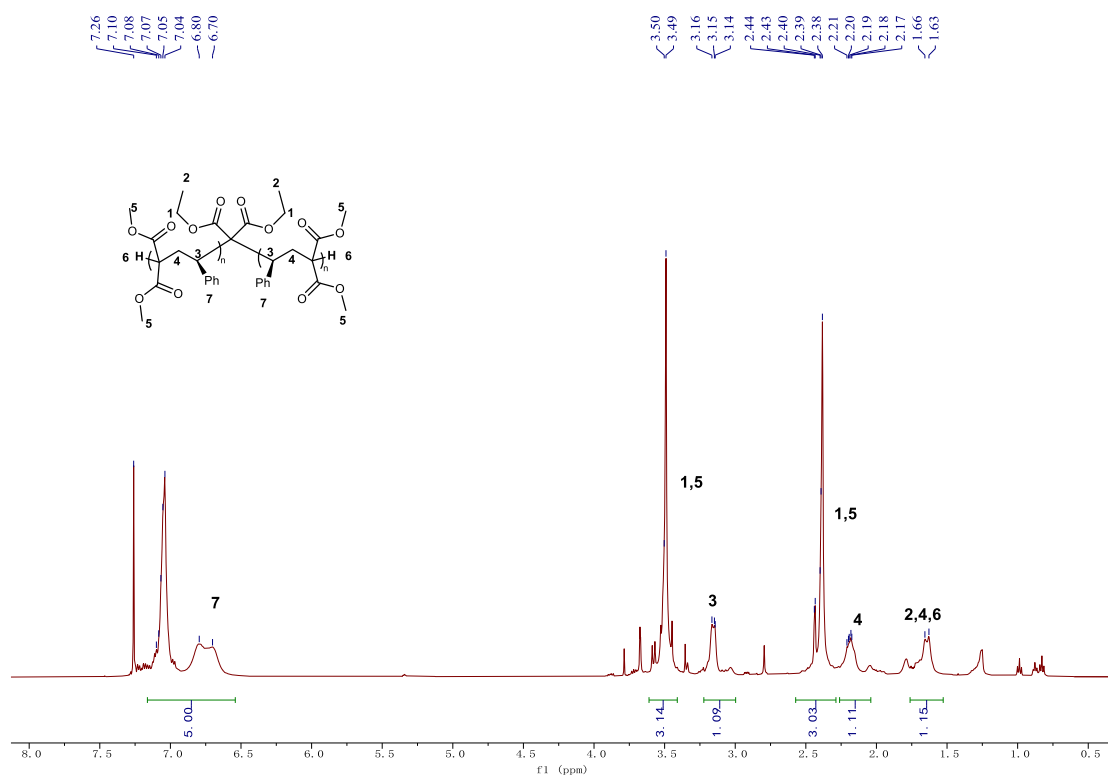

Fig. S98 <sup>1</sup>H NMR spectrum of P[(R)-M2] in CDCl<sub>3</sub>

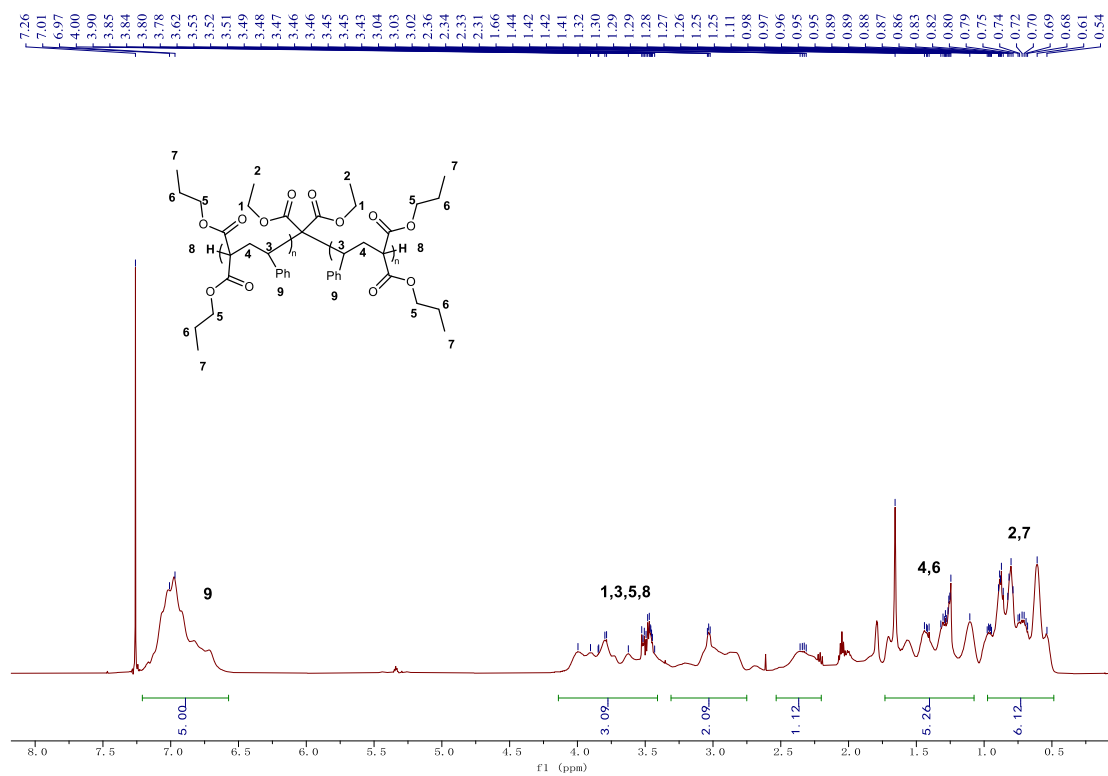

Fig. S99  $^1\text{H}$  NMR spectrum of PM3 in  $\text{CDCl}_3$

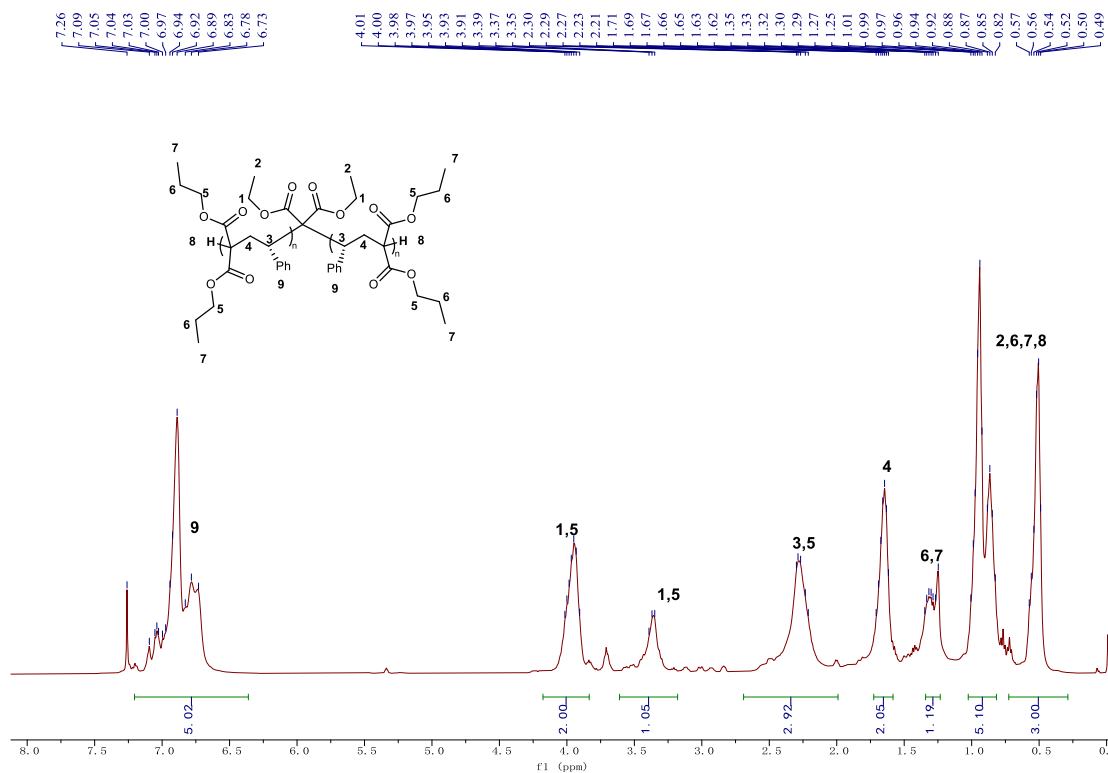

Fig. S100  $^1\text{H}$  NMR spectrum of P[(*S*)-M3] in  $\text{CDCl}_3$

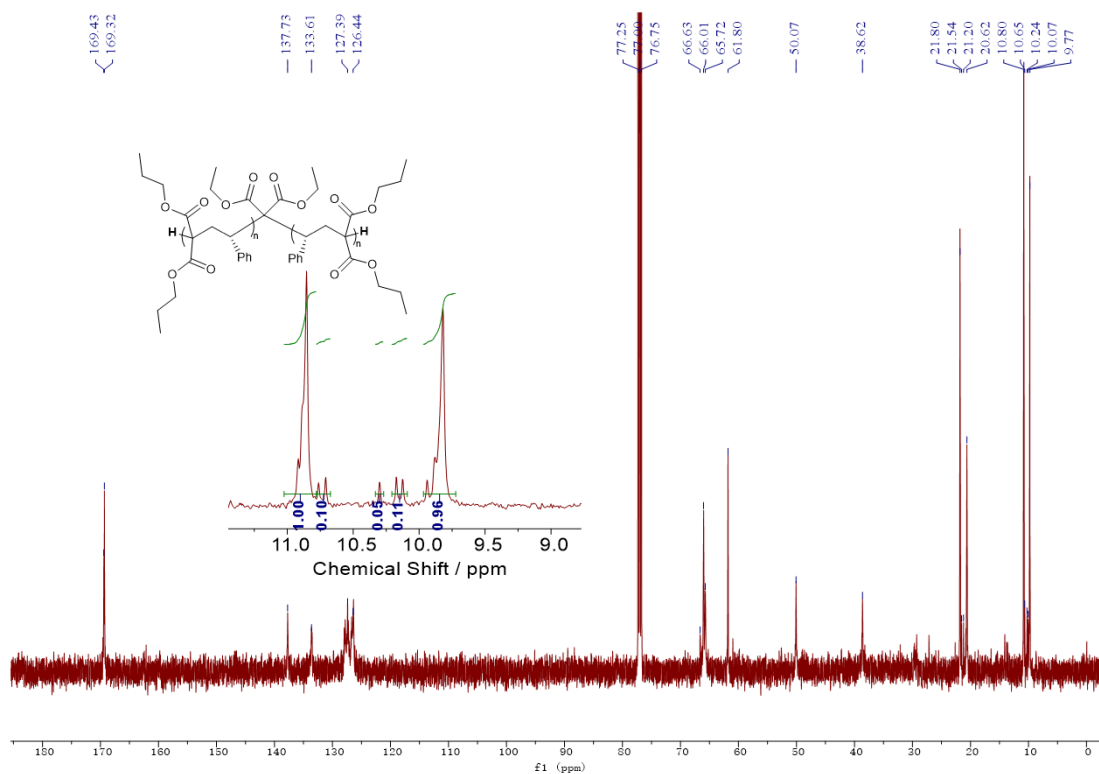

**Fig. S101** <sup>13</sup>C NMR spectrum of P[(S)-M3] in CDCl<sub>3</sub>. The tacticity was determined to be > 90%*m*.

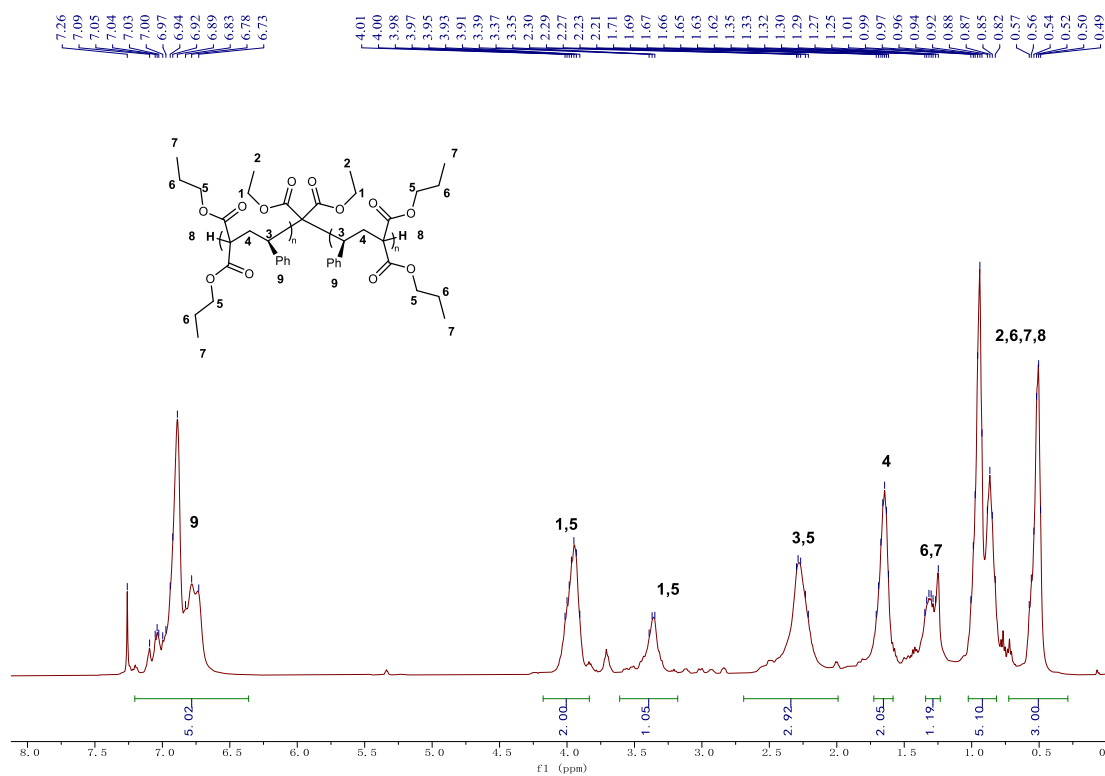

**Fig. S102** <sup>1</sup>H NMR spectrum of P[(R)-M3] in CDCl<sub>3</sub>

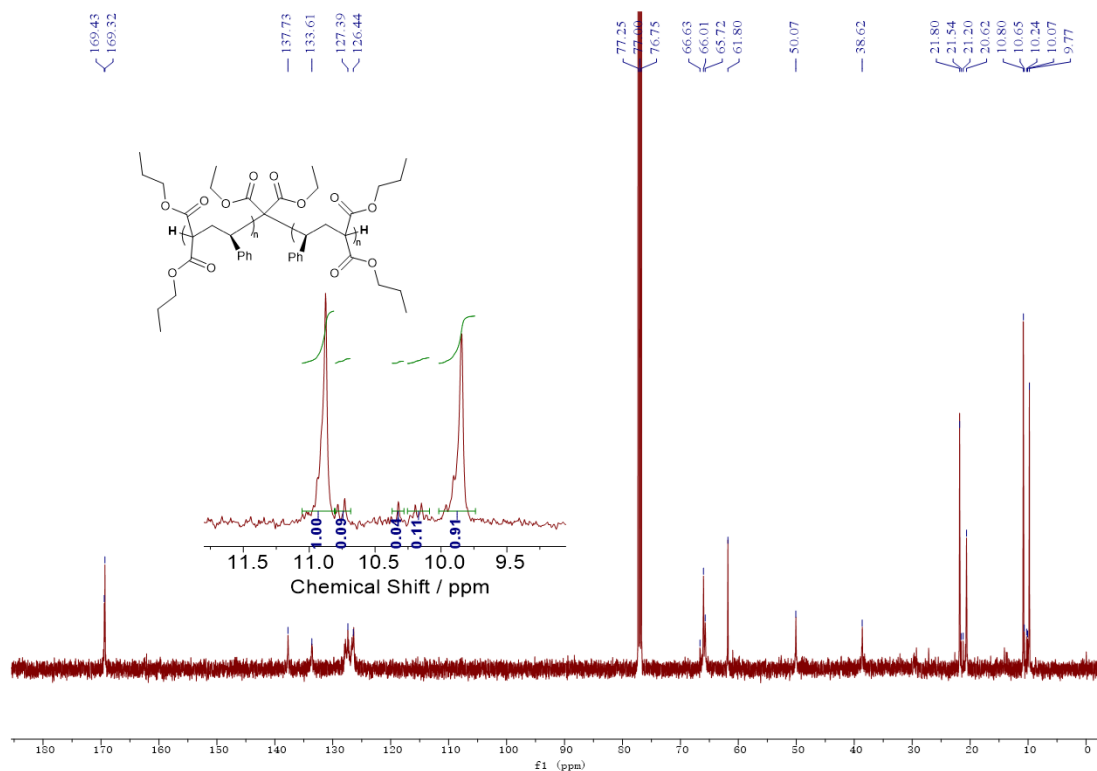

Fig. S103  $^{13}\text{C}$  NMR spectrum of P[(*R*)-M3] in  $\text{CDCl}_3$ . The tacticity was determined to be  $> 90\%$ .

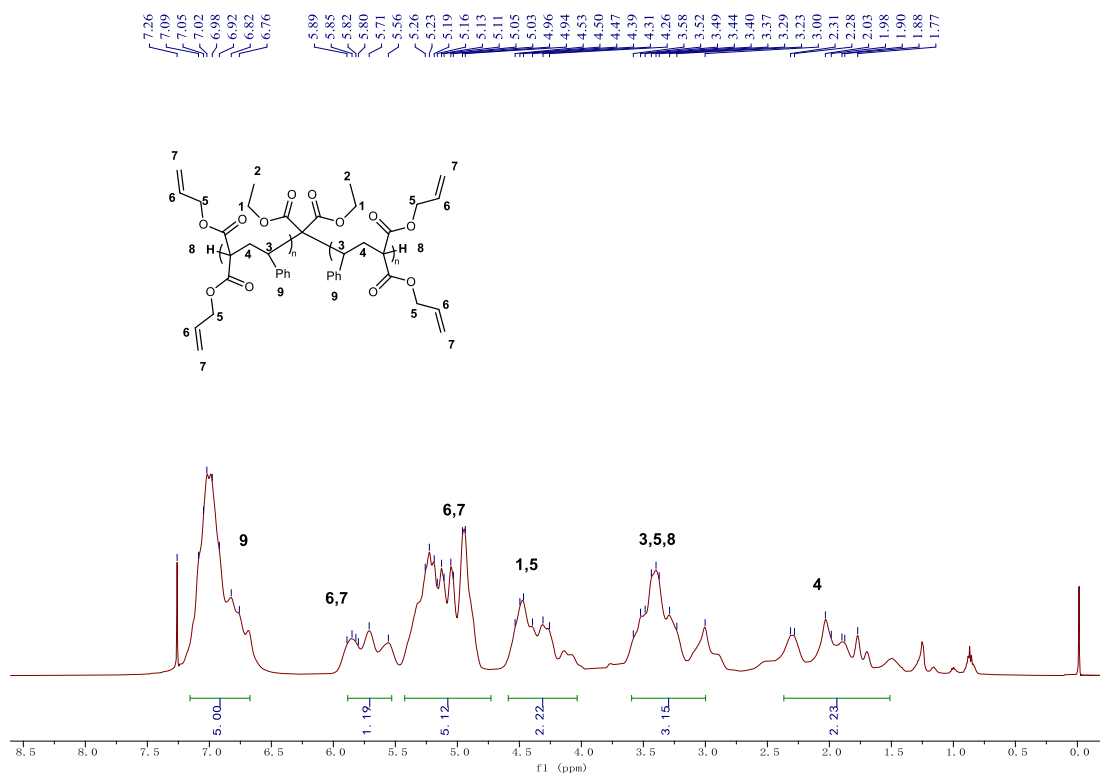

Fig. S104  $^1\text{H}$  NMR spectrum of PM4 in  $\text{CDCl}_3$





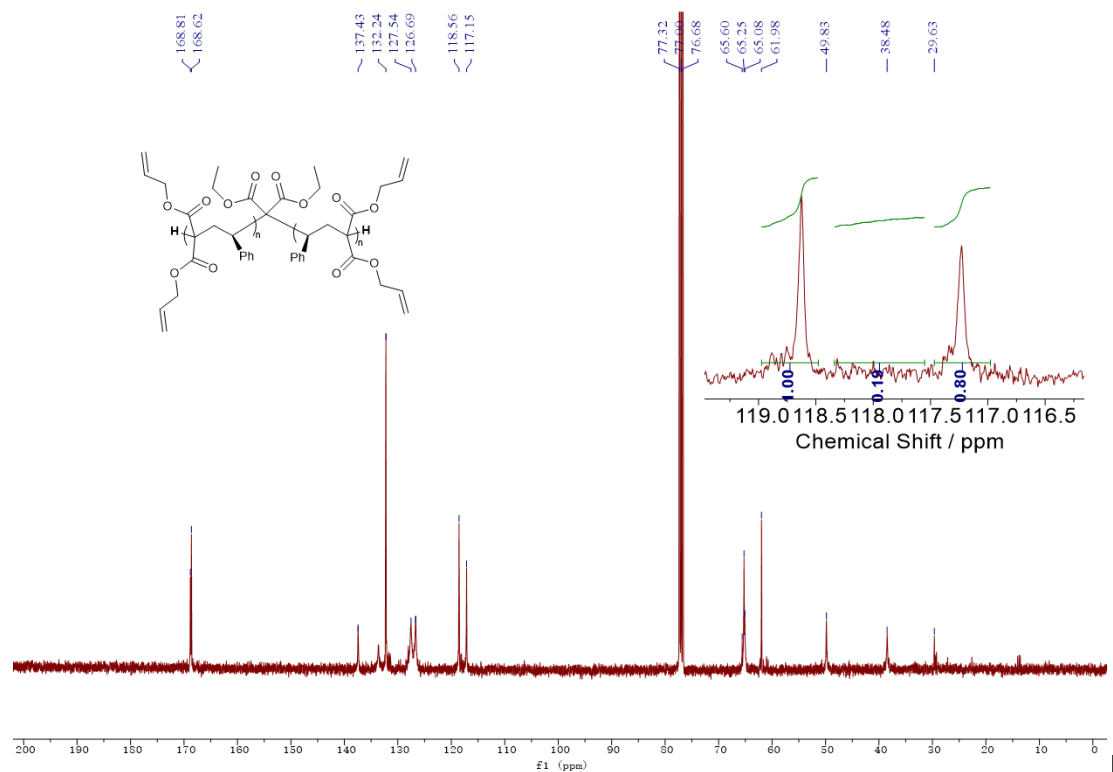

**Fig. S109**  $^{13}\text{C}$  NMR spectrum of P[(R)-M4] in  $\text{CDCl}_3$ . The tacticity was determined to be  $> 90\%$ m.

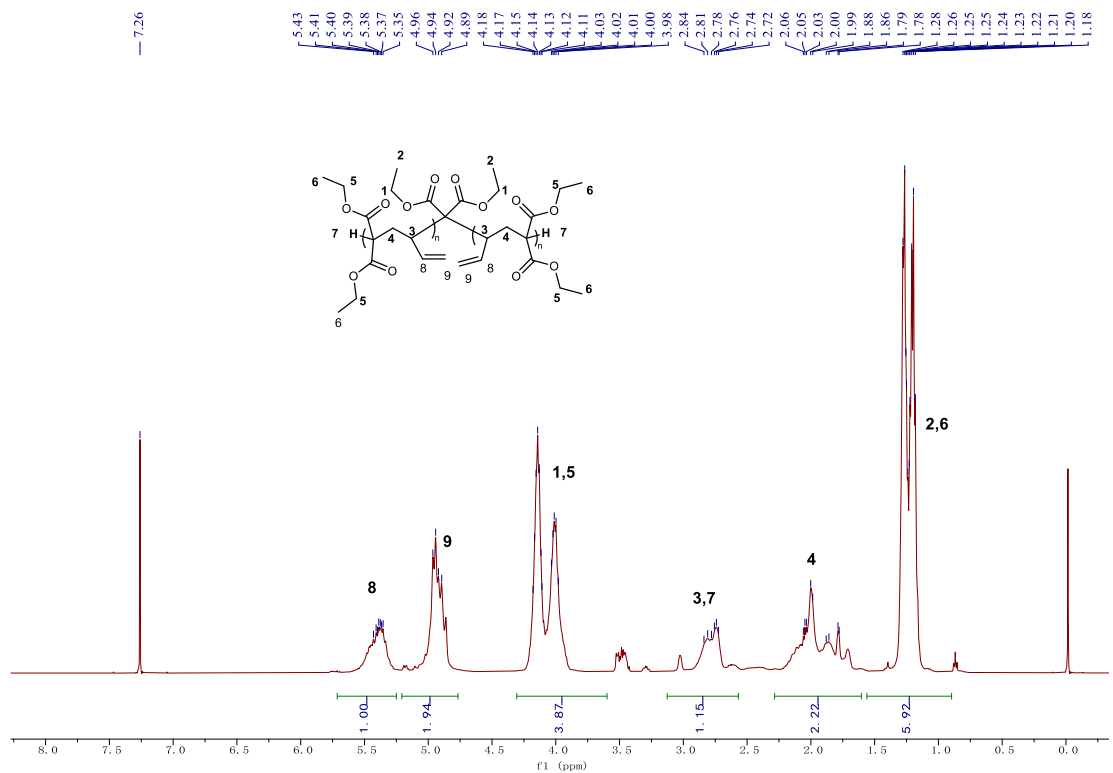

**Fig. S110**  $^1\text{H}$  NMR spectrum of PM6 in  $\text{CDCl}_3$

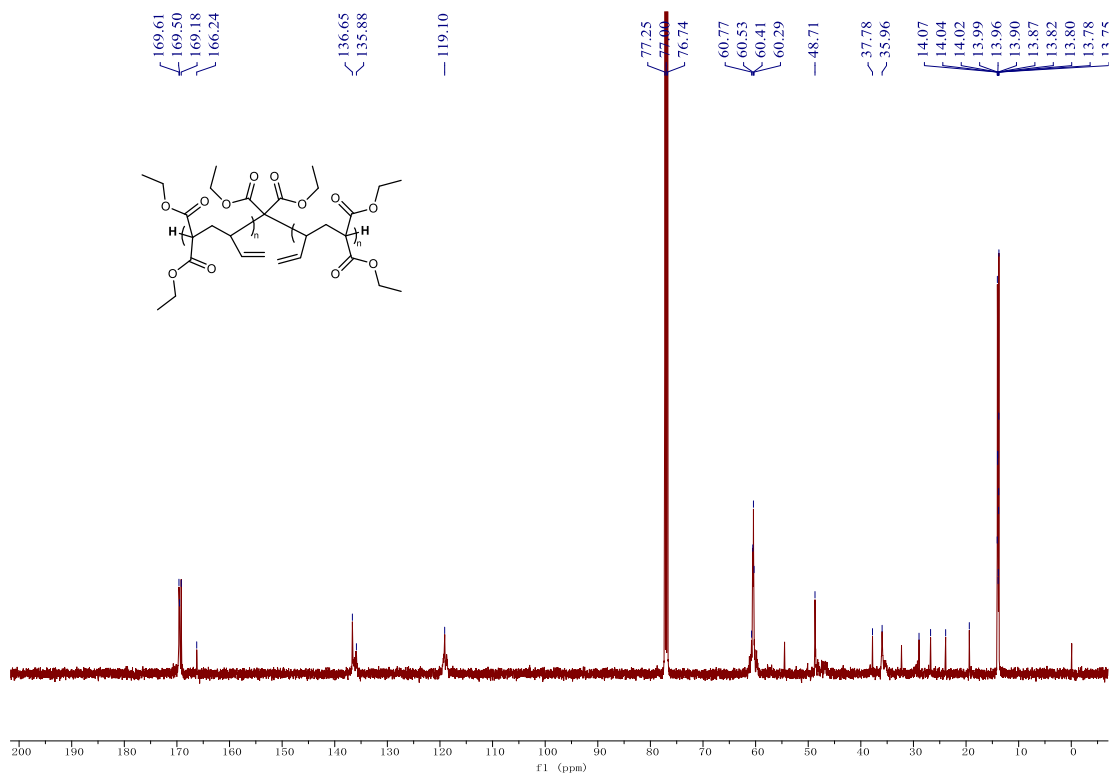

Fig. S111 <sup>13</sup>C NMR spectrum of PM6 in CDCl<sub>3</sub>

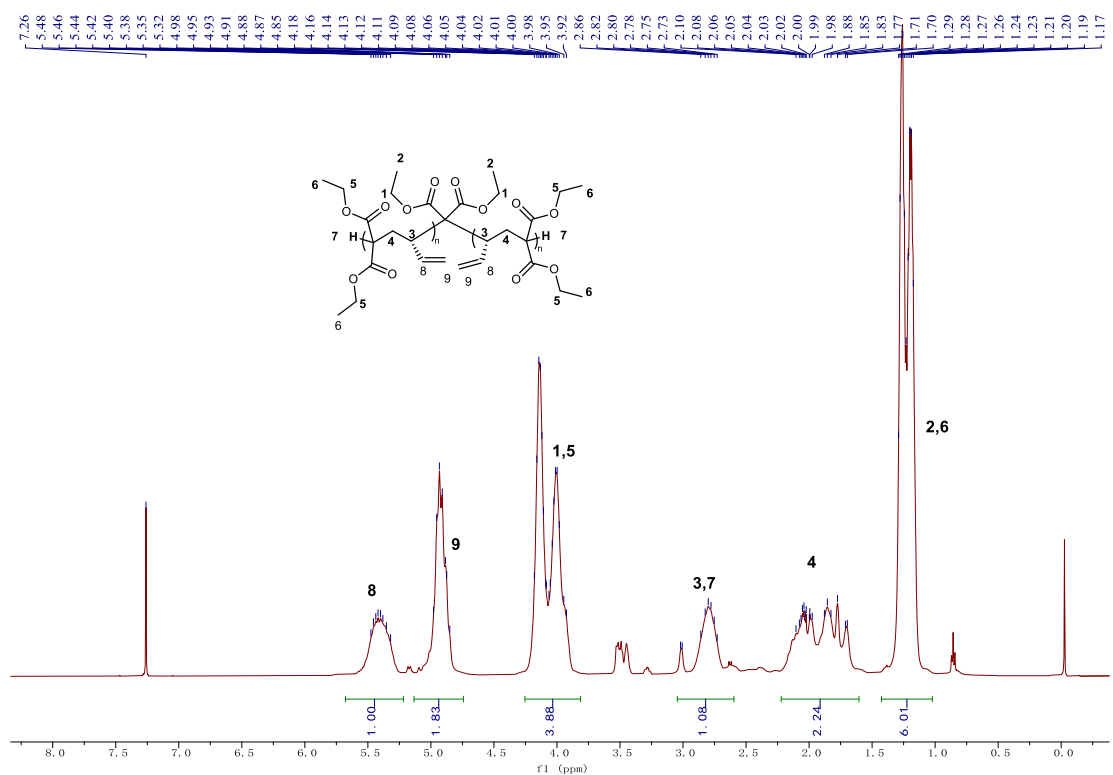

Fig. S112 <sup>1</sup>H NMR spectrum of P[(S)-M6] in CDCl<sub>3</sub>

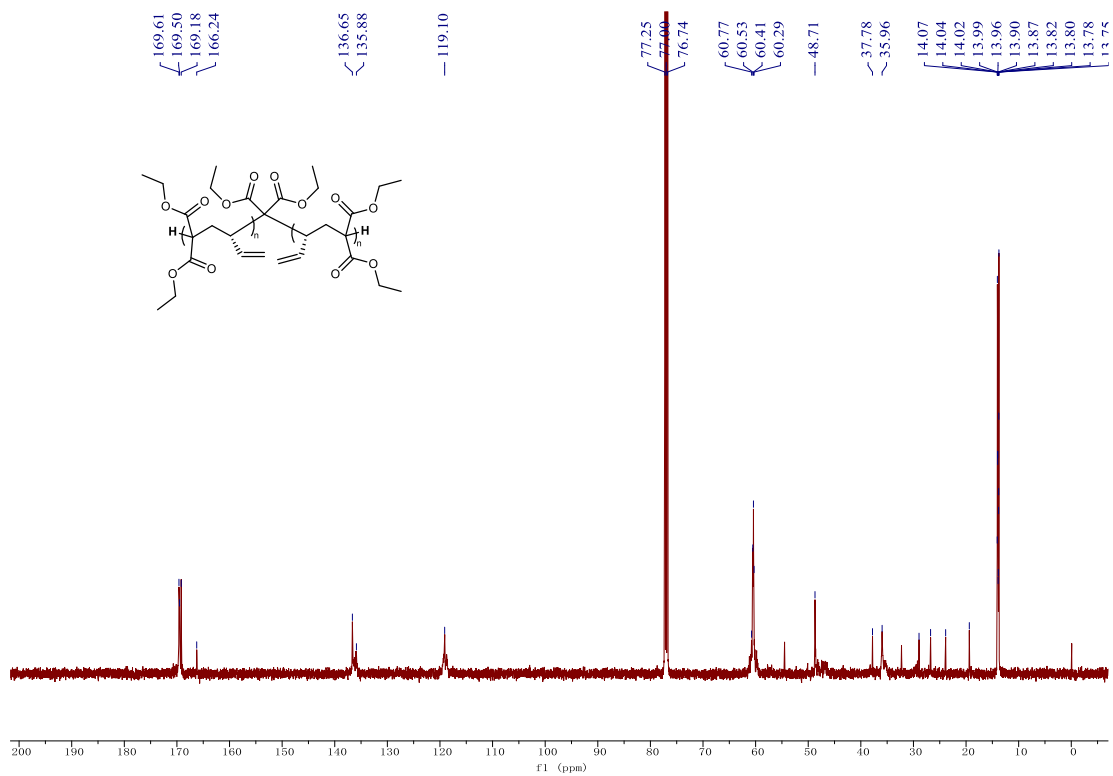

Fig. S113 <sup>13</sup>C NMR spectrum of P[(S)-M6] in CDCl<sub>3</sub>

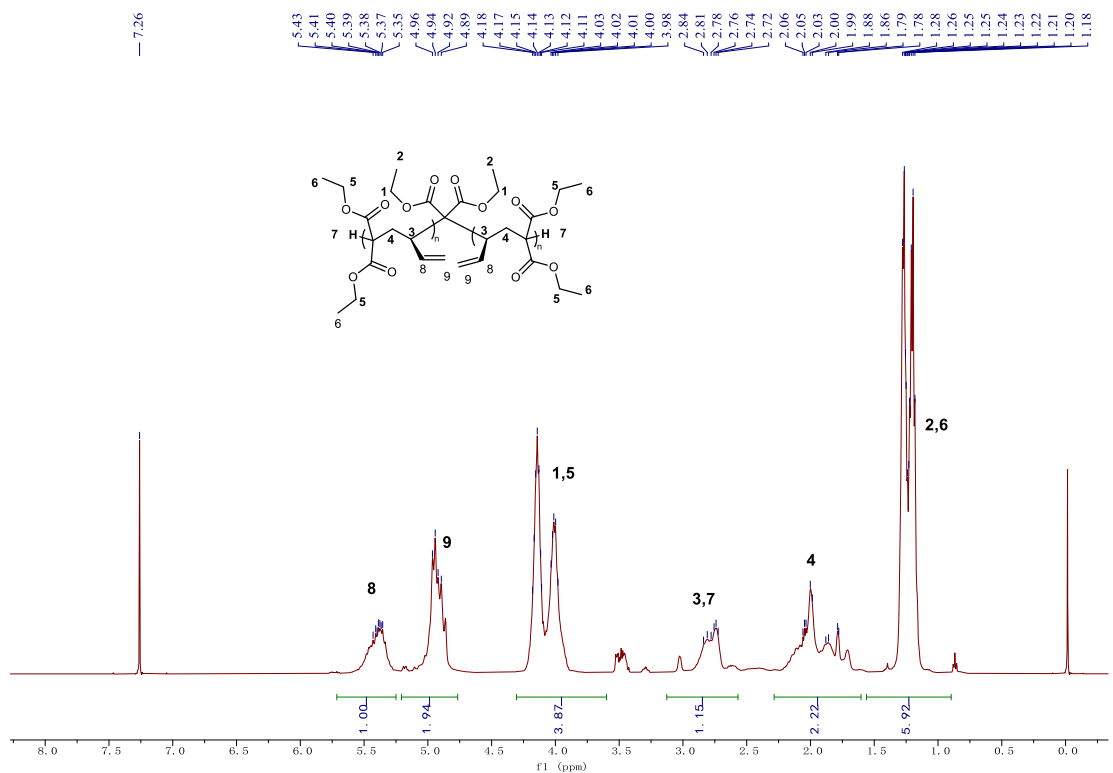

Fig. S114 <sup>1</sup>H NMR spectrum of P[(R)-M6] in CDCl<sub>3</sub>

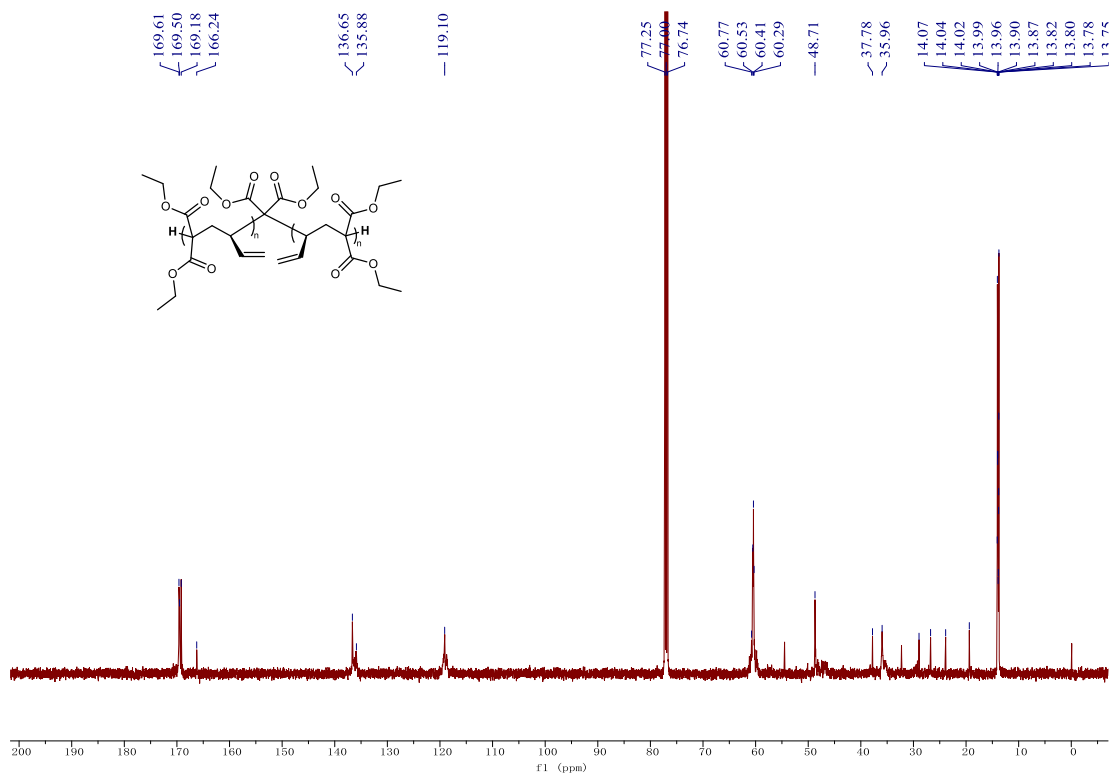

**Fig. S115**  $^{13}\text{C}$  NMR spectrum of  $P[(R)\text{-M6}]$  in  $\text{CDCl}_3$

## 8. Specific Rotation and CD Spectra of Homopolymer

**Table S2.** Specific rotations

| monomer   | conc. (g/100 mL) in CHCl <sub>3</sub> | $[\alpha]_D^{20}$ |
|-----------|---------------------------------------|-------------------|
| P[(S)-M1] | 0.428                                 | +17.92            |
| P[(R)-M1] | 0.330                                 | -16.67            |
| P[(S)-M2] | 0.270                                 | +21.63            |
| P[(R)-M2] | 0.312                                 | -17.92            |
| P[(S)-M3] | 0.380                                 | +6.32             |
| P[(R)-M3] | 0.298                                 | -4.97             |
| P[(S)-M4] | 1.135                                 | +10.12            |
| P[(R)-M4] | 0.360                                 | -9.81             |
| P[(S)-M6] | 1.980                                 | -1.23             |
| P[(R)-M6] | 1.930                                 | +1.18             |

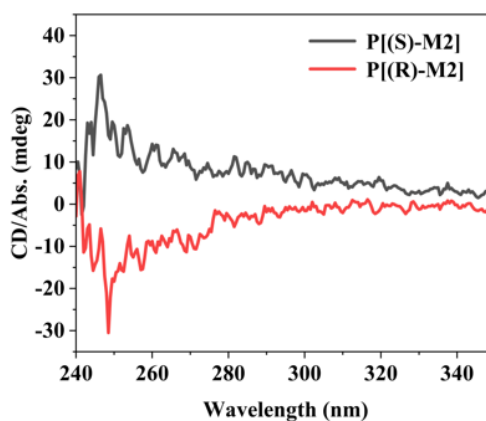

**Fig. S116** CD spectra of P[(S)-M2] and P[(R)-M2].in CHCl<sub>3</sub> at  $1 \times 10^{-5}$  M.

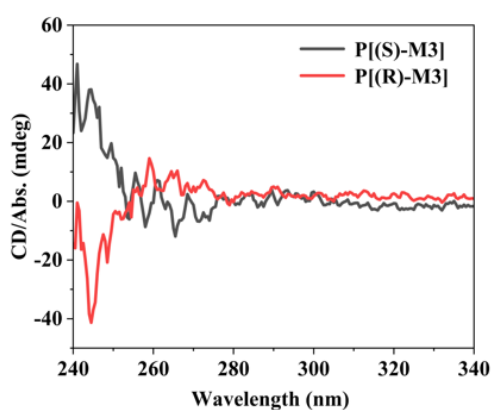

**Fig. S117** CD spectra of P[(S)-M3] and P[(R)-M3] in CHCl<sub>3</sub> at  $1 \times 10^{-5}$  M.

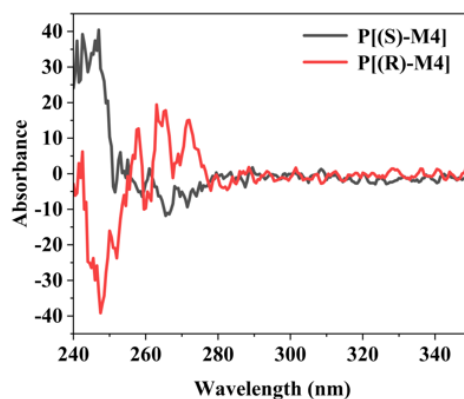

**Fig. S118** CD spectra of P[(S)-M4] and P[(R)-M4] in CHCl<sub>3</sub> at  $1 \times 10^{-5}$  M.

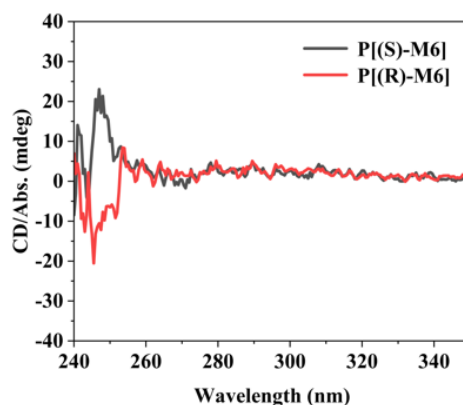

**Fig. S119** CD spectra of P[(S)-M6] and P[(R)-M6] in CHCl<sub>3</sub> at  $1 \times 10^{-5}$  M.

## 9. Computational Details

### 9.1 Computational Methods

All calculations were performed using Gaussian16<sup>5</sup> unless otherwise specified. Geometry optimizations were carried out with the M06-2X<sup>6</sup> functional with D3<sup>7</sup> dispersion correction. Optimizations used the Def2-SV(P)<sup>8</sup> basis set for all atoms. Vibrational frequencies were calculated to verify stationary points as minima or first-order saddle points (transition states). Enthalpies reported are the sum of  $E_{(large)} + \Delta E_{ZPE(small)} + \Delta U_{(small)} + nRT$ .  $E$  is the SCF energy.  $\Delta E_{ZPE(small)}$  is the zero-point energy correction.  $\Delta U_{(small)}$  is the thermal energy vibrational, rotational, and translational corrections.  $R$  is the gas constant.  $T$  is the temperature at 298 K unless otherwise specified. Small = M06-2X-D3/Def2-SV(P). Large = PWPB95-D3(BJ)<sup>9</sup>/Def2-TZVPP. Calculations correspond to 1 atm with no concentration corrections. Gibbs free energies reported in the table below are the sum of  $E_{(large)} + \Delta E_{ZPE(small)} + \Delta U_{(small)} + nRT + T\Delta S_{(small)}$ . PWPB95-D3(BJ)/Def2-TZVPP is computed using Orca 6.1<sup>10</sup> based on the optimized structures to obtain single point energies for the  $E_{(large)}$ . The SMD<sup>11</sup> model with acetonitrile parameters was utilized as the implicit solvent model unless otherwise specified.

## 9.2 Confirmation of Reference Point (Starting Material)

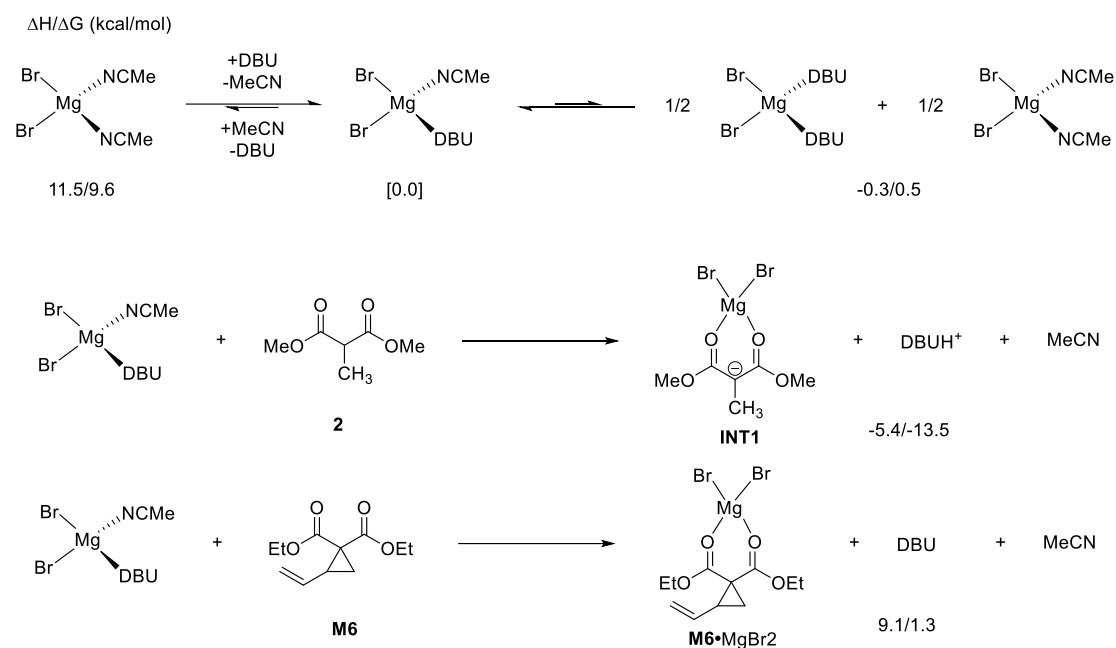

**Fig. S120** Computed energy profile for the ground state of  $\text{Mg}^{2+}$  and the formation of intermediates **INT1** and **M6•MgBr<sub>2</sub>**, energy shown in kcal/mol.

We investigated the ground state of the  $\text{MgBr}_2$  catalyst (**Fig. S117**). In the presence of MeCN and DBU,  $\text{MgBr}_2$  can form three potential coordination complexes:  $\text{MgBr}_2(\text{MeCN})_2$ ,  $\text{MgBr}_2(\text{DBU})_2$ , and  $\text{MgBr}_2(\text{MeCN})(\text{DBU})$ . Given that DBU is present in stoichiometric equivalence to  $\text{MgBr}_2$ , the transformation from  $\text{MgBr}_2(\text{MeCN})_2$  to  $\text{MgBr}_2(\text{MeCN})(\text{DBU})$  is exergonic by 9.6 kcal/mol. Conversely, the further transformation to the bis-DBU species is endergonic by 0.5 kcal/mol. Thus, the predominant species under reaction conditions is  $\text{MgBr}_2(\text{MeCN})(\text{DBU})$ . Upon the introduction of initiator **2** and monomer **M6**, **2** is rapidly converted into **INT1** with a Gibbs energy decrease of 13.5 kcal/mol, driven by the Lewis acid-enhanced acidity of the  $\alpha$ -H in **2**. In contrast, monomer **M6** remains structurally uncoordinated, as the transformation is endergonic by 1.3 kcal/mol (**Fig. S117**).

## 9.3 Absolute and Relative Energies

| SMD(MeCN)-M06-2X-D3/Def2-SV(P)           |              |              |              |                   |                  |                  |
|------------------------------------------|--------------|--------------|--------------|-------------------|------------------|------------------|
| Species                                  | EE           | H            | G            | $\Delta\text{EE}$ | $\Delta\text{H}$ | $\Delta\text{G}$ |
| DBU                                      | -461.514705  | -461.256717  | -461.302558  |                   |                  |                  |
| DBUH+                                    | -461.996478  | -461.723684  | -461.769707  |                   |                  |                  |
| MeCN                                     | -132.592936  | -132.542833  | -132.571348  |                   |                  |                  |
| $\text{MgBr}_2(\text{DBU})(\text{MeCN})$ | -5942.153937 | -5941.83324  | -5941.910756 | 0.0               | 0.0              | 0.0              |
| $\text{MgBr}_2(\text{DBU})_2$            | -6271.099295 | -6270.569759 | -6270.659132 | -0.2              | -0.2             | 0.6              |
| $\text{MgBr}_2(\text{MeCN})_2$           | -5613.209103 | -5613.097402 | -5613.160511 | 14.5              | 13.8             | 11.9             |
| S3                                       | -534.937016  | -534.761115  | -534.811711  |                   |                  |                  |
| INT1                                     | -5882.508751 | -5882.336599 | -5882.40307  | -4.5              | -5.5             | -13.6            |
| M6                                       | -728.809559  | -728.532832  | -728.596163  |                   |                  |                  |

| M6•MgBr2                                  | -6076.837641 | -6076.551023 | -6076.63011  | 11.4  | 9.7   | 1.8   |
|-------------------------------------------|--------------|--------------|--------------|-------|-------|-------|
| TS1                                       | -11959.33841 | -11958.87901 | -11958.99952 | 16.4  | 15.1  | 22.9  |
| INT2&INT4                                 | -11959.38806 | -11958.92628 | -11959.04375 | -14.7 | -14.5 | -4.8  |
| TS2                                       | -6076.788301 | -6076.504046 | -6076.582496 | 42.4  | 39.2  | 31.7  |
| INT3                                      | -6076.789075 | -6076.504342 | -6076.585078 | 41.9  | 39.0  | 30.1  |
| M1                                        | -882.300585  | -881.972983  | -882.04137   |       |       |       |
| M1•MgBr2                                  | -6230.329708 | -6229.992339 | -6230.07678  | 10.8  | 9.0   | 0.9   |
| TS3                                       | -12112.83361 | -12112.32304 | -12112.44681 | 13.8  | 12.7  | 21.6  |
| <b>SMD(MeCN)-PWPB95-D3(BJ)/Def2-TZVPP</b> |              |              |              |       |       |       |
| Species                                   | EE           | H            | G            | ΔEE   | ΔH    | ΔG    |
| DBU                                       | -461.9144324 | -461.6564444 | -461.7022854 |       |       |       |
| DBUH+                                     | -462.4029509 | -462.1301569 | -462.1761799 |       |       |       |
| MeCN                                      | -132.7182203 | -132.6681173 | -132.6966323 |       |       |       |
| MgBr2(DBU)(MeCN)                          | -5943.195768 | -5942.875071 | -5942.952587 | 0.0   | 0.0   | 0.0   |
| MgBr2(DBU)2                               | -6272.412239 | -6271.882703 | -6271.972076 | -0.3  | -0.3  | 0.5   |
| MgBr2(MeCN)2                              | -5613.980173 | -5613.868472 | -5613.931581 | 12.2  | 11.5  | 9.6   |
| S3                                        | -535.4483614 | -535.2724604 | -535.3230564 |       |       |       |
| INT1                                      | -5883.530011 | -5883.357859 | -5883.42433  | -4.4  | -5.4  | -13.5 |
| M6                                        | -729.4778835 | -729.2011565 | -729.2644875 |       |       |       |
| M6•MgBr2                                  | -6078.023611 | -6077.736993 | -6077.81608  | 10.9  | 9.2   | 1.3   |
| TS1                                       | -11961.54388 | -11961.08448 | -11961.20499 | 17.0  | 15.7  | 23.5  |
| INT2&INT4                                 | -11961.58844 | -11961.12666 | -11961.24412 | -10.9 | -10.7 | -1.0  |
| TS2                                       | -6077.981513 | -6077.697258 | -6077.775708 | 37.3  | 34.1  | 26.6  |
| INT3                                      | -6077.981976 | -6077.697243 | -6077.777979 | 37.0  | 34.1  | 25.2  |
| M1                                        | -883.0827607 | -882.7551587 | -882.8235457 |       |       |       |
| M1•MgBr2                                  | -6231.629608 | -6231.292239 | -6231.37668  | 10.2  | 8.4   | 0.3   |
| TS3                                       | -12115.15422 | -12114.64365 | -12114.76742 | 13.6  | 12.5  | 21.4  |

#### DBU

|   |             |             |             |
|---|-------------|-------------|-------------|
| C | -0.92672000 | -1.47749900 | -0.38698900 |
| C | 0.36826500  | -0.72356300 | -0.12595800 |
| C | -2.08818300 | -1.15208800 | 0.55906700  |
| C | -0.85039400 | 1.46049600  | 0.26713800  |
| C | -2.94850300 | 0.00612300  | 0.05305200  |
| C | -2.10412700 | 1.13456400  | -0.54172000 |
| H | -1.24115800 | -1.31551100 | -1.43408700 |
| H | -1.08591600 | 1.43915200  | 1.35133500  |
| H | -1.68474100 | -0.91618600 | 1.55963100  |
| H | -3.56237600 | 0.39778700  | 0.88276600  |
| H | -0.64568500 | -2.53553400 | -0.30164000 |
| H | -2.71556100 | -2.04937400 | 0.68653700  |
| H | -0.55695600 | 2.49592500  | 0.03673400  |
| H | -3.65157900 | -0.35995600 | -0.71550700 |
| H | -2.71492600 | 2.05013000  | -0.60537700 |
| H | -1.79668500 | 0.89521900  | -1.57375100 |

|   |            |             |             |
|---|------------|-------------|-------------|
| C | 1.58401200 | 1.34445200  | 0.30207400  |
| H | 1.51711700 | 2.36839000  | -0.09973300 |
| H | 1.70583400 | 1.43189400  | 1.40090900  |
| C | 2.77235800 | 0.61570600  | -0.29692700 |
| H | 3.71025500 | 1.10345100  | 0.01261700  |
| H | 2.71204300 | 0.66443700  | -1.39831800 |
| C | 2.72301000 | -0.83491900 | 0.15631900  |
| H | 3.48838300 | -1.43104400 | -0.37024000 |
| H | 2.97571500 | -0.89599300 | 1.23288300  |
| N | 1.42871300 | -1.45145400 | -0.06545800 |
| N | 0.33813400 | 0.65396700  | -0.01755400 |

**DBUH<sup>+</sup>**

|   |             |             |             |
|---|-------------|-------------|-------------|
| C | 0.93561700  | 1.50156100  | -0.25659800 |
| C | -0.30767800 | 0.66579500  | -0.05948300 |
| C | 2.13472900  | 1.10162600  | 0.60584400  |
| C | 0.90418300  | -1.50120600 | 0.21867900  |
| C | 2.96519700  | -0.00804300 | -0.03576000 |
| C | 2.08403400  | -1.09228800 | -0.65441300 |
| H | 1.19834000  | 1.47226900  | -1.32872700 |
| H | 1.20495200  | -1.58288500 | 1.27852200  |
| H | 1.77707100  | 0.78851300  | 1.60160900  |
| H | 3.62833300  | -0.45312100 | 0.72509200  |
| H | 0.64349400  | 2.53838600  | -0.03817700 |
| H | 2.75902500  | 1.99382400  | 0.76801300  |
| H | 0.56245400  | -2.49552700 | -0.09776700 |
| H | 3.61485900  | 0.41718200  | -0.81957300 |
| H | 2.68507800  | -1.99780900 | -0.83461200 |
| H | 1.69990900  | -0.77800000 | -1.63977600 |
| C | -1.56417400 | -1.33464000 | 0.43550200  |
| H | -1.44265800 | -2.38661300 | 0.14730800  |
| H | -1.73782400 | -1.29470700 | 1.52501700  |
| C | -2.71968100 | -0.70550900 | -0.32121400 |
| H | -3.65893700 | -1.20356900 | -0.04116300 |
| H | -2.56634400 | -0.84148900 | -1.40434300 |
| C | -2.78933900 | 0.76951900  | 0.01625500  |
| H | -3.44084400 | 1.31505600  | -0.68088200 |
| H | -3.16967500 | 0.92430900  | 1.03927500  |
| N | -1.45010800 | 1.33904500  | -0.08734500 |
| N | -0.29735100 | -0.64511500 | 0.13349800  |
| H | -1.38233900 | 2.34578900  | -0.21575800 |

**MeCN**

|   |             |             |             |
|---|-------------|-------------|-------------|
| N | -1.43377600 | -0.00002400 | -0.00002100 |
| C | -0.28030500 | 0.00005500  | 0.00004100  |
| C | 1.17873600  | -0.00001300 | -0.00003500 |
| H | 1.54858500  | -0.97472300 | -0.35257700 |
| H | 1.54868500  | 0.79273800  | -0.66763800 |

|                                          |             |             |             |
|------------------------------------------|-------------|-------------|-------------|
| H                                        | 1.54857400  | 0.18189900  | 1.02033100  |
| <b>MgBr<sub>2</sub>(DBU)(MeCN)</b>       |             |             |             |
| Mg                                       | -1.28319900 | -0.26696200 | -0.10433000 |
| N                                        | 0.53666200  | 0.70553000  | -0.33098700 |
| C                                        | 1.77104000  | 0.30588400  | -0.14248800 |
| C                                        | 0.28788200  | 2.10672800  | -0.66750200 |
| C                                        | 1.96220900  | -1.17715400 | 0.11507200  |
| N                                        | 2.83623600  | 1.14001000  | -0.14284500 |
| C                                        | 1.25119900  | 3.01754900  | 0.06587000  |
| H                                        | -0.75723400 | 2.35423500  | -0.42192100 |
| H                                        | 0.39383500  | 2.24224600  | -1.75977400 |
| C                                        | 3.09733800  | -1.85783600 | -0.65853400 |
| H                                        | 2.09601300  | -1.33242500 | 1.20089700  |
| H                                        | 1.00994200  | -1.65802500 | -0.14134500 |
| C                                        | 4.25059700  | 0.73410200  | -0.19587000 |
| C                                        | 2.65896400  | 2.58993500  | -0.28995300 |
| H                                        | 1.10124800  | 4.07024500  | -0.21761100 |
| H                                        | 1.08877300  | 2.92723600  | 1.15394000  |
| C                                        | 4.43064600  | -1.79621700 | 0.08440000  |
| H                                        | 3.19122300  | -1.39183600 | -1.65460500 |
| H                                        | 2.81915000  | -2.90869100 | -0.83742800 |
| C                                        | 4.66349800  | -0.42156800 | 0.71147300  |
| H                                        | 4.53512600  | 0.52105800  | -1.24325000 |
| H                                        | 4.81326700  | 1.62817900  | 0.10553400  |
| H                                        | 3.38934900  | 3.07991100  | 0.37209500  |
| H                                        | 2.90241400  | 2.88306500  | -1.32751100 |
| H                                        | 5.25132700  | -2.03246000 | -0.61460400 |
| H                                        | 4.45328700  | -2.56505900 | 0.87589200  |
| H                                        | 5.73324000  | -0.29967500 | 0.94683100  |
| H                                        | 4.12280000  | -0.32524200 | 1.66805400  |
| N                                        | -2.02521800 | 1.03226900  | 1.42598300  |
| C                                        | -2.44773600 | 1.70837800  | 2.25622800  |
| C                                        | -2.98206400 | 2.56401400  | 3.30175600  |
| H                                        | -2.85349700 | 3.61682500  | 3.00792500  |
| H                                        | -4.05173300 | 2.34272400  | 3.43670900  |
| H                                        | -2.44025600 | 2.36976400  | 4.23984100  |
| Br                                       | -2.65108200 | 0.24905500  | -2.09498900 |
| Br                                       | -1.47734900 | -2.50922900 | 0.90397600  |
| <b>MgBr<sub>2</sub>(DBU)<sub>2</sub></b> |             |             |             |
| Mg                                       | -0.03717800 | 0.69650700  | 0.24615500  |
| N                                        | -1.35131900 | -0.68393100 | -0.63522700 |
| C                                        | -2.65530800 | -0.63354300 | -0.52021000 |
| C                                        | -0.75734600 | -1.83352600 | -1.30880000 |
| C                                        | -3.22557700 | 0.65067700  | 0.05790200  |
| N                                        | -3.47817900 | -1.65233400 | -0.86796100 |
| C                                        | -1.48410900 | -3.11049000 | -0.93484300 |

|   |             |             |             |
|---|-------------|-------------|-------------|
| H | 0.31012200  | -1.88446600 | -1.04949900 |
| H | -0.81464800 | -1.68160600 | -2.40370700 |
| C | -4.44791300 | 1.23365300  | -0.66088500 |
| H | -3.44355900 | 0.49548200  | 1.12910600  |
| H | -2.41446100 | 1.39064100  | 0.01633400  |
| C | -4.94109900 | -1.57153900 | -1.00380700 |
| C | -2.94061600 | -2.94408100 | -1.31447100 |
| H | -1.06365600 | -3.98311000 | -1.45777600 |
| H | -1.38890100 | -3.28246500 | 0.15152800  |
| C | -5.76481200 | 0.67654500  | -0.12430700 |
| H | -4.36271800 | 1.04049700  | -1.74410900 |
| H | -4.43221500 | 2.32913000  | -0.54397100 |
| C | -5.68463900 | -0.83253900 | 0.10601400  |
| H | -5.20096200 | -1.14523000 | -1.99084000 |
| H | -5.28395900 | -2.61518400 | -1.01499900 |
| H | -3.55152900 | -3.73431500 | -0.85031900 |
| H | -3.06626300 | -3.02858700 | -2.40933500 |
| H | -6.57658900 | 0.90384500  | -0.83671100 |
| H | -6.02296100 | 1.17655900  | 0.82513000  |
| H | -6.70194700 | -1.25143800 | 0.17129300  |
| H | -5.19233100 | -1.05991100 | 1.06667300  |
| N | 1.66356400  | -0.51778000 | 0.46990800  |
| C | 2.88735100  | -0.45186200 | 0.01093700  |
| C | 1.29191200  | -1.58706700 | 1.39728900  |
| C | 3.17974000  | 0.68203100  | -0.95195300 |
| N | 3.85833400  | -1.34904100 | 0.31481000  |
| C | 2.09806800  | -2.84517500 | 1.14881200  |
| H | 0.21036200  | -1.78304300 | 1.28951500  |
| H | 1.43619800  | -1.23341200 | 2.43358200  |
| C | 4.46881800  | 1.47141500  | -0.69701200 |
| H | 3.18474700  | 0.27116300  | -1.97786700 |
| H | 2.31894400  | 1.36107000  | -0.90090400 |
| C | 5.29641000  | -1.18483000 | 0.04798700  |
| C | 3.56635000  | -2.47961800 | 1.20100900  |
| H | 1.87693800  | -3.61148500 | 1.90715300  |
| H | 1.85180600  | -3.26215600 | 0.15638300  |
| C | 5.67359700  | 0.87186300  | -1.42050100 |
| H | 4.65921200  | 1.51789500  | 0.38924700  |
| H | 4.31607000  | 2.51224100  | -1.02507200 |
| C | 5.68356200  | -0.65437700 | -1.32992500 |
| H | 5.75265300  | -0.56124700 | 0.84013400  |
| H | 5.72174900  | -2.19175000 | 0.15934300  |
| H | 4.18575100  | -3.32809000 | 0.87296300  |
| H | 3.86608000  | -2.22864100 | 2.23553600  |
| H | 6.60323300  | 1.27862700  | -0.98655500 |
| H | 5.65924300  | 1.17149500  | -2.48269700 |
| H | 6.69324000  | -1.03038700 | -1.56210700 |
| H | 5.00752200  | -1.10050700 | -2.07849800 |

|    |             |            |             |
|----|-------------|------------|-------------|
| Br | -0.62968700 | 1.15640100 | 2.63674200  |
| Br | 0.00099600  | 2.75407500 | -1.16454000 |

**MgBr<sub>2</sub>(MeCN)<sub>2</sub>**

|    |             |             |             |
|----|-------------|-------------|-------------|
| Mg | -0.18562500 | 0.00416300  | 0.00589100  |
| N  | 1.24835600  | 1.51353400  | 0.33756500  |
| C  | 2.01739000  | 2.35085700  | 0.51661100  |
| N  | 1.20259700  | -1.51395300 | -0.45780000 |
| C  | 1.93935500  | -2.36434000 | -0.69991700 |
| C  | 2.98911100  | 3.40544500  | 0.74212100  |
| H  | 3.92426800  | 2.95900900  | 1.11331700  |
| H  | 3.17639200  | 3.93149400  | -0.20626100 |
| H  | 2.58961900  | 4.10969100  | 1.48760700  |
| C  | 2.86877300  | -3.43710100 | -1.00432200 |
| H  | 3.76550100  | -3.01196700 | -1.48042600 |
| H  | 3.14774700  | -3.94759700 | -0.07005500 |
| H  | 2.38423000  | -4.14949700 | -1.68922300 |
| Br | -1.22477700 | -0.55677900 | 2.14440000  |
| Br | -1.42678600 | 0.56628300  | -2.02185600 |

**2**

|   |             |             |             |
|---|-------------|-------------|-------------|
| C | -0.04539000 | 0.84749900  | -0.49907100 |
| C | -1.09362800 | -0.22671900 | -0.25642700 |
| O | -0.90200700 | -1.40364600 | -0.42345300 |
| O | -2.25690800 | 0.28208400  | 0.13000300  |
| C | -3.31705400 | -0.64895400 | 0.33343900  |
| C | 1.31446800  | 0.17615100  | -0.47084500 |
| O | 2.01197400  | -0.01611200 | -1.43065100 |
| O | 1.65455300  | -0.17274500 | 0.76823500  |
| C | 2.90234300  | -0.84140700 | 0.91541300  |
| H | -3.53569100 | -1.19068900 | -0.59970100 |
| H | -3.04779100 | -1.36985700 | 1.12047200  |
| H | 2.90270000  | -1.78237600 | 0.34347300  |
| H | 3.72670800  | -0.20135800 | 0.56467700  |
| C | -0.13715100 | 2.02311100  | 0.47421600  |
| H | -1.09792000 | 2.54328200  | 0.34850900  |
| H | -0.05585000 | 1.67511500  | 1.51569900  |
| H | 0.67702400  | 2.73876800  | 0.27719500  |
| H | -4.18753400 | -0.05638200 | 0.64194000  |
| H | 3.01356700  | -1.04957300 | 1.98724000  |
| H | -0.19763600 | 1.19834500  | -1.53293000 |

**INT1**

|   |            |             |             |
|---|------------|-------------|-------------|
| C | 2.53496600 | -0.01922700 | -0.01932200 |
| C | 1.81432700 | -1.23535900 | -0.04064300 |
| O | 0.56453100 | -1.37813000 | -0.05536400 |
| O | 2.56455000 | -2.34501000 | -0.04663600 |
| C | 1.88837800 | -3.59210700 | -0.05613700 |

|    |             |             |             |
|----|-------------|-------------|-------------|
| C  | 1.82258600  | 1.20278600  | -0.04447000 |
| O  | 0.57787500  | 1.37579000  | -0.06027500 |
| O  | 2.60599000  | 2.28864000  | -0.05329600 |
| C  | 1.96800000  | 3.55616800  | -0.06895100 |
| H  | 1.25534600  | -3.70583600 | 0.83784800  |
| H  | 1.26355800  | -3.69653800 | -0.95689200 |
| H  | 1.34863200  | 3.67523800  | -0.97164800 |
| H  | 1.33676900  | 3.69135600  | 0.82327200  |
| Mg | -0.83781900 | 0.00417700  | -0.00691700 |
| C  | 4.04323900  | 0.01323700  | -0.00124700 |
| H  | 4.44940700  | -1.00121700 | 0.11194800  |
| H  | 4.46180500  | 0.44384300  | -0.92929200 |
| H  | 4.42420400  | 0.62784100  | 0.83272300  |
| H  | 2.67426100  | -4.35946200 | -0.05652800 |
| H  | 2.77654400  | 4.29954700  | -0.07031100 |
| Br | -2.03502900 | 0.01644000  | 2.15512400  |
| Br | -2.21837700 | 0.00903900  | -2.05309400 |

#### M6

|   |             |             |             |
|---|-------------|-------------|-------------|
| C | -0.06775600 | 0.62691600  | 1.52017900  |
| C | -0.11405000 | -0.06172600 | 0.17859600  |
| C | -1.35816300 | -0.82449900 | -0.16025300 |
| O | -1.37321200 | -1.93196600 | -0.62950100 |
| O | -2.46012400 | -0.15155900 | 0.16960100  |
| C | -4.81300600 | 0.11254600  | 0.40198900  |
| C | -3.71114000 | -0.81871400 | -0.04252100 |
| C | 1.13611200  | -0.60511800 | -0.45436900 |
| O | 1.20417000  | -0.95894000 | -1.60105100 |
| O | 2.17697900  | -0.59613400 | 0.37604800  |
| C | 4.48354000  | -0.84303800 | 0.90610300  |
| C | 3.44353100  | -0.97396700 | -0.18030600 |
| H | -0.94959400 | 0.50705100  | 2.15471700  |
| H | 0.90026300  | 0.61749700  | 2.02789300  |
| H | -5.78982200 | -0.37361400 | 0.25056600  |
| H | -4.70731100 | 0.35986700  | 1.47076800  |
| H | -4.79337200 | 1.04679300  | -0.18237100 |
| H | -3.79692700 | -1.07434600 | -1.11052100 |
| H | -3.71146700 | -1.75833500 | 0.53262600  |
| H | 5.46906600  | -1.13607800 | 0.51078400  |
| H | 4.54594200  | 0.19761000  | 1.26413900  |
| H | 4.24024400  | -1.49745100 | 1.75881800  |
| H | 3.36878700  | -2.00748900 | -0.55392700 |
| H | 3.66011600  | -0.31763600 | -1.03873300 |
| C | -0.20058000 | 1.46905900  | 0.29740900  |
| H | -1.19496600 | 1.86751100  | 0.07902300  |
| C | 0.93182300  | 2.29912600  | -0.17937400 |
| C | 0.77350600  | 3.43483000  | -0.86303500 |
| H | -0.22461000 | 3.81077200  | -1.11843000 |

|   |            |            |             |
|---|------------|------------|-------------|
| H | 1.63718800 | 4.02606800 | -1.18412800 |
| H | 1.94105000 | 1.94807200 | 0.07150300  |

**M6•MgBr<sub>2</sub>**

|    |             |             |             |
|----|-------------|-------------|-------------|
| C  | -3.16030600 | 0.58475100  | -1.01036100 |
| C  | -1.71924300 | 0.34337000  | -0.60887500 |
| C  | -0.76242100 | 1.48180900  | -0.66630800 |
| O  | 0.45445800  | 1.38162000  | -0.53136800 |
| O  | -1.33867200 | 2.63416000  | -0.84721600 |
| C  | -1.42544400 | 5.00975800  | -1.02537900 |
| C  | -0.51268700 | 3.82523300  | -0.83759300 |
| C  | -1.14700500 | -1.02698700 | -0.72584200 |
| O  | 0.02783100  | -1.30913300 | -0.50684800 |
| O  | -2.01521600 | -1.93376700 | -1.06400600 |
| C  | -2.78894500 | -4.15796000 | -1.43794700 |
| C  | -1.58298500 | -3.31695200 | -1.10623700 |
| H  | -3.36112600 | 1.55073900  | -1.47796600 |
| H  | -3.66658000 | -0.28092900 | -1.44462600 |
| H  | -0.82163200 | 5.93072900  | -1.02581000 |
| H  | -1.96179100 | 4.94211600  | -1.98529300 |
| H  | -2.15919700 | 5.07228900  | -0.20595800 |
| H  | 0.02271300  | 3.85697700  | 0.12318200  |
| H  | 0.22261900  | 3.73096300  | -1.65046100 |
| H  | -2.48549300 | -5.21552300 | -1.48555300 |
| H  | -3.56655900 | -4.05192200 | -0.66441500 |
| H  | -3.21030200 | -3.87059300 | -2.41443200 |
| H  | -0.79306100 | -3.39799700 | -1.86763300 |
| H  | -1.15535100 | -3.56658400 | -0.12364400 |
| Mg | 1.56595000  | -0.16797300 | 0.11739600  |
| C  | -2.87394500 | 0.55114500  | 0.43769700  |
| H  | -2.77904100 | 1.51730800  | 0.94385200  |
| C  | -3.29339500 | -0.56506900 | 1.31822300  |
| C  | -3.39632300 | -0.42608900 | 2.64207200  |
| H  | -3.15314200 | 0.52227200  | 3.13616400  |
| H  | -3.73315900 | -1.25643600 | 3.27097200  |
| H  | -3.54951000 | -1.51618000 | 0.83926900  |
| Br | 1.47918000  | -0.12393700 | 2.55701300  |
| Br | 3.55819700  | -0.50328100 | -1.23294400 |

**TS1**

|   |             |             |             |
|---|-------------|-------------|-------------|
| C | -0.19152200 | 0.21757100  | -1.02567400 |
| C | 1.30310700  | -0.02922900 | -1.01048800 |
| C | 2.18744000  | 1.08124900  | -1.21459300 |
| O | 3.43315600  | 1.05953300  | -1.16343300 |
| O | 1.56253700  | 2.21797100  | -1.48653700 |
| C | 1.40040000  | 4.52605100  | -2.01190300 |
| C | 2.34894300  | 3.40644300  | -1.65618900 |
| C | 1.83750800  | -1.33228200 | -0.73717500 |

|    |             |             |             |
|----|-------------|-------------|-------------|
| O  | 3.04125300  | -1.60568100 | -0.55869900 |
| O  | 0.93320500  | -2.29243900 | -0.67611800 |
| C  | 0.16000300  | -4.50533600 | -0.26454600 |
| C  | 1.37010600  | -3.60394400 | -0.28867700 |
| H  | -0.45000300 | 1.06189500  | -1.67258200 |
| H  | -0.78071300 | -0.68315200 | -1.24524700 |
| H  | 1.96810800  | 5.46128200  | -2.14028900 |
| H  | 0.87524300  | 4.30320700  | -2.95484600 |
| H  | 0.65349400  | 4.67449500  | -1.21521500 |
| H  | 2.88918300  | 3.60702900  | -0.71726000 |
| H  | 3.09018100  | 3.23110900  | -2.45060500 |
| H  | 0.47124700  | -5.52130900 | 0.02786500  |
| H  | -0.58992800 | -4.13948800 | 0.45462300  |
| H  | -0.31298400 | -4.54987100 | -1.25828400 |
| H  | 2.12471600  | -3.95190100 | -1.01082900 |
| H  | 1.84953900  | -3.53425600 | 0.70104800  |
| Mg | 4.43895300  | -0.27367700 | -0.07876700 |
| C  | -0.10896700 | 0.53328900  | 0.41368700  |
| H  | 0.40086800  | 1.45646600  | 0.70050300  |
| C  | -0.24212200 | -0.50869800 | 1.42275500  |
| C  | 0.26519000  | -0.35834600 | 2.65675200  |
| H  | 0.83301200  | 0.53885700  | 2.92783100  |
| H  | 0.14422400  | -1.13584700 | 3.41901800  |
| H  | -0.79176100 | -1.41174800 | 1.13133600  |
| C  | -2.01029900 | 1.88168200  | 1.00609000  |
| C  | -2.45622500 | 1.98472900  | -0.35186300 |
| O  | -3.20033400 | 1.18524400  | -0.95658700 |
| O  | -1.96743000 | 3.02817100  | -1.00926900 |
| C  | -2.31895900 | 3.17086800  | -2.38255800 |
| C  | -2.68522500 | 0.95511200  | 1.87021900  |
| O  | -3.45993100 | 0.03774600  | 1.53244600  |
| O  | -2.39677500 | 1.11136600  | 3.15281300  |
| C  | -2.95271200 | 0.17547300  | 4.07201500  |
| H  | -1.94037800 | 2.32065000  | -2.97126400 |
| H  | -3.41135400 | 3.23846200  | -2.49610300 |
| H  | -4.04993600 | 0.26143400  | 4.09136400  |
| H  | -2.66949200 | -0.85210400 | 3.79879300  |
| Mg | -4.10898800 | -0.44198400 | -0.27536100 |
| C  | -1.23447400 | 3.01084700  | 1.63473500  |
| H  | -0.59193300 | 3.50094400  | 0.88853900  |
| H  | -1.89788200 | 3.78018700  | 2.07086400  |
| H  | -0.59524900 | 2.62814900  | 2.44694700  |
| H  | -1.84649600 | 4.10313800  | -2.71638800 |
| H  | -2.53599900 | 0.43757200  | 5.05297400  |
| Br | 6.68340300  | -0.80817800 | -0.86984500 |
| Br | -2.95064500 | -2.48437700 | -1.02214400 |
| Br | -6.54800900 | -0.28542700 | -0.47635100 |
| Br | 3.94685300  | 0.38354100  | 2.25160500  |

**INT2&INT4**

|    |             |             |             |
|----|-------------|-------------|-------------|
| C  | -0.36533900 | 0.34391800  | -0.01170700 |
| C  | 1.11693700  | 0.07602800  | -0.06959300 |
| C  | 1.91754000  | 0.79537000  | -0.98723100 |
| O  | 3.16234000  | 0.72919700  | -1.13750200 |
| O  | 1.23109000  | 1.63766200  | -1.77043800 |
| C  | 0.96947800  | 3.29585800  | -3.44572300 |
| C  | 1.96237200  | 2.42535600  | -2.71173200 |
| C  | 1.73294400  | -0.79485100 | 0.86089200  |
| O  | 2.95410000  | -1.07577600 | 0.94545500  |
| O  | 0.89499500  | -1.36723600 | 1.73154100  |
| C  | 0.27391500  | -2.81726900 | 3.49868000  |
| C  | 1.43084900  | -2.28594500 | 2.68432300  |
| H  | -0.75717400 | 0.39029900  | -1.04227400 |
| H  | -0.86539300 | -0.50234600 | 0.48409200  |
| H  | 1.50022700  | 3.92992200  | -4.17398100 |
| H  | 0.23713200  | 2.67766200  | -3.98954200 |
| H  | 0.42966900  | 3.94970800  | -2.74083700 |
| H  | 2.70921500  | 3.03031100  | -2.17319700 |
| H  | 2.50169000  | 1.75772400  | -3.40235300 |
| H  | 0.64282200  | -3.54341000 | 4.24046600  |
| H  | -0.23608200 | -1.99948300 | 4.03430600  |
| H  | -0.45799900 | -3.32238300 | 2.84697300  |
| H  | 1.95440000  | -3.09585200 | 2.15200600  |
| H  | 2.16699300  | -1.76468300 | 3.31726200  |
| Mg | 4.45416100  | -0.36469300 | -0.12220900 |
| C  | -0.70517500 | 1.66124000  | 0.71802900  |
| H  | -0.25526500 | 2.49462500  | 0.15358200  |
| C  | -0.14702000 | 1.67093100  | 2.11532900  |
| C  | 0.68049300  | 2.60927900  | 2.57811300  |
| H  | 0.98276600  | 3.45742500  | 1.95070700  |
| H  | 1.08768600  | 2.55986200  | 3.59401600  |
| H  | -0.41752400 | 0.82174100  | 2.75695100  |
| C  | -2.25842400 | 1.97461000  | 0.70947400  |
| C  | -2.72107700 | 1.82324100  | -0.73539400 |
| O  | -3.40085300 | 0.91058100  | -1.19072000 |
| O  | -2.28373400 | 2.78377700  | -1.49421500 |
| C  | -2.60044000 | 2.72670300  | -2.89431700 |
| C  | -2.94485300 | 0.96996400  | 1.62318400  |
| O  | -3.32996100 | -0.14673700 | 1.29169500  |
| O  | -3.03517400 | 1.37677400  | 2.85401200  |
| C  | -3.56737900 | 0.46179500  | 3.82530500  |
| H  | -2.16592000 | 1.81723100  | -3.33427100 |
| H  | -3.69191900 | 2.72808200  | -3.02659100 |
| H  | -4.59950100 | 0.19489200  | 3.55654200  |
| H  | -2.93923300 | -0.44007500 | 3.86671300  |
| Mg | -3.97413400 | -0.88108000 | -0.46874600 |

|    |             |             |             |
|----|-------------|-------------|-------------|
| C  | -2.51105400 | 3.41364000  | 1.18177800  |
| H  | -1.97492900 | 4.11210600  | 0.52369300  |
| H  | -3.58738900 | 3.65027700  | 1.15775600  |
| H  | -2.14095600 | 3.53872300  | 2.20830900  |
| H  | -2.15558100 | 3.62600400  | -3.33423800 |
| H  | -3.53992500 | 0.99984100  | 4.77958500  |
| Br | -6.40924000 | -0.98577600 | -0.41154300 |
| Br | -2.55755200 | -2.66537600 | -1.32369300 |
| Br | 5.95315700  | 1.04084100  | 1.24548300  |
| Br | 5.49040100  | -2.10409000 | -1.53279900 |

### TS2

|    |             |             |             |
|----|-------------|-------------|-------------|
| C  | -2.92726200 | 1.09302700  | -0.65601200 |
| C  | -1.49969400 | 0.68147700  | -0.37522100 |
| C  | -0.48318500 | 1.65231700  | -0.16339200 |
| O  | 0.73173700  | 1.41955100  | 0.02011500  |
| O  | -0.90017500 | 2.91563000  | -0.17107100 |
| C  | -0.64785600 | 5.27365800  | -0.04328300 |
| C  | 0.07572300  | 3.94936200  | 0.01262300  |
| C  | -1.17861600 | -0.70138300 | -0.37778100 |
| O  | -0.05039300 | -1.21871400 | -0.23731600 |
| O  | -2.23630600 | -1.49762100 | -0.55449900 |
| C  | -3.38287100 | -3.57210300 | -0.70026900 |
| C  | -2.02840500 | -2.91562300 | -0.57396300 |
| H  | -2.99501600 | 2.19080500  | -0.51363400 |
| H  | -3.27534300 | 0.85523700  | -1.67423800 |
| H  | 0.07486100  | 6.09352500  | 0.09404400  |
| H  | -1.14542500 | 5.40544400  | -1.01781300 |
| H  | -1.40585200 | 5.33839600  | 0.75418600  |
| H  | 0.57536300  | 3.79911000  | 0.98241300  |
| H  | 0.83575300  | 3.86728100  | -0.78008200 |
| H  | -3.25757000 | -4.66577600 | -0.74228100 |
| H  | -4.01959200 | -3.32721400 | 0.16578400  |
| H  | -3.89210500 | -3.24318200 | -1.62095500 |
| H  | -1.37331600 | -3.16609600 | -1.42327000 |
| H  | -1.51690700 | -3.21380000 | 0.35417800  |
| Mg | 1.68939500  | -0.31418600 | 0.07067300  |
| C  | -3.80784600 | 0.50923300  | 0.35460700  |
| H  | -3.51986400 | 0.65650500  | 1.40444100  |
| C  | -4.97461000 | -0.22561800 | 0.09192500  |
| C  | -5.69290100 | -0.69021800 | 1.15140400  |
| H  | -5.35194300 | -0.51051700 | 2.17800400  |
| H  | -6.62324200 | -1.25094900 | 1.00934600  |
| H  | -5.28563800 | -0.40371600 | -0.94164900 |
| Br | 2.55145400  | -0.79313400 | 2.32569000  |
| Br | 3.18652700  | -0.57630500 | -1.86449600 |

### INT3

|    |             |             |             |
|----|-------------|-------------|-------------|
| C  | -2.90107000 | 1.14917300  | -0.40946300 |
| C  | -1.46871100 | 0.71973100  | -0.23388100 |
| C  | -0.42609500 | 1.67479700  | -0.12393200 |
| O  | 0.79717000  | 1.42786000  | -0.03180800 |
| O  | -0.82991900 | 2.94313500  | -0.12413000 |
| C  | -0.54653400 | 5.29890800  | -0.02435100 |
| C  | 0.16541600  | 3.96722000  | -0.00390200 |
| C  | -1.16956400 | -0.66107600 | -0.30780900 |
| O  | -0.04738500 | -1.20792900 | -0.25708200 |
| O  | -2.25816400 | -1.43222100 | -0.44446200 |
| C  | -3.47322100 | -3.46944900 | -0.56615600 |
| C  | -2.09504600 | -2.85602900 | -0.48916000 |
| H  | -3.02704600 | 2.15623700  | 0.05271000  |
| H  | -3.23308100 | 1.24562000  | -1.45841100 |
| H  | 0.19115100  | 6.11203200  | 0.06541200  |
| H  | -1.09974500 | 5.43079200  | -0.96838300 |
| H  | -1.25535800 | 5.37534700  | 0.81618400  |
| H  | 0.72016300  | 3.81718400  | 0.93565100  |
| H  | 0.87655900  | 3.87371200  | -0.83953900 |
| H  | -3.38248100 | -4.56596400 | -0.62059500 |
| H  | -4.06794000 | -3.21288100 | 0.32622600  |
| H  | -4.00807800 | -3.11851100 | -1.46394000 |
| H  | -1.48429100 | -3.11354600 | -1.36845800 |
| H  | -1.55469100 | -3.17988200 | 0.41379100  |
| Mg | 1.71130700  | -0.32994500 | 0.03435900  |
| C  | -3.83743400 | 0.32900200  | 0.35315200  |
| H  | -3.53824300 | 0.03806300  | 1.36867700  |
| C  | -5.12088300 | -0.04547700 | -0.08478300 |
| C  | -5.90497400 | -0.75887600 | 0.76713400  |
| H  | -5.53782100 | -1.03714900 | 1.76203000  |
| H  | -6.91525800 | -1.07505600 | 0.48546500  |
| H  | -5.45800500 | 0.23372500  | -1.08720100 |
| Br | 2.54228500  | -0.80274700 | 2.30442200  |
| Br | 3.21810100  | -0.65310100 | -1.88251200 |

**M1**

|   |             |             |             |
|---|-------------|-------------|-------------|
| C | -0.67234700 | 0.08104000  | -1.68275600 |
| C | -0.86438200 | 0.47702700  | -0.23319300 |
| C | -2.26541300 | 0.66535900  | 0.25710300  |
| O | -2.64023400 | 1.59543400  | 0.92151800  |
| O | -3.07588900 | -0.30118300 | -0.17557800 |
| C | -5.19187500 | -1.35496100 | -0.44234300 |
| C | -4.46296100 | -0.18016700 | 0.16410800  |
| C | 0.17840900  | 1.28787100  | 0.47831100  |
| O | 0.18538400  | 1.47606200  | 1.66630300  |
| O | 1.14662300  | 1.69642900  | -0.33775000 |
| C | 3.30812200  | 2.56896400  | -0.81247900 |
| C | 2.31789800  | 2.24298400  | 0.27967600  |

|   |             |             |             |
|---|-------------|-------------|-------------|
| H | -1.58742000 | -0.03317300 | -2.26890600 |
| H | 0.17048500  | 0.55362500  | -2.19204900 |
| H | -6.26409600 | -1.28980400 | -0.19836500 |
| H | -5.08226600 | -1.35782300 | -1.53900800 |
| H | -4.79982700 | -2.30493300 | -0.04415800 |
| H | -4.55695200 | -0.16228500 | 1.26149000  |
| H | -4.83838200 | 0.78007600  | -0.22404800 |
| H | 4.22030500  | 2.99786300  | -0.36804900 |
| H | 3.58563300  | 1.66068900  | -1.37229000 |
| H | 2.88348000  | 3.30356700  | -1.51595400 |
| H | 2.03240000  | 3.13845500  | 0.85407000  |
| H | 2.71808800  | 1.49828100  | 0.98842600  |
| C | -0.39499100 | -0.93066800 | -0.63620700 |
| H | -1.16746500 | -1.68862200 | -0.47586400 |
| C | 0.99277300  | -1.35354100 | -0.26238200 |
| C | 2.06588400  | -1.26089400 | -1.15461000 |
| C | 1.22708100  | -1.83679500 | 1.03264700  |
| C | 3.35011100  | -1.64326800 | -0.76069100 |
| H | 1.89863400  | -0.88650800 | -2.16817400 |
| C | 2.50844100  | -2.21901200 | 1.42797400  |
| H | 0.39286900  | -1.90461400 | 1.73766700  |
| C | 3.57517000  | -2.12103200 | 0.53107000  |
| H | 4.17908400  | -1.56613000 | -1.46914800 |
| H | 2.67599100  | -2.59200900 | 2.44167700  |
| H | 4.58086900  | -2.41803200 | 0.83937600  |

**M1•MgBr<sub>2</sub>**

|   |             |             |             |
|---|-------------|-------------|-------------|
| C | -1.89404700 | 2.18646000  | -1.24041200 |
| C | -0.74933000 | 1.29699300  | -0.78599300 |
| C | 0.54579300  | 1.91934400  | -0.40181600 |
| O | 1.58184700  | 1.29737400  | -0.17943800 |
| O | 0.48363400  | 3.21301000  | -0.28485000 |
| C | 1.32272000  | 5.38789500  | 0.21517400  |
| C | 1.66494300  | 3.92092200  | 0.16765500  |
| C | -0.72201300 | -0.12793100 | -1.21900400 |
| O | 0.17409300  | -0.92010400 | -0.93697400 |
| O | -1.77173600 | -0.49142500 | -1.89032100 |
| C | -3.26036400 | -2.05086100 | -2.90877000 |
| C | -1.94745100 | -1.89893900 | -2.18402400 |
| H | -1.63460600 | 3.23498800  | -1.39743600 |
| H | -2.55683600 | 1.73359600  | -1.98163000 |
| H | 2.20585400  | 5.95064600  | 0.55599900  |
| H | 1.03719100  | 5.75543000  | -0.78339200 |
| H | 0.49542900  | 5.57463500  | 0.91831700  |
| H | 1.93807100  | 3.52210300  | 1.15612900  |
| H | 2.47879000  | 3.70403700  | -0.53961900 |
| H | -3.41614400 | -3.11473800 | -3.14725300 |
| H | -4.09721300 | -1.70652600 | -2.27998200 |

|    |             |             |             |
|----|-------------|-------------|-------------|
| H  | -3.25626600 | -1.47817500 | -3.84997400 |
| H  | -1.09261600 | -2.22801700 | -2.79320200 |
| H  | -1.93179400 | -2.44347800 | -1.22682200 |
| Mg | 1.88125200  | -0.67527000 | 0.09891900  |
| C  | -1.94822700 | 1.68011200  | 0.14121800  |
| H  | -1.63205500 | 2.37429300  | 0.92809200  |
| C  | -2.88419600 | 0.60086500  | 0.58857800  |
| C  | -4.16910900 | 0.48888200  | 0.05021100  |
| C  | -2.45951200 | -0.31883300 | 1.55681300  |
| C  | -5.02322100 | -0.53012600 | 0.47652800  |
| H  | -4.50353800 | 1.20152700  | -0.70878800 |
| C  | -3.31014400 | -1.34152600 | 1.97549700  |
| H  | -1.44910800 | -0.24143400 | 1.97451800  |
| C  | -4.59439000 | -1.44883100 | 1.43580300  |
| H  | -6.02707100 | -0.60930700 | 0.05150000  |
| H  | -2.96649200 | -2.05900700 | 2.72503300  |
| H  | -5.26126800 | -2.25026700 | 1.76369900  |
| Br | 1.38360400  | -1.13475600 | 2.45054800  |
| Br | 3.81420300  | -1.49937200 | -1.11981400 |

**TS3**

|    |             |             |             |
|----|-------------|-------------|-------------|
| C  | -0.23167700 | 0.58895600  | -0.88049500 |
| C  | 1.27032700  | 0.41379100  | -0.96517600 |
| C  | 2.12230500  | 1.55956900  | -0.83036900 |
| O  | 3.36831900  | 1.55676900  | -0.81700300 |
| O  | 1.46780100  | 2.70597400  | -0.71660200 |
| C  | 1.25679300  | 5.05350900  | -0.42626000 |
| C  | 2.23137800  | 3.90361600  | -0.50375700 |
| C  | 1.84702900  | -0.88716300 | -1.16106500 |
| O  | 3.05567900  | -1.17503500 | -1.06732200 |
| O  | 0.97012100  | -1.82468600 | -1.46539500 |
| C  | 0.25493700  | -4.02831300 | -1.99805500 |
| C  | 1.41889400  | -3.18629600 | -1.53378400 |
| H  | -0.54498900 | 1.57425600  | -1.24041700 |
| H  | -0.79408100 | -0.22103200 | -1.36259900 |
| H  | 1.80895300  | 5.98981800  | -0.24714300 |
| H  | 0.69798100  | 5.15199500  | -1.37084600 |
| H  | 0.54051100  | 4.90349800  | 0.39790900  |
| H  | 2.80863000  | 3.78990200  | 0.42740600  |
| H  | 2.94038400  | 4.02373000  | -1.33688700 |
| H  | 0.57246900  | -5.08114900 | -2.06749400 |
| H  | -0.59110100 | -3.95874800 | -1.29574000 |
| H  | -0.08994900 | -3.69700400 | -2.99059200 |
| H  | 2.26733200  | -3.24478800 | -2.23200700 |
| H  | 1.77356600  | -3.48589400 | -0.53318800 |
| Mg | 4.50566500  | -0.01057900 | -0.35595500 |
| C  | -0.09883600 | 0.49163700  | 0.58658700  |
| H  | 0.35174900  | 1.35411600  | 1.08404500  |

|    |             |             |             |
|----|-------------|-------------|-------------|
| C  | -2.06921600 | 1.45247500  | 1.57829200  |
| C  | -2.44950100 | 2.10956600  | 0.36268300  |
| O  | -3.16634200 | 1.64242400  | -0.54679900 |
| O  | -1.92750200 | 3.31921400  | 0.20702400  |
| C  | -2.22417800 | 4.01972900  | -0.99770700 |
| C  | -2.76480600 | 0.24892900  | 1.93799600  |
| O  | -3.52104400 | -0.43018200 | 1.21385000  |
| O  | -2.52173000 | -0.15795900 | 3.17339700  |
| C  | -3.14821300 | -1.35823100 | 3.61507500  |
| H  | -1.76436900 | 3.51641900  | -1.86312900 |
| H  | -3.31196600 | 4.08677600  | -1.14727100 |
| H  | -4.23760500 | -1.21378000 | 3.68984500  |
| H  | -2.93290400 | -2.18704200 | 2.92516400  |
| Mg | -4.15648700 | -0.07188200 | -0.62952100 |
| C  | -1.36225800 | 2.22339900  | 2.66483300  |
| H  | -0.72139400 | 3.00534900  | 2.23184800  |
| H  | -2.07432600 | 2.71222900  | 3.35487700  |
| H  | -0.73163000 | 1.54990400  | 3.26732700  |
| H  | -1.79809800 | 5.02284500  | -0.87340100 |
| H  | -2.72705200 | -1.56702500 | 4.60715900  |
| C  | -0.07251500 | -0.76789500 | 1.32931000  |
| C  | -0.74789800 | -1.91349900 | 0.86947800  |
| C  | 0.63327200  | -0.82353300 | 2.54392900  |
| C  | -0.70356400 | -3.09092400 | 1.61152100  |
| H  | -1.31339700 | -1.87983500 | -0.06679800 |
| C  | 0.67423900  | -2.00380400 | 3.28127600  |
| H  | 1.17632500  | 0.06014900  | 2.88895300  |
| C  | 0.00672500  | -3.13892800 | 2.81514500  |
| H  | -1.23273400 | -3.97751400 | 1.25247700  |
| H  | 1.23816000  | -2.04194200 | 4.21622700  |
| H  | 0.03967500  | -4.06680600 | 3.39212100  |
| Br | 4.47579100  | -0.16284000 | 2.10346100  |
| Br | 6.58484900  | -0.16076800 | -1.63315000 |
| Br | -3.11712300 | -1.64297300 | -2.22617900 |
| Br | -6.58357700 | 0.26884900  | -0.71636300 |

## 10. Reference

- 1 X. He, G. Qiu, J. Yang, Y. Xiao, Z. Wu, G. Qiu and X. Hu, *Eur. J. Med. Chem.*, 2010, **45**, 3818–3830.
- 2 P. D. Pohlhaus, S. D. Sanders, A. T. Parsons, W. Li and J. S. Johnson, *J. Am. Chem. Soc.*, 2008, **130**, 15928–15939.
- 3 Y.-Y. Li, T. Xie, L. Zhu, S.-Q. Zheng, D.-F. Chen and L.-Z. Gong, *Nat. Synth.* 2023, **2**, 1232–1242.
- 4 S. Tang, X. Liang, Y. Li, Y.-Y. Li, G. Luo, J. Hu and D.-F. Chen, *J. Am. Chem. Soc.*, 2025, **147**, 7196–7202.
- 5 Frisch, M. J.; Trucks, G. W.; Schlegel, H. B.; Scuseria, G. E.; Robb, M. A.; Cheeseman, J. R.; Scalmani, G.; Barone, V.; Petersson, G. A.; Nakatsuji, H.; Li, X.; Caricato, M.; Marenich, A. V.; Bloino, J.; Janesko, B. G.; Gomperts, R.; Mennucci, B.; Hratchian, H. P.; Ortiz, J. V.; Izmaylov, A. F.; Sonnenberg, J. L.; Williams-Young, D.; Ding, F.; Lipparini, F.; Egidi, F.; Goings, J.; Peng, B.; Petrone, A.; Henderson, T.; Ranasinghe, D.; Zakrzewski, V. G.; Gao, J.; Rega, N.; Zheng, G.; Liang, W.; Hada, M.; Ehara, M.; Toyota, K.; Fukuda, R.; Hasegawa, J.; Ishida, M.; Nakajima, T.; Honda, Y.; Kitao, O.; Nakai, H.; Vreven, T.; Throssell, K.; Montgomery, J. A., Jr.; Peralta, J. E.; Ogliaro, F.; Bearpark, M. J.; Heyd, J. J.; Brothers, E. N.; Kudin, K. N.; Staroverov, V. N.; Keith, T. A.; Kobayashi, R.; Normand, J.; Raghavachari, K.; Rendell, A. P.; Burant, J. C.; Iyengar, S. S.; Tomasi, J.; Cossi, M.; Millam, J. M.; Klene, M.; Adamo, C.; Cammi, R.; Ochterski, J. W.; Martin, R. L.; Morokuma, K.; Farkas, O.; Foresman, J. B.; Fox, D. J. *Gaussian 16*, Revision C.01; Gaussian, Inc.: Wallingford, CT, 2016.
- 6 Y. Zhao and D. G. Truhlar, *Theor. Chem. Acc.* 2008, **120**, 215–241.
- 7 S. Grimme, J. Antony, S. Ehrlich and H. Krieg, *J. Chem. Phys.* 2010, **132**, 154104.
- 8 F. Weigend and R. Ahlrichs, *R. Phys. Chem. Chem. Phys.* 2005, **7**, 3297–3305.
- 9 L. Goerigk and S. Grimme, *S. J. Chem. Theory Comput.* 2011, **7**, 291–309.
- 10 F. Neese, F. Software update: the ORCA program system, version 6.0. *WIREs Comput. Mol. Sci.* 2025, **15**, e70019.
- 11 A. V. Marenich, C. J. Cramer, and D. G. Truhlar, *J. Phys. Chem. B* 2009, **113**, 6378–6396.
